# Supplementary material for: Comorbidity between depression and anxiety: assessing the role of bridge mental states in dynamic psychological networks
Source: PubMed Central journal article supplement (PMC7523307; doi:10.1186/s12916-020-01738-z), 2020-09-29
Supplement: 12916_2020_1738_MOESM2_ESM.pdf [file 12916_2020_1738_MOESM2_ESM.pdf]

ADDITIONAL FILE 2 – Mplus syntax main analysis

**Comorbidity between depression and anxiety: assessing the role of bridge mental states in dynamic psychological networks.**

Robin. N. Groen , Oisín Ryan, Johanna T.W. Wigman, Harriette Riese, Brenda W.J.H. Penninx, Erik J. Giltay, Marieke Wichers, Catharina A. Hartman

## MPLUS SYNTAX – Main analysis

TITLE: NESDA EMA comorbidity depression and anxiety bridge

hypothesis - 7 variables main analysis.

Variables standardized prior to Mplus ;

DATA: FILE = "ema\_std\_7v\_main.dat"; ! Important which file is used!

VARIABLE: NAMES = pident outcome\_group time\_h time\_m D\_AC D\_DC anx1  
dep1 bridge1 dep2 dep3 anx2 bridge2;

MISSING=.

CLUSTER = pident;

usevar = anx1 dep1 bridge1 dep2 dep3 anx2 bridge2 D\_DC D\_AC;

between = D\_AC D\_DC;

missing = all(-999);

lagged = anx1 dep1 bridge1 dep2 dep3 anx2 bridge2 (1);

tinterval = time\_m(180);

ANALYSIS: TYPE IS TWOLEVEL RANDOM; ! This allows for random slopes

ESTIMATOR = BAYES; ! DSEM requires Bayesian estimation

PROC = 3; ! Using 2 processors makes it faster

FBITER = (40000); !

THIN = 4;

BSEED = 1234; ! brackets allows extra iterations for convergence

MODEL: %WITHIN%! Specify the (random) lagged relationships

A1A1 | anx1 ON anx1&1;

A1D1 | anx1 ON dep1&1; !anx1 is predicted by dep1

A1B1 | anx1 ON bridge1&1; !anx1 is predicted by bridge1

A1D2 | anx1 ON dep2&1;

A1D3 | anx1 ON dep3&1;

A1A2 | anx1 ON anx2&1;

A1B2 | anx1 ON bridge2&1;

D1A1 | dep1 ON anx1&1; !dep1 is predicted by anx1

D1D1 | dep1 ON dep1&1;

D1B1 | dep1 ON bridge1&1;

D1D2 | dep1 ON dep2&1;

D1D3 | dep1 ON dep3&1;

D1A2 | dep1 ON anx2&1;

D1B2 | dep1 ON bridge2&1;

B1A1 | bridge1 ON anx1&1; ! bridge 1 is predicted by anx1

B1D1 | bridge1 ON dep1&1;

B1B1 | bridge1 ON bridge1&1;

B1D2 | bridge1 ON dep2&1;

B1D3 | bridge1 ON dep3&1;

B1A2 | bridge1 ON anx2&1;

B1B2 | bridge1 ON bridge2&1;

D2A1 | dep2 ON anx1&1;

D2D1 | dep2 ON dep1&1;

D2B1 | dep2 ON bridge1&1;

D2D2 | dep2 ON dep2&1;

D2D3 | dep2 ON dep3&1;

D2A2 | dep2 ON anx2&1;

D2B2 | dep2 ON bridge2&1;

D3A1 | dep3 ON anx1&1;

D3D1 | dep3 ON dep1&1;

D3B1 | dep3 ON bridge1&1;

D3D2 | dep3 ON dep2&1;

D3D3 | dep3 ON dep3&1;

D3A2 | dep3 ON anx2&1;

D3B2 | dep3 ON bridge2&1;

A2A1 | anx2 ON anx1&1; !anx2 is predicted by anx1

A2D1 | anx2 ON dep1&1;

A2B1 | anx2 ON bridge1&1;

A2D2 | anx2 ON dep2&1;

A2D3 | anx2 ON dep3&1;

A2A2 | anx2 ON anx2&1;

A2B2 | anx2 ON bridge2&1;

B2A1 | bridge2 ON anx1&1;

B2D1 | bridge2 ON dep1&1; !anx1 is predicted by dep1

B2B1 | bridge2 ON bridge1&1; !anx1 is predicted by bridge1

B2D2 | bridge2 ON dep2&1;

B2D3 | bridge2 ON dep3&1;

B2A2 | bridge2 ON anx2&1;

B2B2 | bridge2 ON bridge2&1;

%BETWEEN%

anx1 dep1 bridge1 dep2 dep3 anx2 bridge2 A1A1-B2B2; ! specify all variances

anx1 WITH dep1 bridge1 dep2 dep3 anx2 bridge2; ! covariances random intercept

dep1 WITH bridge1 dep2 dep3 anx2 bridge2; ! covariances random intercept

bridge1 WITH dep2 dep3 anx2 bridge2; ! covariances random intercept

dep2 WITH dep3 anx2 bridge2; ! covariances random intercept

dep3 WITH anx2 bridge2; ! covariances random intercept

anx2 WITH bridge2; ! covariances random intercept

[A1A1 ] (A1A1\_0);  
A1A1 ON D\_DC (A1A1\_r1);  
A1A1 ON D\_AC (A1A1\_r2);  
[A1D1 ] (A1D1\_0);  
A1D1 ON D\_DC (A1D1\_r1);  
A1D1 ON D\_AC (A1D1\_r2);  
[A1B1 ] (A1B1\_0);  
A1B1 ON D\_DC (A1B1\_r1);  
A1B1 ON D\_AC (A1B1\_r2);  
[A1D2 ] (A1D2\_0);  
A1D2 ON D\_DC (A1D2\_r1);  
A1D2 ON D\_AC (A1D2\_r2);  
[A1D3 ] (A1D3\_0);  
A1D3 ON D\_DC (A1D3\_r1);  
A1D3 ON D\_AC (A1D3\_r2);  
[A1A2 ] (A1A2\_0);  
A1A2 ON D\_DC (A1A2\_r1);  
A1A2 ON D\_AC (A1A2\_r2);  
[A1B2 ] (A1B2\_0);  
A1B2 ON D\_DC (A1B2\_r1);  
A1B2 ON D\_AC (A1B2\_r2);

[D1A1 ] (D1A1\_0);  
D1A1 ON D\_DC (D1A1\_r1);  
D1A1 ON D\_AC (D1A1\_r2);  
[D1D1 ] (D1D1\_0);  
D1D1 ON D\_DC (D1D1\_r1);  
D1D1 ON D\_AC (D1D1\_r2);  
[D1B1 ] (D1B1\_0);  
D1B1 ON D\_DC (D1B1\_r1);  
D1B1 ON D\_AC (D1B1\_r2);  
[D1D2 ] (D1D2\_0);  
D1D2 ON D\_DC (D1D2\_r1);  
D1D2 ON D\_AC (D1D2\_r2);  
[D1D3 ] (D1D3\_0);  
D1D3 ON D\_DC (D1D3\_r1);  
D1D3 ON D\_AC (D1D3\_r2);  
[D1A2 ] (D1A2\_0);  
D1A2 ON D\_DC (D1A2\_r1);  
D1A2 ON D\_AC (D1A2\_r2);  
[D1B2 ] (D1B2\_0);  
D1B2 ON D\_DC (D1B2\_r1);  
D1B2 ON D\_AC (D1B2\_r2);

[B1A1 ] (B1A1\_0);  
B1A1 ON D\_DC (B1A1\_r1);  
B1A1 ON D\_AC (B1A1\_r2);  
[B1D1 ] (B1D1\_0);  
B1D1 ON D\_DC (B1D1\_r1);  
B1D1 ON D\_AC (B1D1\_r2);  
[B1B1 ] (B1B1\_0);  
B1B1 ON D\_DC (B1B1\_r1);  
B1B1 ON D\_AC (B1B1\_r2);  
[B1D2 ] (B1D2\_0);  
B1D2 ON D\_DC (B1D2\_r1);  
B1D2 ON D\_AC (B1D2\_r2);  
[B1D3 ] (B1D3\_0);  
B1D3 ON D\_DC (B1D3\_r1);  
B1D3 ON D\_AC (B1D3\_r2);  
[B1A2 ] (B1A2\_0);  
B1A2 ON D\_DC (B1A2\_r1);  
B1A2 ON D\_AC (B1A2\_r2);  
[B1B2 ] (B1B2\_0);  
B1B2 ON D\_DC (B1B2\_r1);  
B1B2 ON D\_AC (B1B2\_r2);

[D2A1 ] (D2A1\_0);  
D2A1 ON D\_DC (D2A1\_r1);  
D2A1 ON D\_AC (D2A1\_r2);  
[D2D1 ] (D2D1\_0);  
D2D1 ON D\_DC (D2D1\_r1);  
D2D1 ON D\_AC (D2D1\_r2);  
[D2B1 ] (D2B1\_0);  
D2B1 ON D\_DC (D2B1\_r1);  
D2B1 ON D\_AC (D2B1\_r2);  
[D2D2 ] (D2D2\_0);  
D2D2 ON D\_DC (D2D2\_r1);  
D2D2 ON D\_AC (D2D2\_r2);  
[D2D3 ] (D2D3\_0);  
D2D3 ON D\_DC (D2D3\_r1);  
D2D3 ON D\_AC (D2D3\_r2);  
[D2A2 ] (D2A2\_0);  
D2A2 ON D\_DC (D2A2\_r1);  
D2A2 ON D\_AC (D2A2\_r2);  
[D2B2 ] (D2B2\_0);  
D2B2 ON D\_DC (D2B2\_r1);  
D2B2 ON D\_AC (D2B2\_r2);

[D3A1 ] (D3A1\_0);  
D3A1 ON D\_DC (D3A1\_r1);  
D3A1 ON D\_AC (D3A1\_r2);

[D3D1 ] (D3D1\_0);  
D3D1 ON D\_DC (D3D1\_r1);  
D3D1 ON D\_AC (D3D1\_r2);  
[D3B1] (D3B1\_0);  
D3B1 ON D\_DC (D3B1\_r1);  
D3B1 ON D\_AC (D3B1\_r2);  
[D3D2] (D3D2\_0);  
D3D2 ON D\_DC (D3D2\_r1);  
D3D2 ON D\_AC (D3D2\_r2);  
[D3D3 ] (D3D3\_0);  
D3D3 ON D\_DC (D3D3\_r1);  
D3D3 ON D\_AC (D3D3\_r2);  
[D3A2 ] (D3A2\_0);  
D3A2 ON D\_DC (D3A2\_r1);  
D3A2 ON D\_AC (D3A2\_r2);  
[D3B2 ] (D3B2\_0);  
D3B2 ON D\_DC (D3B2\_r1);  
D3B2 ON D\_AC (D3B2\_r2);

[A2A1 ] (A2A1\_0);  
A2A1 ON D\_DC (A2A1\_r1);  
A2A1 ON D\_AC (A2A1\_r2);  
[A2D1 ] (A2D1\_0);  
A2D1 ON D\_DC (A2D1\_r1);  
A2D1 ON D\_AC (A2D1\_r2);  
[A2B1] (A2B1\_0);  
A2B1 ON D\_DC (A2B1\_r1);  
A2B1 ON D\_AC (A2B1\_r2);  
[A2D2] (A2D2\_0);  
A2D2 ON D\_DC (A2D2\_r1);  
A2D2 ON D\_AC (A2D2\_r2);  
[A2D3] (A2D3\_0);  
A2D3 ON D\_DC (A2D3\_r1);  
A2D3 ON D\_AC (A2D3\_r2);  
[A2A2 ] (A2A2\_0);  
A2A2 ON D\_DC (A2A2\_r1);  
A2A2 ON D\_AC (A2A2\_r2);  
[A2B2 ] (A2B2\_0);  
A2B2 ON D\_DC (A2B2\_r1);  
A2B2 ON D\_AC (A2B2\_r2);

[B2A1 ] (B2A1\_0);  
B2A1 ON D\_DC (B2A1\_r1);  
B2A1 ON D\_AC (B2A1\_r2);  
[B2D1 ] (B2D1\_0);  
B2D1 ON D\_DC (B2D1\_r1);  
B2D1 ON D\_AC (B2D1\_r2);  
[B2B1] (B2B1\_0);

B2B1 ON D\_DC (B2B1\_r1);  
 B2B1 ON D\_AC (B2B1\_r2);  
 [B2D2] (B2D2\_0);  
 B2D2 ON D\_DC (B2D2\_r1);  
 B2D2 ON D\_AC (B2D2\_r2);  
 [B2D3] (B2D3\_0);  
 B2D3 ON D\_DC (B2D3\_r1);  
 B2D3 ON D\_AC (B2D3\_r2);  
 [B2A2 ] (B2A2\_0);  
 B2A2 ON D\_DC (B2A2\_r1);  
 B2A2 ON D\_AC (B2A2\_r2);  
 [B2B2 ] (B2B2\_0);  
 B2B2 ON D\_DC (B2B2\_r1);  
 B2B2 ON D\_AC (B2B2\_r2);

Model Constraint:

! calculate separate indirect effects Worrying for all three groups

! comorbid group

NEW(iB2\_AD\_0 iB2\_DA\_0 s\_iB2\_0);

$iB2\_AD\_0 = ((B2A1\_0 * D1B2\_0) + (B2A2\_0 * D1B2\_0) +$   
 $(B2A1\_0 * D2B2\_0) + (B2A2\_0 * D2B2\_0) +$   
 $(B2A1\_0 * D3B2\_0) + (B2A2\_0 * D3B2\_0)) * 1000;$  ! indirect effect Anxiety to Bridge 2 to Dep

$iB2\_DA\_0 = ((B2D1\_0 * A1B2\_0) + (B2D2\_0 * A1B2\_0) + (B2D3\_0 * A1B2\_0) +$   
 $(B2D1\_0 * A2B2\_0) + (B2D2\_0 * A2B2\_0) + (B2D3\_0 * A2B2\_0)) * 1000;$  ! indirect effect Dep to Bridge 2 to Anxiety

! indirect effect DEP to Bridge to ANX

$s\_iB2\_0 = iB2\_AD\_0 + iB2\_DA\_0;$

! depression group

NEW(iB2\_AD\_1 iB2\_DA\_1 s\_iB2\_1);

$iB2\_AD\_1 = (((B2A1\_0 + B2A1\_r1) * (D1B2\_0 + D1B2\_r1)) +$   
 $((B2A2\_0 + B2A2\_r1) * (D1B2\_0 + D1B2\_r1)) + ((B2A1\_0 + B2A1\_r1) * (D2B2\_0 + D2B2\_r1))$   
 $+ ((B2A2\_0 + B2A2\_r1) * (D2B2\_0 + D2B2\_r1))$   
 $+ ((B2A1\_0 + B2A1\_r1) * (D3B2\_0 + D3B2\_r1)) +$   
 $((B2A2\_0 + B2A2\_r1) * (D3B2\_0 + D3B2\_r1))) * 1000;$

$iB2\_DA\_1 = (((B2D1\_0 + B2D1\_r1) * (A1B2\_0 + A1B2\_r1)) +$   
 $((B2D2\_0 + B2D2\_r1) * (A1B2\_0 + A1B2\_r1)) + ((B2D3\_0 + B2D3\_r1) * (A1B2\_0 + A1B2\_r1)) +$   
 $((B2D1\_0 + B2D1\_r1) * (A2B2\_0 + A2B2\_r1)) + ((B2D2\_0 + B2D2\_r1) * (A2B2\_0 + A2B2\_r1)) +$   
 $((B2D3\_0 + B2D3\_r1) * (A2B2\_0 + A2B2\_r1))) * 1000;$

$s\_iB2\_1 = iB2\_AD\_1 + iB2\_DA\_1;$

! anxiety group

NEW(iB2\_AD\_2 iB2\_DA\_2 s\_iB2\_2);

$iB2\_AD\_2 = (((B2A1\_0 + B2A1\_r2) * (D1B2\_0 + D1B2\_r2)) +$   
 $((B2A2\_0 + B2A2\_r2) * (D1B2\_0 + D1B2\_r2))$   
 $+ ((B2A1\_0 + B2A1\_r2) * (D2B2\_0 + D2B2\_r2)) + ((B2A2\_0 + B2A2\_r2) * (D2B2\_0 + D2B2\_r2)) +$   
 $((B2A1\_0 + B2A1\_r2) * (D3B2\_0 + D3B2\_r2)) +$

$((B2A2\_0 + B2A2\_r2) * (D3B2\_0 + D3B2\_r2)) * 1000;$   
 $iB2\_DA\_2 = (((B2D1\_0 + B2D1\_r2) * (A1B2\_0 + A1B2\_r2)) +$   
 $((B2D2\_0 + B2D2\_r2) * (A1B2\_0 + A1B2\_r2)) + ((B2D3\_0 + B2D3\_r2) * (A1B2\_0 + A1B2\_r2)) +$   
 $((B2D1\_0 + B2D1\_r2) * (A2B2\_0 + A2B2\_r2)) + ((B2D2\_0 + B2D2\_r2) * (A2B2\_0 + A2B2\_r2)) +$   
 $((B2D3\_0 + B2D3\_r2) * (A2B2\_0 + A2B2\_r2))) * 1000;$   
 $s\_iB2\_2 = iB2\_AD\_2 + iB2\_DA\_2;$

! Group differences separate total indirect effects Worry

NEW(B2\_AD\_01 B2\_AD\_02 B2\_AD\_12 B2\_DA\_01 B2\_DA\_02 B2\_DA\_12 B2\_s\_01 B2\_s\_02 B2\_s\_12);

$B2\_AD\_01 = iB2\_AD\_0 - iB2\_AD\_1;$   
 $B2\_AD\_02 = iB2\_AD\_0 - iB2\_AD\_2;$   
 $B2\_AD\_12 = iB2\_AD\_1 - iB2\_AD\_2;$   
 $B2\_DA\_01 = iB2\_DA\_0 - iB2\_DA\_1;$   
 $B2\_DA\_02 = iB2\_DA\_0 - iB2\_DA\_2;$   
 $B2\_DA\_12 = iB2\_DA\_1 - iB2\_DA\_2;$   
 $B2\_s\_01 = s\_iB2\_0 - s\_iB2\_1;$   
 $B2\_s\_02 = s\_iB2\_0 - s\_iB2\_2;$   
 $B2\_s\_12 = s\_iB2\_1 - s\_iB2\_2;$

! calculate separate indirect effects Irritated for all three groups

! comorbid group

NEW(iB1\_AD\_0 iB1\_DA\_0 s\_iB1\_0);

$iB1\_AD\_0 = ((B1A1\_0 * D1B1\_0) + (B1A2\_0 * D1B1\_0) +$   
 $(B1A1\_0 * D2B1\_0) + (B1A2\_0 * D2B1\_0) +$

$(B1A1\_0 * D3B1\_0) + (B1A2\_0 * D3B1\_0)) * 1000;$  ! indirect effect Anxiety to Bridge 1 to Dep

$iB1\_DA\_0 = ((B1D1\_0 * A1B1\_0) + (B1D2\_0 * A1B1\_0) + (B1D3\_0 * A1B1\_0) +$

$(B1D1\_0 * A2B1\_0) + (B1D2\_0 * A2B1\_0) + (B1D3\_0 * A2B1\_0)) * 1000;$  ! indirect effect Dep to Bridge 1 to Anxiety

! indirect effect DEP to Bridge to ANX

$s\_iB1\_0 = iB1\_AD\_0 + iB1\_DA\_0;$

! depression group

NEW(iB1\_AD\_1 iB1\_DA\_1 s\_iB1\_1);

$iB1\_AD\_1 = (((B1A1\_0 + B1A1\_r1) * (D1B1\_0 + D1B1\_r1)) +$

$((B1A2\_0 + B1A2\_r1) * (D1B1\_0 + D1B1\_r1))$

$+ ((B1A1\_0 + B1A1\_r1) * (D2B1\_0 + D2B1\_r1)) + ((B1A2\_0 + B1A2\_r1) * (D2B1\_0 + D2B1\_r1)) +$

$((B1A1\_0 + B1A1\_r1) * (D3B1\_0 + D3B1\_r1)) +$

$((B1A2\_0 + B1A2\_r1) * (D3B1\_0 + D3B1\_r1)) * 1000;$

$iB1\_DA\_1 = (((B1D1\_0 + B1D1\_r1) * (A1B1\_0 + A1B1\_r1)) +$

$((B1D2\_0 + B1D2\_r1) * (A1B1\_0 + A1B1\_r1)) + ((B1D3\_0 + B1D3\_r1) * (A1B1\_0 + A1B1\_r1)) +$

$((B1D1\_0 + B1D1\_r1) * (A2B1\_0 + A2B1\_r1)) + ((B1D2\_0 + B1D2\_r1) * (A2B1\_0 + A2B1\_r1)) +$

$((B1D3\_0 + B1D3\_r1) * (A2B1\_0 + A2B1\_r1)) * 1000;$

$s\_iB1\_1 = iB1\_AD\_1 + iB1\_DA\_1;$

! anxiety group



```

NEW(iB1_AD_2 iB1_DA_2 s_iB1_2);
iB1_AD_2 = (((B1A1_0+B1A1_r2) *(D1B1_0+D1B1_r2))+
((B1A2_0+ B1A2_r2)*(D1B1_0 + D1B1_r2))
+ ((B1A1_0+ B1A1_r2)*(D2B1_0+ D2B1_r2))+ ((B1A2_0+B1A2_r2) *(D2B1_0+D2B1_r2))+
((B1A1_0+ B1A1_r2)*(D3B1_0+ D3B1_r2))+
((B1A2_0+ B1A2_r2)*(D3B1_0+ D3B1_r2)))*1000;
iB1_DA_2 = (((B1D1_0+B1D1_r2)*(A1B1_0+A1B1_r2)) +
((B1D2_0+ B1D2_r2)*(A1B1_0 + A1B1_r2))+ ((B1D3_0+ B1D3_r2)*(A1B1_0+ A1B1_r2)) +
((B1D1_0+ B1D1_r2)*(A2B1_0+ A2B1_r2))+ ((B1D2_0+B1D2_r2) *(A2B1_0+A2B1_r2))+
((B1D3_0+ B1D3_r2)*(A2B1_0+ A2B1_r2)))*1000;
s_iB1_2 = iB1_AD_2 + iB1_DA_2;

```

! Group differences separate total indirect effects Irritated

```

NEW(B1_AD_01 B1_AD_02 B1_AD_12
B1_DA_01 B1_DA_02 B1_DA_12
B1_s_01 B1_s_02 B1_s_12);

```

```

B1_AD_01 = iB1_AD_0 - iB1_AD_1;
B1_AD_02 = iB1_AD_0 - iB1_AD_2;
B1_AD_12 = iB1_AD_1 - iB1_AD_2;
B1_DA_01 = iB1_DA_0 - iB1_DA_1;
B1_DA_02 = iB1_DA_0 - iB1_DA_2;
B1_DA_12 = iB1_DA_1 - iB1_DA_2;
B1_s_01 = s_iB1_0 - s_iB1_1;
B1_s_02 = s_iB1_0 - s_iB1_2;
B1_s_12 = s_iB1_1 - s_iB1_2;

```

!Fixed Effects group 1 ;

```

NEW(A1A1_1 A1A2_1
A1D1_1 A1D2_1 A1D3_1 A1B1_1
A1B2_1 A2A1_1 A2A2_1
A2D1_1 A2D2_1 A2D3_1 A2B1_1
A2B2_1 D1A1_1 D1A2_1
D1D1_1 D1D2_1 D1D3_1 D1B1_1
D1B2_1 D2A1_1 D2A2_1
D2D1_1 D2D2_1 D2D3_1 D2B1_1
D2B2_1 D3A1_1 D3A2_1
D3D1_1 D3D2_1 D3D3_1 D3B1_1
D3B2_1 B1A1_1 B1A2_1
B1D1_1 B1D2_1 B1D3_1 B1B1_1
B1B2_1 B2A1_1 B2A2_1
B2D1_1 B2D2_1 B2D3_1 B2B1_1
B2B2_1);

```

```

A1A1_1 = A1A1_0 + A1A1_r1;
A1A2_1 = A1A2_0 + A1A2_r1;
A1D1_1 = A1D1_0 + A1D1_r1;
A1D2_1 = A1D2_0 + A1D2_r1;

```

$A1D3\_1 = A1D3\_0 + A1D3\_r1;$   
 $A1B1\_1 = A1B1\_0 + A1B1\_r1;$   
 $A1B2\_1 = A1B2\_0 + A1B2\_r1;$

$A2A1\_1 = A2A1\_0 + A2A1\_r1;$   
 $A2A2\_1 = A2A2\_0 + A2A2\_r1;$   
 $A2D1\_1 = A2D1\_0 + A2D1\_r1;$   
 $A2D2\_1 = A2D2\_0 + A2D2\_r1;$   
 $A2D3\_1 = A2D3\_0 + A2D3\_r1;$   
 $A2B1\_1 = A2B1\_0 + A2B1\_r1;$   
 $A2B2\_1 = A2B2\_0 + A2B2\_r1;$

$D1A1\_1 = D1A1\_0 + D1A1\_r1;$   
 $D1A2\_1 = D1A2\_0 + D1A2\_r1;$   
 $D1D1\_1 = D1D1\_0 + D1D1\_r1;$   
 $D1D2\_1 = D1D2\_0 + D1D2\_r1;$   
 $D1D3\_1 = D1D3\_0 + D1D3\_r1;$   
 $D1B1\_1 = D1B1\_0 + D1B1\_r1;$   
 $D1B2\_1 = D1B2\_0 + D1B2\_r1;$

$D2A1\_1 = D2A1\_0 + D2A1\_r1;$   
 $D2A2\_1 = D2A2\_0 + D2A2\_r1;$   
 $D2D1\_1 = D2D1\_0 + D2D1\_r1;$   
 $D2D2\_1 = D2D2\_0 + D2D2\_r1;$   
 $D2D3\_1 = D2D3\_0 + D2D3\_r1;$   
 $D2B1\_1 = D2B1\_0 + D2B1\_r1;$   
 $D2B2\_1 = D2B2\_0 + D2B2\_r1;$

$D3A1\_1 = D3A1\_0 + D3A1\_r1;$   
 $D3A2\_1 = D3A2\_0 + D3A2\_r1;$   
 $D3D1\_1 = D3D1\_0 + D3D1\_r1;$   
 $D3D2\_1 = D3D2\_0 + D3D2\_r1;$   
 $D3D3\_1 = D3D3\_0 + D3D3\_r1;$   
 $D3B1\_1 = D3B1\_0 + D3B1\_r1;$   
 $D3B2\_1 = D3B2\_0 + D3B2\_r1;$

$B1A1\_1 = B1A1\_0 + B1A1\_r1;$   
 $B1A2\_1 = B1A2\_0 + B1A2\_r1;$   
 $B1D1\_1 = B1D1\_0 + B1D1\_r1;$   
 $B1D2\_1 = B1D2\_0 + B1D2\_r1;$   
 $B1D3\_1 = B1D3\_0 + B1D3\_r1;$   
 $B1B1\_1 = B1B1\_0 + B1B1\_r1;$   
 $B1B2\_1 = B1B2\_0 + B1B2\_r1;$

$B2A1\_1 = B2A1\_0 + B2A1\_r1;$   
 $B2A2\_1 = B2A2\_0 + B2A2\_r1;$   
 $B2D1\_1 = B2D1\_0 + B2D1\_r1;$   
 $B2D2\_1 = B2D2\_0 + B2D2\_r1;$   
 $B2D3\_1 = B2D3\_0 + B2D3\_r1;$

B2B1\_1 = B2B1\_0 + B2B1\_r1;  
B2B2\_1 = B2B2\_0 + B2B2\_r1;

! Fixed effects Dummy 2 (Anxiety);

NEW(A1A1\_2 A1A2\_2  
A1D1\_2 A1D2\_2 A1D3\_2 A1B1\_2  
A1B2\_2 A2A1\_2 A2A2\_2  
A2D1\_2 A2D2\_2 A2D3\_2 A2B1\_2  
A2B2\_2 D1A1\_2 D1A2\_2  
D1D1\_2 D1D2\_2 D1D3\_2 D1B1\_2  
D1B2\_2 D2A1\_2 D2A2\_2  
D2D1\_2 D2D2\_2 D2D3\_2 D2B1\_2  
D2B2\_2 D3A1\_2 D3A2\_2  
D3D1\_2 D3D2\_2 D3D3\_2 D3B1\_2  
D3B2\_2 B1A1\_2 B1A2\_2  
B1D1\_2 B1D2\_2 B1D3\_2 B1B1\_2  
B1B2\_2 B2A1\_2 B2A2\_2  
B2D1\_2 B2D2\_2 B2D3\_2 B2B1\_2  
B2B2\_2);

A1A1\_2 = A1A1\_0 + A1A1\_r2;  
A1A2\_2 = A1A2\_0 + A1A2\_r2;  
A1D1\_2 = A1D1\_0 + A1D1\_r2;  
A1D2\_2 = A1D2\_0 + A1D2\_r2;  
A1D3\_2 = A1D3\_0 + A1D3\_r2;  
A1B1\_2 = A1B1\_0 + A1B1\_r2;  
A1B2\_2 = A1B2\_0 + A1B2\_r2;

A2A1\_2 = A2A1\_0 + A2A1\_r2;  
A2A2\_2 = A2A2\_0 + A2A2\_r2;  
A2D1\_2 = A2D1\_0 + A2D1\_r2;  
A2D2\_2 = A2D2\_0 + A2D2\_r2;  
A2D3\_2 = A2D3\_0 + A2D3\_r2;  
A2B1\_2 = A2B1\_0 + A2B1\_r2;  
A2B2\_2 = A2B2\_0 + A2B2\_r2;

D1A1\_2 = D1A1\_0 + D1A1\_r2;  
D1A2\_2 = D1A2\_0 + D1A2\_r2;  
D1D1\_2 = D1D1\_0 + D1D1\_r2;  
D1D2\_2 = D1D2\_0 + D1D2\_r2;  
D1D3\_2 = D1D3\_0 + D1D3\_r2;  
D1B1\_2 = D1B1\_0 + D1B1\_r2;  
D1B2\_2 = D1B2\_0 + D1B2\_r2;

D2A1\_2 = D2A1\_0 + D2A1\_r2;  
D2A2\_2 = D2A2\_0 + D2A2\_r2;  
D2D1\_2 = D2D1\_0 + D2D1\_r2;  
D2D2\_2 = D2D2\_0 + D2D2\_r2;

D2D3\_2 = D2D3\_0 + D2D3\_r2;  
D2B1\_2 = D2B1\_0 + D2B1\_r2;  
D2B2\_2 = D2B2\_0 + D2B2\_r2;

D3A1\_2 = D3A1\_0 + D3A1\_r2;  
D3A2\_2 = D3A2\_0 + D3A2\_r2;  
D3D1\_2 = D3D1\_0 + D3D1\_r2;  
D3D2\_2 = D3D2\_0 + D3D2\_r2;  
D3D3\_2 = D3D3\_0 + D3D3\_r2;  
D3B1\_2 = D3B1\_0 + D3B1\_r2;  
D3B2\_2 = D3B2\_0 + D3B2\_r2;

B1A1\_2 = B1A1\_0 + B1A1\_r2;  
B1A2\_2 = B1A2\_0 + B1A2\_r2;  
B1D1\_2 = B1D1\_0 + B1D1\_r2;  
B1D2\_2 = B1D2\_0 + B1D2\_r2;  
B1D3\_2 = B1D3\_0 + B1D3\_r2;  
B1B1\_2 = B1B1\_0 + B1B1\_r2;  
B1B2\_2 = B1B2\_0 + B1B2\_r2;

B2A1\_2 = B2A1\_0 + B2A1\_r2;  
B2A2\_2 = B2A2\_0 + B2A2\_r2;  
B2D1\_2 = B2D1\_0 + B2D1\_r2;  
B2D2\_2 = B2D2\_0 + B2D2\_r2;  
B2D3\_2 = B2D3\_0 + B2D3\_r2;  
B2B1\_2 = B2B1\_0 + B2B1\_r2;  
B2B2\_2 = B2B2\_0 + B2B2\_r2;

! Define every indirect effect per group

! indirect effects A1 group 0

NEW(A1A1A1\_0

A2A1A1\_0

D1A1A1\_0

D2A1A1\_0

D3A1A1\_0

B1A1A1\_0

B2A1A1\_0

A1A1A2\_0

A2A1A2\_0

D1A1A2\_0

D2A1A2\_0

D3A1A2\_0

B1A1A2\_0

B2A1A2\_0

A1A1D1\_0

A2A1D1\_0

D1A1D1\_0

D2A1D1\_0

D3A1D1\_0  
B1A1D1\_0  
B2A1D1\_0  
A1A1D2\_0  
A2A1D2\_0  
D1A1D2\_0  
D2A1D2\_0  
D3A1D2\_0  
B1A1D2\_0  
B2A1D2\_0  
A1A1D3\_0  
A2A1D3\_0  
D1A1D3\_0  
D2A1D3\_0  
D3A1D3\_0  
B1A1D3\_0  
B2A1D3\_0  
A1A1B1\_0  
A2A1B1\_0  
D1A1B1\_0  
D2A1B1\_0  
D3A1B1\_0  
B1A1B1\_0  
B2A1B1\_0  
A1A1B2\_0  
A2A1B2\_0  
D1A1B2\_0  
D2A1B2\_0  
D3A1B2\_0  
B1A1B2\_0  
B2A1B2\_0);  
A1A1A1\_0 = ((A1A1\_0)\*(A1A1\_0))\*1000 ;  
A2A1A1\_0 = ((A2A1\_0)\*(A1A1\_0))\*1000 ;  
D1A1A1\_0 = ((D1A1\_0)\*(A1A1\_0))\*1000 ;  
D2A1A1\_0 = ((D2A1\_0)\*(A1A1\_0))\*1000 ;  
D3A1A1\_0 = ((D3A1\_0)\*(A1A1\_0))\*1000 ;  
B1A1A1\_0 = ((B1A1\_0)\*(A1A1\_0))\*1000 ;  
B2A1A1\_0 = ((B2A1\_0)\*(A1A1\_0))\*1000 ;  
A1A1A2\_0 = ((A1A1\_0)\*(A1A2\_0))\*1000 ;  
A2A1A2\_0 = ((A2A1\_0)\*(A1A2\_0))\*1000 ;  
D1A1A2\_0 = ((D1A1\_0)\*(A1A2\_0))\*1000 ;  
D2A1A2\_0 = ((D2A1\_0)\*(A1A2\_0))\*1000 ;  
D3A1A2\_0 = ((D3A1\_0)\*(A1A2\_0))\*1000 ;  
B1A1A2\_0 = ((B1A1\_0)\*(A1A2\_0))\*1000 ;  
B2A1A2\_0 = ((B2A1\_0)\*(A1A2\_0))\*1000 ;  
A1A1D1\_0 = ((A1A1\_0)\*(A1D1\_0))\*1000 ;  
A2A1D1\_0 = ((A2A1\_0)\*(A1D1\_0))\*1000 ;  
D1A1D1\_0 = ((D1A1\_0)\*(A1D1\_0))\*1000 ;  
D2A1D1\_0 = ((D2A1\_0)\*(A1D1\_0))\*1000 ;

D3A1D1\_0 = ((D3A1\_0)\*(A1D1\_0))\*1000 ;  
B1A1D1\_0 = ((B1A1\_0)\*(A1D1\_0))\*1000 ;  
B2A1D1\_0 = ((B2A1\_0)\*(A1D1\_0))\*1000 ;  
A1A1D2\_0 = ((A1A1\_0)\*(A1D2\_0))\*1000 ;  
A2A1D2\_0 = ((A2A1\_0)\*(A1D2\_0))\*1000 ;  
D1A1D2\_0 = ((D1A1\_0)\*(A1D2\_0))\*1000 ;  
D2A1D2\_0 = ((D2A1\_0)\*(A1D2\_0))\*1000 ;  
D3A1D2\_0 = ((D3A1\_0)\*(A1D2\_0))\*1000 ;  
B1A1D2\_0 = ((B1A1\_0)\*(A1D2\_0))\*1000 ;  
B2A1D2\_0 = ((B2A1\_0)\*(A1D2\_0))\*1000 ;  
A1A1D3\_0 = ((A1A1\_0)\*(A1D3\_0))\*1000 ;  
A2A1D3\_0 = ((A2A1\_0)\*(A1D3\_0))\*1000 ;  
D1A1D3\_0 = ((D1A1\_0)\*(A1D3\_0))\*1000 ;  
D2A1D3\_0 = ((D2A1\_0)\*(A1D3\_0))\*1000 ;  
D3A1D3\_0 = ((D3A1\_0)\*(A1D3\_0))\*1000 ;  
B1A1D3\_0 = ((B1A1\_0)\*(A1D3\_0))\*1000 ;  
B2A1D3\_0 = ((B2A1\_0)\*(A1D3\_0))\*1000 ;  
A1A1B1\_0 = ((A1A1\_0)\*(A1B1\_0))\*1000 ;  
A2A1B1\_0 = ((A2A1\_0)\*(A1B1\_0))\*1000 ;  
D1A1B1\_0 = ((D1A1\_0)\*(A1B1\_0))\*1000 ;  
D2A1B1\_0 = ((D2A1\_0)\*(A1B1\_0))\*1000 ;  
D3A1B1\_0 = ((D3A1\_0)\*(A1B1\_0))\*1000 ;  
B1A1B1\_0 = ((B1A1\_0)\*(A1B1\_0))\*1000 ;  
B2A1B1\_0 = ((B2A1\_0)\*(A1B1\_0))\*1000 ;  
A1A1B2\_0 = ((A1A1\_0)\*(A1B2\_0))\*1000 ;  
A2A1B2\_0 = ((A2A1\_0)\*(A1B2\_0))\*1000 ;  
D1A1B2\_0 = ((D1A1\_0)\*(A1B2\_0))\*1000 ;  
D2A1B2\_0 = ((D2A1\_0)\*(A1B2\_0))\*1000 ;  
D3A1B2\_0 = ((D3A1\_0)\*(A1B2\_0))\*1000 ;  
B1A1B2\_0 = ((B1A1\_0)\*(A1B2\_0))\*1000 ;  
B2A1B2\_0 = ((B2A1\_0)\*(A1B2\_0))\*1000 ;

! indirect effects A1 group 1

NEW(A1A1A1\_1

A2A1A1\_1

D1A1A1\_1

D2A1A1\_1

D3A1A1\_1

B1A1A1\_1

B2A1A1\_1

A1A1A2\_1

A2A1A2\_1

D1A1A2\_1

D2A1A2\_1

D3A1A2\_1

B1A1A2\_1

B2A1A2\_1

A1A1D1\_1

A2A1D1\_1

D1A1D1\_1  
D2A1D1\_1  
D3A1D1\_1  
B1A1D1\_1  
B2A1D1\_1  
A1A1D2\_1  
A2A1D2\_1  
D1A1D2\_1  
D2A1D2\_1  
D3A1D2\_1  
B1A1D2\_1  
B2A1D2\_1  
A1A1D3\_1  
A2A1D3\_1  
D1A1D3\_1  
D2A1D3\_1  
D3A1D3\_1  
B1A1D3\_1  
B2A1D3\_1  
A1A1B1\_1  
A2A1B1\_1  
D1A1B1\_1  
D2A1B1\_1  
D3A1B1\_1  
B1A1B1\_1  
B2A1B1\_1  
A1A1B2\_1  
A2A1B2\_1  
D1A1B2\_1  
D2A1B2\_1  
D3A1B2\_1  
B1A1B2\_1  
B2A1B2\_1);  
A1A1A1\_1 = ((A1A1\_1)\*(A1A1\_1))\*1000 ;  
A2A1A1\_1 = ((A2A1\_1)\*(A1A1\_1))\*1000 ;  
D1A1A1\_1 = ((D1A1\_1)\*(A1A1\_1))\*1000 ;  
D2A1A1\_1 = ((D2A1\_1)\*(A1A1\_1))\*1000 ;  
D3A1A1\_1 = ((D3A1\_1)\*(A1A1\_1))\*1000 ;  
B1A1A1\_1 = ((B1A1\_1)\*(A1A1\_1))\*1000 ;  
B2A1A1\_1 = ((B2A1\_1)\*(A1A1\_1))\*1000 ;  
A1A1A2\_1 = ((A1A1\_1)\*(A1A2\_1))\*1000 ;  
A2A1A2\_1 = ((A2A1\_1)\*(A1A2\_1))\*1000 ;  
D1A1A2\_1 = ((D1A1\_1)\*(A1A2\_1))\*1000 ;  
D2A1A2\_1 = ((D2A1\_1)\*(A1A2\_1))\*1000 ;  
D3A1A2\_1 = ((D3A1\_1)\*(A1A2\_1))\*1000 ;  
B1A1A2\_1 = ((B1A1\_1)\*(A1A2\_1))\*1000 ;  
B2A1A2\_1 = ((B2A1\_1)\*(A1A2\_1))\*1000 ;  
A1A1D1\_1 = ((A1A1\_1)\*(A1D1\_1))\*1000 ;  
A2A1D1\_1 = ((A2A1\_1)\*(A1D1\_1))\*1000 ;

D1A1D1\_1 = ((D1A1\_1)\*(A1D1\_1))\*1000 ;  
D2A1D1\_1 = ((D2A1\_1)\*(A1D1\_1))\*1000 ;  
D3A1D1\_1 = ((D3A1\_1)\*(A1D1\_1))\*1000 ;  
B1A1D1\_1 = ((B1A1\_1)\*(A1D1\_1))\*1000 ;  
B2A1D1\_1 = ((B2A1\_1)\*(A1D1\_1))\*1000 ;  
A1A1D2\_1 = ((A1A1\_1)\*(A1D2\_1))\*1000 ;  
A2A1D2\_1 = ((A2A1\_1)\*(A1D2\_1))\*1000 ;  
D1A1D2\_1 = ((D1A1\_1)\*(A1D2\_1))\*1000 ;  
D2A1D2\_1 = ((D2A1\_1)\*(A1D2\_1))\*1000 ;  
D3A1D2\_1 = ((D3A1\_1)\*(A1D2\_1))\*1000 ;  
B1A1D2\_1 = ((B1A1\_1)\*(A1D2\_1))\*1000 ;  
B2A1D2\_1 = ((B2A1\_1)\*(A1D2\_1))\*1000 ;  
A1A1D3\_1 = ((A1A1\_1)\*(A1D3\_1))\*1000 ;  
A2A1D3\_1 = ((A2A1\_1)\*(A1D3\_1))\*1000 ;  
D1A1D3\_1 = ((D1A1\_1)\*(A1D3\_1))\*1000 ;  
D2A1D3\_1 = ((D2A1\_1)\*(A1D3\_1))\*1000 ;  
D3A1D3\_1 = ((D3A1\_1)\*(A1D3\_1))\*1000 ;  
B1A1D3\_1 = ((B1A1\_1)\*(A1D3\_1))\*1000 ;  
B2A1D3\_1 = ((B2A1\_1)\*(A1D3\_1))\*1000 ;  
A1A1B1\_1 = ((A1A1\_1)\*(A1B1\_1))\*1000 ;  
A2A1B1\_1 = ((A2A1\_1)\*(A1B1\_1))\*1000 ;  
D1A1B1\_1 = ((D1A1\_1)\*(A1B1\_1))\*1000 ;  
D2A1B1\_1 = ((D2A1\_1)\*(A1B1\_1))\*1000 ;  
D3A1B1\_1 = ((D3A1\_1)\*(A1B1\_1))\*1000 ;  
B1A1B1\_1 = ((B1A1\_1)\*(A1B1\_1))\*1000 ;  
B2A1B1\_1 = ((B2A1\_1)\*(A1B1\_1))\*1000 ;  
A1A1B2\_1 = ((A1A1\_1)\*(A1B2\_1))\*1000 ;  
A2A1B2\_1 = ((A2A1\_1)\*(A1B2\_1))\*1000 ;  
D1A1B2\_1 = ((D1A1\_1)\*(A1B2\_1))\*1000 ;  
D2A1B2\_1 = ((D2A1\_1)\*(A1B2\_1))\*1000 ;  
D3A1B2\_1 = ((D3A1\_1)\*(A1B2\_1))\*1000 ;  
B1A1B2\_1 = ((B1A1\_1)\*(A1B2\_1))\*1000 ;  
B2A1B2\_1 = ((B2A1\_1)\*(A1B2\_1))\*1000 ;

! indirect effects A1 group 2

NEW(A1A1A1\_2

A2A1A1\_2

D1A1A1\_2

D2A1A1\_2

D3A1A1\_2

B1A1A1\_2

B2A1A1\_2

A1A1A2\_2

A2A1A2\_2

D1A1A2\_2

D2A1A2\_2

D3A1A2\_2

B1A1A2\_2

B2A1A2\_2



A1A1D1\_2  
A2A1D1\_2  
D1A1D1\_2  
D2A1D1\_2  
D3A1D1\_2  
B1A1D1\_2  
B2A1D1\_2  
A1A1D2\_2  
A2A1D2\_2  
D1A1D2\_2  
D2A1D2\_2  
D3A1D2\_2  
B1A1D2\_2  
B2A1D2\_2  
A1A1D3\_2  
A2A1D3\_2  
D1A1D3\_2  
D2A1D3\_2  
D3A1D3\_2  
B1A1D3\_2  
B2A1D3\_2  
A1A1B1\_2  
A2A1B1\_2  
D1A1B1\_2  
D2A1B1\_2  
D3A1B1\_2  
B1A1B1\_2  
B2A1B1\_2  
A1A1B2\_2  
A2A1B2\_2  
D1A1B2\_2  
D2A1B2\_2  
D3A1B2\_2  
B1A1B2\_2  
B2A1B2\_2);  
A1A1A1\_2 = ((A1A1\_2)\*(A1A1\_2))\*1000 ;  
A2A1A1\_2 = ((A2A1\_2)\*(A1A1\_2))\*1000 ;  
D1A1A1\_2 = ((D1A1\_2)\*(A1A1\_2))\*1000 ;  
D2A1A1\_2 = ((D2A1\_2)\*(A1A1\_2))\*1000 ;  
D3A1A1\_2 = ((D3A1\_2)\*(A1A1\_2))\*1000 ;  
B1A1A1\_2 = ((B1A1\_2)\*(A1A1\_2))\*1000 ;  
B2A1A1\_2 = ((B2A1\_2)\*(A1A1\_2))\*1000 ;  
A1A1A2\_2 = ((A1A1\_2)\*(A1A2\_2))\*1000 ;  
A2A1A2\_2 = ((A2A1\_2)\*(A1A2\_2))\*1000 ;  
D1A1A2\_2 = ((D1A1\_2)\*(A1A2\_2))\*1000 ;  
D2A1A2\_2 = ((D2A1\_2)\*(A1A2\_2))\*1000 ;  
D3A1A2\_2 = ((D3A1\_2)\*(A1A2\_2))\*1000 ;  
B1A1A2\_2 = ((B1A1\_2)\*(A1A2\_2))\*1000 ;  
B2A1A2\_2 = ((B2A1\_2)\*(A1A2\_2))\*1000 ;

A1A1D1\_2 = ((A1A1\_2)\*(A1D1\_2))\*1000 ;  
A2A1D1\_2 = ((A2A1\_2)\*(A1D1\_2))\*1000 ;  
D1A1D1\_2 = ((D1A1\_2)\*(A1D1\_2))\*1000 ;  
D2A1D1\_2 = ((D2A1\_2)\*(A1D1\_2))\*1000 ;  
D3A1D1\_2 = ((D3A1\_2)\*(A1D1\_2))\*1000 ;  
B1A1D1\_2 = ((B1A1\_2)\*(A1D1\_2))\*1000 ;  
B2A1D1\_2 = ((B2A1\_2)\*(A1D1\_2))\*1000 ;  
A1A1D2\_2 = ((A1A1\_2)\*(A1D2\_2))\*1000 ;  
A2A1D2\_2 = ((A2A1\_2)\*(A1D2\_2))\*1000 ;  
D1A1D2\_2 = ((D1A1\_2)\*(A1D2\_2))\*1000 ;  
D2A1D2\_2 = ((D2A1\_2)\*(A1D2\_2))\*1000 ;  
D3A1D2\_2 = ((D3A1\_2)\*(A1D2\_2))\*1000 ;  
B1A1D2\_2 = ((B1A1\_2)\*(A1D2\_2))\*1000 ;  
B2A1D2\_2 = ((B2A1\_2)\*(A1D2\_2))\*1000 ;  
A1A1D3\_2 = ((A1A1\_2)\*(A1D3\_2))\*1000 ;  
A2A1D3\_2 = ((A2A1\_2)\*(A1D3\_2))\*1000 ;  
D1A1D3\_2 = ((D1A1\_2)\*(A1D3\_2))\*1000 ;  
D2A1D3\_2 = ((D2A1\_2)\*(A1D3\_2))\*1000 ;  
D3A1D3\_2 = ((D3A1\_2)\*(A1D3\_2))\*1000 ;  
B1A1D3\_2 = ((B1A1\_2)\*(A1D3\_2))\*1000 ;  
B2A1D3\_2 = ((B2A1\_2)\*(A1D3\_2))\*1000 ;  
A1A1B1\_2 = ((A1A1\_2)\*(A1B1\_2))\*1000 ;  
A2A1B1\_2 = ((A2A1\_2)\*(A1B1\_2))\*1000 ;  
D1A1B1\_2 = ((D1A1\_2)\*(A1B1\_2))\*1000 ;  
D2A1B1\_2 = ((D2A1\_2)\*(A1B1\_2))\*1000 ;  
D3A1B1\_2 = ((D3A1\_2)\*(A1B1\_2))\*1000 ;  
B1A1B1\_2 = ((B1A1\_2)\*(A1B1\_2))\*1000 ;  
B2A1B1\_2 = ((B2A1\_2)\*(A1B1\_2))\*1000 ;  
A1A1B2\_2 = ((A1A1\_2)\*(A1B2\_2))\*1000 ;  
A2A1B2\_2 = ((A2A1\_2)\*(A1B2\_2))\*1000 ;  
D1A1B2\_2 = ((D1A1\_2)\*(A1B2\_2))\*1000 ;  
D2A1B2\_2 = ((D2A1\_2)\*(A1B2\_2))\*1000 ;  
D3A1B2\_2 = ((D3A1\_2)\*(A1B2\_2))\*1000 ;  
B1A1B2\_2 = ((B1A1\_2)\*(A1B2\_2))\*1000 ;  
B2A1B2\_2 = ((B2A1\_2)\*(A1B2\_2))\*1000 ;

! indirect effects A2 group 0

NEW(A1A2A1\_0  
A2A2A1\_0  
D1A2A1\_0  
D2A2A1\_0  
D3A2A1\_0  
B1A2A1\_0  
B2A2A1\_0  
A1A2A2\_0  
A2A2A2\_0  
D1A2A2\_0  
D2A2A2\_0  
D3A2A2\_0

B1A2A2\_0  
B2A2A2\_0  
A1A2D1\_0  
A2A2D1\_0  
D1A2D1\_0  
D2A2D1\_0  
D3A2D1\_0  
B1A2D1\_0  
B2A2D1\_0  
A1A2D2\_0  
A2A2D2\_0  
D1A2D2\_0  
D2A2D2\_0  
D3A2D2\_0  
B1A2D2\_0  
B2A2D2\_0  
A1A2D3\_0  
A2A2D3\_0  
D1A2D3\_0  
D2A2D3\_0  
D3A2D3\_0  
B1A2D3\_0  
B2A2D3\_0  
A1A2B1\_0  
A2A2B1\_0  
D1A2B1\_0  
D2A2B1\_0  
D3A2B1\_0  
B1A2B1\_0  
B2A2B1\_0  
A1A2B2\_0  
A2A2B2\_0  
D1A2B2\_0  
D2A2B2\_0  
D3A2B2\_0  
B1A2B2\_0  
B2A2B2\_0);  
A1A2A1\_0 = ((A1A2\_0)\*(A2A1\_0))\*1000 ;  
A2A2A1\_0 = ((A2A2\_0)\*(A2A1\_0))\*1000 ;  
D1A2A1\_0 = ((D1A2\_0)\*(A2A1\_0))\*1000 ;  
D2A2A1\_0 = ((D2A2\_0)\*(A2A1\_0))\*1000 ;  
D3A2A1\_0 = ((D3A2\_0)\*(A2A1\_0))\*1000 ;  
B1A2A1\_0 = ((B1A2\_0)\*(A2A1\_0))\*1000 ;  
B2A2A1\_0 = ((B2A2\_0)\*(A2A1\_0))\*1000 ;  
A1A2A2\_0 = ((A1A2\_0)\*(A2A2\_0))\*1000 ;  
A2A2A2\_0 = ((A2A2\_0)\*(A2A2\_0))\*1000 ;  
D1A2A2\_0 = ((D1A2\_0)\*(A2A2\_0))\*1000 ;  
D2A2A2\_0 = ((D2A2\_0)\*(A2A2\_0))\*1000 ;  
D3A2A2\_0 = ((D3A2\_0)\*(A2A2\_0))\*1000 ;

B1A2A2\_0 = ((B1A2\_0)\*(A2A2\_0))\*1000 ;  
B2A2A2\_0 = ((B2A2\_0)\*(A2A2\_0))\*1000 ;  
A1A2D1\_0 = ((A1A2\_0)\*(A2D1\_0))\*1000 ;  
A2A2D1\_0 = ((A2A2\_0)\*(A2D1\_0))\*1000 ;  
D1A2D1\_0 = ((D1A2\_0)\*(A2D1\_0))\*1000 ;  
D2A2D1\_0 = ((D2A2\_0)\*(A2D1\_0))\*1000 ;  
D3A2D1\_0 = ((D3A2\_0)\*(A2D1\_0))\*1000 ;  
B1A2D1\_0 = ((B1A2\_0)\*(A2D1\_0))\*1000 ;  
B2A2D1\_0 = ((B2A2\_0)\*(A2D1\_0))\*1000 ;  
A1A2D2\_0 = ((A1A2\_0)\*(A2D2\_0))\*1000 ;  
A2A2D2\_0 = ((A2A2\_0)\*(A2D2\_0))\*1000 ;  
D1A2D2\_0 = ((D1A2\_0)\*(A2D2\_0))\*1000 ;  
D2A2D2\_0 = ((D2A2\_0)\*(A2D2\_0))\*1000 ;  
D3A2D2\_0 = ((D3A2\_0)\*(A2D2\_0))\*1000 ;  
B1A2D2\_0 = ((B1A2\_0)\*(A2D2\_0))\*1000 ;  
B2A2D2\_0 = ((B2A2\_0)\*(A2D2\_0))\*1000 ;  
A1A2D3\_0 = ((A1A2\_0)\*(A2D3\_0))\*1000 ;  
A2A2D3\_0 = ((A2A2\_0)\*(A2D3\_0))\*1000 ;  
D1A2D3\_0 = ((D1A2\_0)\*(A2D3\_0))\*1000 ;  
D2A2D3\_0 = ((D2A2\_0)\*(A2D3\_0))\*1000 ;  
D3A2D3\_0 = ((D3A2\_0)\*(A2D3\_0))\*1000 ;  
B1A2D3\_0 = ((B1A2\_0)\*(A2D3\_0))\*1000 ;  
B2A2D3\_0 = ((B2A2\_0)\*(A2D3\_0))\*1000 ;  
A1A2B1\_0 = ((A1A2\_0)\*(A2B1\_0))\*1000 ;  
A2A2B1\_0 = ((A2A2\_0)\*(A2B1\_0))\*1000 ;  
D1A2B1\_0 = ((D1A2\_0)\*(A2B1\_0))\*1000 ;  
D2A2B1\_0 = ((D2A2\_0)\*(A2B1\_0))\*1000 ;  
D3A2B1\_0 = ((D3A2\_0)\*(A2B1\_0))\*1000 ;  
B1A2B1\_0 = ((B1A2\_0)\*(A2B1\_0))\*1000 ;  
B2A2B1\_0 = ((B2A2\_0)\*(A2B1\_0))\*1000 ;  
A1A2B2\_0 = ((A1A2\_0)\*(A2B2\_0))\*1000 ;  
A2A2B2\_0 = ((A2A2\_0)\*(A2B2\_0))\*1000 ;  
D1A2B2\_0 = ((D1A2\_0)\*(A2B2\_0))\*1000 ;  
D2A2B2\_0 = ((D2A2\_0)\*(A2B2\_0))\*1000 ;  
D3A2B2\_0 = ((D3A2\_0)\*(A2B2\_0))\*1000 ;  
B1A2B2\_0 = ((B1A2\_0)\*(A2B2\_0))\*1000 ;  
B2A2B2\_0 = ((B2A2\_0)\*(A2B2\_0))\*1000 ;

! indirect effects A2 group 1

NEW(A1A2A1\_1  
A2A2A1\_1  
D1A2A1\_1  
D2A2A1\_1  
D3A2A1\_1  
B1A2A1\_1  
B2A2A1\_1  
A1A2A2\_1  
A2A2A2\_1  
D1A2A2\_1

D2A2A2\_1  
D3A2A2\_1  
B1A2A2\_1  
B2A2A2\_1  
A1A2D1\_1  
A2A2D1\_1  
D1A2D1\_1  
D2A2D1\_1  
D3A2D1\_1  
B1A2D1\_1  
B2A2D1\_1  
A1A2D2\_1  
A2A2D2\_1  
D1A2D2\_1  
D2A2D2\_1  
D3A2D2\_1  
B1A2D2\_1  
B2A2D2\_1  
A1A2D3\_1  
A2A2D3\_1  
D1A2D3\_1  
D2A2D3\_1  
D3A2D3\_1  
B1A2D3\_1  
B2A2D3\_1  
A1A2B1\_1  
A2A2B1\_1  
D1A2B1\_1  
D2A2B1\_1  
D3A2B1\_1  
B1A2B1\_1  
B2A2B1\_1  
A1A2B2\_1  
A2A2B2\_1  
D1A2B2\_1  
D2A2B2\_1  
D3A2B2\_1  
B1A2B2\_1  
B2A2B2\_1);

A1A2A1\_1 = ((A1A2\_1)\*(A2A1\_1))\*1000 ;  
A2A2A1\_1 = ((A2A2\_1)\*(A2A1\_1))\*1000 ;  
D1A2A1\_1 = ((D1A2\_1)\*(A2A1\_1))\*1000 ;  
D2A2A1\_1 = ((D2A2\_1)\*(A2A1\_1))\*1000 ;  
D3A2A1\_1 = ((D3A2\_1)\*(A2A1\_1))\*1000 ;  
B1A2A1\_1 = ((B1A2\_1)\*(A2A1\_1))\*1000 ;  
B2A2A1\_1 = ((B2A2\_1)\*(A2A1\_1))\*1000 ;  
A1A2A2\_1 = ((A1A2\_1)\*(A2A2\_1))\*1000 ;  
A2A2A2\_1 = ((A2A2\_1)\*(A2A2\_1))\*1000 ;  
D1A2A2\_1 = ((D1A2\_1)\*(A2A2\_1))\*1000 ;

D2A2A2\_1 = ((D2A2\_1)\*(A2A2\_1))\*1000 ;  
D3A2A2\_1 = ((D3A2\_1)\*(A2A2\_1))\*1000 ;  
B1A2A2\_1 = ((B1A2\_1)\*(A2A2\_1))\*1000 ;  
B2A2A2\_1 = ((B2A2\_1)\*(A2A2\_1))\*1000 ;  
A1A2D1\_1 = ((A1A2\_1)\*(A2D1\_1))\*1000 ;  
A2A2D1\_1 = ((A2A2\_1)\*(A2D1\_1))\*1000 ;  
D1A2D1\_1 = ((D1A2\_1)\*(A2D1\_1))\*1000 ;  
D2A2D1\_1 = ((D2A2\_1)\*(A2D1\_1))\*1000 ;  
D3A2D1\_1 = ((D3A2\_1)\*(A2D1\_1))\*1000 ;  
B1A2D1\_1 = ((B1A2\_1)\*(A2D1\_1))\*1000 ;  
B2A2D1\_1 = ((B2A2\_1)\*(A2D1\_1))\*1000 ;  
A1A2D2\_1 = ((A1A2\_1)\*(A2D2\_1))\*1000 ;  
A2A2D2\_1 = ((A2A2\_1)\*(A2D2\_1))\*1000 ;  
D1A2D2\_1 = ((D1A2\_1)\*(A2D2\_1))\*1000 ;  
D2A2D2\_1 = ((D2A2\_1)\*(A2D2\_1))\*1000 ;  
D3A2D2\_1 = ((D3A2\_1)\*(A2D2\_1))\*1000 ;  
B1A2D2\_1 = ((B1A2\_1)\*(A2D2\_1))\*1000 ;  
B2A2D2\_1 = ((B2A2\_1)\*(A2D2\_1))\*1000 ;  
A1A2D3\_1 = ((A1A2\_1)\*(A2D3\_1))\*1000 ;  
A2A2D3\_1 = ((A2A2\_1)\*(A2D3\_1))\*1000 ;  
D1A2D3\_1 = ((D1A2\_1)\*(A2D3\_1))\*1000 ;  
D2A2D3\_1 = ((D2A2\_1)\*(A2D3\_1))\*1000 ;  
D3A2D3\_1 = ((D3A2\_1)\*(A2D3\_1))\*1000 ;  
B1A2D3\_1 = ((B1A2\_1)\*(A2D3\_1))\*1000 ;  
B2A2D3\_1 = ((B2A2\_1)\*(A2D3\_1))\*1000 ;  
A1A2B1\_1 = ((A1A2\_1)\*(A2B1\_1))\*1000 ;  
A2A2B1\_1 = ((A2A2\_1)\*(A2B1\_1))\*1000 ;  
D1A2B1\_1 = ((D1A2\_1)\*(A2B1\_1))\*1000 ;  
D2A2B1\_1 = ((D2A2\_1)\*(A2B1\_1))\*1000 ;  
D3A2B1\_1 = ((D3A2\_1)\*(A2B1\_1))\*1000 ;  
B1A2B1\_1 = ((B1A2\_1)\*(A2B1\_1))\*1000 ;  
B2A2B1\_1 = ((B2A2\_1)\*(A2B1\_1))\*1000 ;  
A1A2B2\_1 = ((A1A2\_1)\*(A2B2\_1))\*1000 ;  
A2A2B2\_1 = ((A2A2\_1)\*(A2B2\_1))\*1000 ;  
D1A2B2\_1 = ((D1A2\_1)\*(A2B2\_1))\*1000 ;  
D2A2B2\_1 = ((D2A2\_1)\*(A2B2\_1))\*1000 ;  
D3A2B2\_1 = ((D3A2\_1)\*(A2B2\_1))\*1000 ;  
B1A2B2\_1 = ((B1A2\_1)\*(A2B2\_1))\*1000 ;  
B2A2B2\_1 = ((B2A2\_1)\*(A2B2\_1))\*1000 ;

! indirect effects A2 group 2

NEW(A1A2A1\_2  
A2A2A1\_2  
D1A2A1\_2  
D2A2A1\_2  
D3A2A1\_2  
B1A2A1\_2  
B2A2A1\_2  
A1A2A2\_2

A2A2A2\_2  
D1A2A2\_2  
D2A2A2\_2  
D3A2A2\_2  
B1A2A2\_2  
B2A2A2\_2  
A1A2D1\_2  
A2A2D1\_2  
D1A2D1\_2  
D2A2D1\_2  
D3A2D1\_2  
B1A2D1\_2  
B2A2D1\_2  
A1A2D2\_2  
A2A2D2\_2  
D1A2D2\_2  
D2A2D2\_2  
D3A2D2\_2  
B1A2D2\_2  
B2A2D2\_2  
A1A2D3\_2  
A2A2D3\_2  
D1A2D3\_2  
D2A2D3\_2  
D3A2D3\_2  
B1A2D3\_2  
B2A2D3\_2  
A1A2B1\_2  
A2A2B1\_2  
D1A2B1\_2  
D2A2B1\_2  
D3A2B1\_2  
B1A2B1\_2  
B2A2B1\_2  
A1A2B2\_2  
A2A2B2\_2  
D1A2B2\_2  
D2A2B2\_2  
D3A2B2\_2  
B1A2B2\_2  
B2A2B2\_2);

A1A2A1\_2 = ((A1A2\_2)\*(A2A1\_2))\*1000 ;  
A2A2A1\_2 = ((A2A2\_2)\*(A2A1\_2))\*1000 ;  
D1A2A1\_2 = ((D1A2\_2)\*(A2A1\_2))\*1000 ;  
D2A2A1\_2 = ((D2A2\_2)\*(A2A1\_2))\*1000 ;  
D3A2A1\_2 = ((D3A2\_2)\*(A2A1\_2))\*1000 ;  
B1A2A1\_2 = ((B1A2\_2)\*(A2A1\_2))\*1000 ;  
B2A2A1\_2 = ((B2A2\_2)\*(A2A1\_2))\*1000 ;  
A1A2A2\_2 = ((A1A2\_2)\*(A2A2\_2))\*1000 ;

A2A2A2\_2 = ((A2A2\_2)\*(A2A2\_2))\*1000 ;  
D1A2A2\_2 = ((D1A2\_2)\*(A2A2\_2))\*1000 ;  
D2A2A2\_2 = ((D2A2\_2)\*(A2A2\_2))\*1000 ;  
D3A2A2\_2 = ((D3A2\_2)\*(A2A2\_2))\*1000 ;  
B1A2A2\_2 = ((B1A2\_2)\*(A2A2\_2))\*1000 ;  
B2A2A2\_2 = ((B2A2\_2)\*(A2A2\_2))\*1000 ;  
A1A2D1\_2 = ((A1A2\_2)\*(A2D1\_2))\*1000 ;  
A2A2D1\_2 = ((A2A2\_2)\*(A2D1\_2))\*1000 ;  
D1A2D1\_2 = ((D1A2\_2)\*(A2D1\_2))\*1000 ;  
D2A2D1\_2 = ((D2A2\_2)\*(A2D1\_2))\*1000 ;  
D3A2D1\_2 = ((D3A2\_2)\*(A2D1\_2))\*1000 ;  
B1A2D1\_2 = ((B1A2\_2)\*(A2D1\_2))\*1000 ;  
B2A2D1\_2 = ((B2A2\_2)\*(A2D1\_2))\*1000 ;  
A1A2D2\_2 = ((A1A2\_2)\*(A2D2\_2))\*1000 ;  
A2A2D2\_2 = ((A2A2\_2)\*(A2D2\_2))\*1000 ;  
D1A2D2\_2 = ((D1A2\_2)\*(A2D2\_2))\*1000 ;  
D2A2D2\_2 = ((D2A2\_2)\*(A2D2\_2))\*1000 ;  
D3A2D2\_2 = ((D3A2\_2)\*(A2D2\_2))\*1000 ;  
B1A2D2\_2 = ((B1A2\_2)\*(A2D2\_2))\*1000 ;  
B2A2D2\_2 = ((B2A2\_2)\*(A2D2\_2))\*1000 ;  
A1A2D3\_2 = ((A1A2\_2)\*(A2D3\_2))\*1000 ;  
A2A2D3\_2 = ((A2A2\_2)\*(A2D3\_2))\*1000 ;  
D1A2D3\_2 = ((D1A2\_2)\*(A2D3\_2))\*1000 ;  
D2A2D3\_2 = ((D2A2\_2)\*(A2D3\_2))\*1000 ;  
D3A2D3\_2 = ((D3A2\_2)\*(A2D3\_2))\*1000 ;  
B1A2D3\_2 = ((B1A2\_2)\*(A2D3\_2))\*1000 ;  
B2A2D3\_2 = ((B2A2\_2)\*(A2D3\_2))\*1000 ;  
A1A2B1\_2 = ((A1A2\_2)\*(A2B1\_2))\*1000 ;  
A2A2B1\_2 = ((A2A2\_2)\*(A2B1\_2))\*1000 ;  
D1A2B1\_2 = ((D1A2\_2)\*(A2B1\_2))\*1000 ;  
D2A2B1\_2 = ((D2A2\_2)\*(A2B1\_2))\*1000 ;  
D3A2B1\_2 = ((D3A2\_2)\*(A2B1\_2))\*1000 ;  
B1A2B1\_2 = ((B1A2\_2)\*(A2B1\_2))\*1000 ;  
B2A2B1\_2 = ((B2A2\_2)\*(A2B1\_2))\*1000 ;  
A1A2B2\_2 = ((A1A2\_2)\*(A2B2\_2))\*1000 ;  
A2A2B2\_2 = ((A2A2\_2)\*(A2B2\_2))\*1000 ;  
D1A2B2\_2 = ((D1A2\_2)\*(A2B2\_2))\*1000 ;  
D2A2B2\_2 = ((D2A2\_2)\*(A2B2\_2))\*1000 ;  
D3A2B2\_2 = ((D3A2\_2)\*(A2B2\_2))\*1000 ;  
B1A2B2\_2 = ((B1A2\_2)\*(A2B2\_2))\*1000 ;  
B2A2B2\_2 = ((B2A2\_2)\*(A2B2\_2))\*1000 ;

! indirect effects D1 group 0

NEW(A1D1A1\_0

A2D1A1\_0

D1D1A1\_0

D2D1A1\_0

D3D1A1\_0

B1D1A1\_0



B2D1A1\_0  
A1D1A2\_0  
A2D1A2\_0  
D1D1A2\_0  
D2D1A2\_0  
D3D1A2\_0  
B1D1A2\_0  
B2D1A2\_0  
A1D1D1\_0  
A2D1D1\_0  
D1D1D1\_0  
D2D1D1\_0  
D3D1D1\_0  
B1D1D1\_0  
B2D1D1\_0  
A1D1D2\_0  
A2D1D2\_0  
D1D1D2\_0  
D2D1D2\_0  
D3D1D2\_0  
B1D1D2\_0  
B2D1D2\_0  
A1D1D3\_0  
A2D1D3\_0  
D1D1D3\_0  
D2D1D3\_0  
D3D1D3\_0  
B1D1D3\_0  
B2D1D3\_0  
A1D1B1\_0  
A2D1B1\_0  
D1D1B1\_0  
D2D1B1\_0  
D3D1B1\_0  
B1D1B1\_0  
B2D1B1\_0  
A1D1B2\_0  
A2D1B2\_0  
D1D1B2\_0  
D2D1B2\_0  
D3D1B2\_0  
B1D1B2\_0  
B2D1B2\_0);  
A1D1A1\_0 = ((A1D1\_0)\*(D1A1\_0))\*1000 ;  
A2D1A1\_0 = ((A2D1\_0)\*(D1A1\_0))\*1000 ;  
D1D1A1\_0 = ((D1D1\_0)\*(D1A1\_0))\*1000 ;  
D2D1A1\_0 = ((D2D1\_0)\*(D1A1\_0))\*1000 ;  
D3D1A1\_0 = ((D3D1\_0)\*(D1A1\_0))\*1000 ;  
B1D1A1\_0 = ((B1D1\_0)\*(D1A1\_0))\*1000 ;

B2D1A1\_0 = ((B2D1\_0)\*(D1A1\_0))\*1000 ;  
A1D1A2\_0 = ((A1D1\_0)\*(D1A2\_0))\*1000 ;  
A2D1A2\_0 = ((A2D1\_0)\*(D1A2\_0))\*1000 ;  
D1D1A2\_0 = ((D1D1\_0)\*(D1A2\_0))\*1000 ;  
D2D1A2\_0 = ((D2D1\_0)\*(D1A2\_0))\*1000 ;  
D3D1A2\_0 = ((D3D1\_0)\*(D1A2\_0))\*1000 ;  
B1D1A2\_0 = ((B1D1\_0)\*(D1A2\_0))\*1000 ;  
B2D1A2\_0 = ((B2D1\_0)\*(D1A2\_0))\*1000 ;  
A1D1D1\_0 = ((A1D1\_0)\*(D1D1\_0))\*1000 ;  
A2D1D1\_0 = ((A2D1\_0)\*(D1D1\_0))\*1000 ;  
D1D1D1\_0 = ((D1D1\_0)\*(D1D1\_0))\*1000 ;  
D2D1D1\_0 = ((D2D1\_0)\*(D1D1\_0))\*1000 ;  
D3D1D1\_0 = ((D3D1\_0)\*(D1D1\_0))\*1000 ;  
B1D1D1\_0 = ((B1D1\_0)\*(D1D1\_0))\*1000 ;  
B2D1D1\_0 = ((B2D1\_0)\*(D1D1\_0))\*1000 ;  
A1D1D2\_0 = ((A1D1\_0)\*(D1D2\_0))\*1000 ;  
A2D1D2\_0 = ((A2D1\_0)\*(D1D2\_0))\*1000 ;  
D1D1D2\_0 = ((D1D1\_0)\*(D1D2\_0))\*1000 ;  
D2D1D2\_0 = ((D2D1\_0)\*(D1D2\_0))\*1000 ;  
D3D1D2\_0 = ((D3D1\_0)\*(D1D2\_0))\*1000 ;  
B1D1D2\_0 = ((B1D1\_0)\*(D1D2\_0))\*1000 ;  
B2D1D2\_0 = ((B2D1\_0)\*(D1D2\_0))\*1000 ;  
A1D1D3\_0 = ((A1D1\_0)\*(D1D3\_0))\*1000 ;  
A2D1D3\_0 = ((A2D1\_0)\*(D1D3\_0))\*1000 ;  
D1D1D3\_0 = ((D1D1\_0)\*(D1D3\_0))\*1000 ;  
D2D1D3\_0 = ((D2D1\_0)\*(D1D3\_0))\*1000 ;  
D3D1D3\_0 = ((D3D1\_0)\*(D1D3\_0))\*1000 ;  
B1D1D3\_0 = ((B1D1\_0)\*(D1D3\_0))\*1000 ;  
B2D1D3\_0 = ((B2D1\_0)\*(D1D3\_0))\*1000 ;  
A1D1B1\_0 = ((A1D1\_0)\*(D1B1\_0))\*1000 ;  
A2D1B1\_0 = ((A2D1\_0)\*(D1B1\_0))\*1000 ;  
D1D1B1\_0 = ((D1D1\_0)\*(D1B1\_0))\*1000 ;  
D2D1B1\_0 = ((D2D1\_0)\*(D1B1\_0))\*1000 ;  
D3D1B1\_0 = ((D3D1\_0)\*(D1B1\_0))\*1000 ;  
B1D1B1\_0 = ((B1D1\_0)\*(D1B1\_0))\*1000 ;  
B2D1B1\_0 = ((B2D1\_0)\*(D1B1\_0))\*1000 ;  
A1D1B2\_0 = ((A1D1\_0)\*(D1B2\_0))\*1000 ;  
A2D1B2\_0 = ((A2D1\_0)\*(D1B2\_0))\*1000 ;  
D1D1B2\_0 = ((D1D1\_0)\*(D1B2\_0))\*1000 ;  
D2D1B2\_0 = ((D2D1\_0)\*(D1B2\_0))\*1000 ;  
D3D1B2\_0 = ((D3D1\_0)\*(D1B2\_0))\*1000 ;  
B1D1B2\_0 = ((B1D1\_0)\*(D1B2\_0))\*1000 ;  
B2D1B2\_0 = ((B2D1\_0)\*(D1B2\_0))\*1000 ;

! indirect effects D1 group 1

NEW(A1D1A1\_1

A2D1A1\_1

D1D1A1\_1

D2D1A1\_1

D3D1A1\_1  
B1D1A1\_1  
B2D1A1\_1  
A1D1A2\_1  
A2D1A2\_1  
D1D1A2\_1  
D2D1A2\_1  
D3D1A2\_1  
B1D1A2\_1  
B2D1A2\_1  
A1D1D1\_1  
A2D1D1\_1  
D1D1D1\_1  
D2D1D1\_1  
D3D1D1\_1  
B1D1D1\_1  
B2D1D1\_1  
A1D1D2\_1  
A2D1D2\_1  
D1D1D2\_1  
D2D1D2\_1  
D3D1D2\_1  
B1D1D2\_1  
B2D1D2\_1  
A1D1D3\_1  
A2D1D3\_1  
D1D1D3\_1  
D2D1D3\_1  
D3D1D3\_1  
B1D1D3\_1  
B2D1D3\_1  
A1D1B1\_1  
A2D1B1\_1  
D1D1B1\_1  
D2D1B1\_1  
D3D1B1\_1  
B1D1B1\_1  
B2D1B1\_1  
A1D1B2\_1  
A2D1B2\_1  
D1D1B2\_1  
D2D1B2\_1  
D3D1B2\_1  
B1D1B2\_1  
B2D1B2\_1);  
A1D1A1\_1 = ((A1D1\_1)\*(D1A1\_1))\*1000 ;  
A2D1A1\_1 = ((A2D1\_1)\*(D1A1\_1))\*1000 ;  
D1D1A1\_1 = ((D1D1\_1)\*(D1A1\_1))\*1000 ;  
D2D1A1\_1 = ((D2D1\_1)\*(D1A1\_1))\*1000 ;

D3D1A1\_1 = ((D3D1\_1)\*(D1A1\_1))\*1000 ;  
B1D1A1\_1 = ((B1D1\_1)\*(D1A1\_1))\*1000 ;  
B2D1A1\_1 = ((B2D1\_1)\*(D1A1\_1))\*1000 ;  
A1D1A2\_1 = ((A1D1\_1)\*(D1A2\_1))\*1000 ;  
A2D1A2\_1 = ((A2D1\_1)\*(D1A2\_1))\*1000 ;  
D1D1A2\_1 = ((D1D1\_1)\*(D1A2\_1))\*1000 ;  
D2D1A2\_1 = ((D2D1\_1)\*(D1A2\_1))\*1000 ;  
D3D1A2\_1 = ((D3D1\_1)\*(D1A2\_1))\*1000 ;  
B1D1A2\_1 = ((B1D1\_1)\*(D1A2\_1))\*1000 ;  
B2D1A2\_1 = ((B2D1\_1)\*(D1A2\_1))\*1000 ;  
A1D1D1\_1 = ((A1D1\_1)\*(D1D1\_1))\*1000 ;  
A2D1D1\_1 = ((A2D1\_1)\*(D1D1\_1))\*1000 ;  
D1D1D1\_1 = ((D1D1\_1)\*(D1D1\_1))\*1000 ;  
D2D1D1\_1 = ((D2D1\_1)\*(D1D1\_1))\*1000 ;  
D3D1D1\_1 = ((D3D1\_1)\*(D1D1\_1))\*1000 ;  
B1D1D1\_1 = ((B1D1\_1)\*(D1D1\_1))\*1000 ;  
B2D1D1\_1 = ((B2D1\_1)\*(D1D1\_1))\*1000 ;  
A1D1D2\_1 = ((A1D1\_1)\*(D1D2\_1))\*1000 ;  
A2D1D2\_1 = ((A2D1\_1)\*(D1D2\_1))\*1000 ;  
D1D1D2\_1 = ((D1D1\_1)\*(D1D2\_1))\*1000 ;  
D2D1D2\_1 = ((D2D1\_1)\*(D1D2\_1))\*1000 ;  
D3D1D2\_1 = ((D3D1\_1)\*(D1D2\_1))\*1000 ;  
B1D1D2\_1 = ((B1D1\_1)\*(D1D2\_1))\*1000 ;  
B2D1D2\_1 = ((B2D1\_1)\*(D1D2\_1))\*1000 ;  
A1D1D3\_1 = ((A1D1\_1)\*(D1D3\_1))\*1000 ;  
A2D1D3\_1 = ((A2D1\_1)\*(D1D3\_1))\*1000 ;  
D1D1D3\_1 = ((D1D1\_1)\*(D1D3\_1))\*1000 ;  
D2D1D3\_1 = ((D2D1\_1)\*(D1D3\_1))\*1000 ;  
D3D1D3\_1 = ((D3D1\_1)\*(D1D3\_1))\*1000 ;  
B1D1D3\_1 = ((B1D1\_1)\*(D1D3\_1))\*1000 ;  
B2D1D3\_1 = ((B2D1\_1)\*(D1D3\_1))\*1000 ;  
A1D1B1\_1 = ((A1D1\_1)\*(D1B1\_1))\*1000 ;  
A2D1B1\_1 = ((A2D1\_1)\*(D1B1\_1))\*1000 ;  
D1D1B1\_1 = ((D1D1\_1)\*(D1B1\_1))\*1000 ;  
D2D1B1\_1 = ((D2D1\_1)\*(D1B1\_1))\*1000 ;  
D3D1B1\_1 = ((D3D1\_1)\*(D1B1\_1))\*1000 ;  
B1D1B1\_1 = ((B1D1\_1)\*(D1B1\_1))\*1000 ;  
B2D1B1\_1 = ((B2D1\_1)\*(D1B1\_1))\*1000 ;  
A1D1B2\_1 = ((A1D1\_1)\*(D1B2\_1))\*1000 ;  
A2D1B2\_1 = ((A2D1\_1)\*(D1B2\_1))\*1000 ;  
D1D1B2\_1 = ((D1D1\_1)\*(D1B2\_1))\*1000 ;  
D2D1B2\_1 = ((D2D1\_1)\*(D1B2\_1))\*1000 ;  
D3D1B2\_1 = ((D3D1\_1)\*(D1B2\_1))\*1000 ;  
B1D1B2\_1 = ((B1D1\_1)\*(D1B2\_1))\*1000 ;  
B2D1B2\_1 = ((B2D1\_1)\*(D1B2\_1))\*1000 ;

! indirect effects D1 group 2

NEW(A1D1A1\_2

A2D1A1\_2

D1D1A1\_2  
D2D1A1\_2  
D3D1A1\_2  
B1D1A1\_2  
B2D1A1\_2  
A1D1A2\_2  
A2D1A2\_2  
D1D1A2\_2  
D2D1A2\_2  
D3D1A2\_2  
B1D1A2\_2  
B2D1A2\_2  
A1D1D1\_2  
A2D1D1\_2  
D1D1D1\_2  
D2D1D1\_2  
D3D1D1\_2  
B1D1D1\_2  
B2D1D1\_2  
A1D1D2\_2  
A2D1D2\_2  
D1D1D2\_2  
D2D1D2\_2  
D3D1D2\_2  
B1D1D2\_2  
B2D1D2\_2  
A1D1D3\_2  
A2D1D3\_2  
D1D1D3\_2  
D2D1D3\_2  
D3D1D3\_2  
B1D1D3\_2  
B2D1D3\_2  
A1D1B1\_2  
A2D1B1\_2  
D1D1B1\_2  
D2D1B1\_2  
D3D1B1\_2  
B1D1B1\_2  
B2D1B1\_2  
A1D1B2\_2  
A2D1B2\_2  
D1D1B2\_2  
D2D1B2\_2  
D3D1B2\_2  
B1D1B2\_2  
B2D1B2\_2);  
A1D1A1\_2 = ((A1D1\_2)\*(D1A1\_2))\*1000 ;  
A2D1A1\_2 = ((A2D1\_2)\*(D1A1\_2))\*1000 ;

D1D1A1\_2 = ((D1D1\_2)\*(D1A1\_2))\*1000 ;  
D2D1A1\_2 = ((D2D1\_2)\*(D1A1\_2))\*1000 ;  
D3D1A1\_2 = ((D3D1\_2)\*(D1A1\_2))\*1000 ;  
B1D1A1\_2 = ((B1D1\_2)\*(D1A1\_2))\*1000 ;  
B2D1A1\_2 = ((B2D1\_2)\*(D1A1\_2))\*1000 ;  
A1D1A2\_2 = ((A1D1\_2)\*(D1A2\_2))\*1000 ;  
A2D1A2\_2 = ((A2D1\_2)\*(D1A2\_2))\*1000 ;  
D1D1A2\_2 = ((D1D1\_2)\*(D1A2\_2))\*1000 ;  
D2D1A2\_2 = ((D2D1\_2)\*(D1A2\_2))\*1000 ;  
D3D1A2\_2 = ((D3D1\_2)\*(D1A2\_2))\*1000 ;  
B1D1A2\_2 = ((B1D1\_2)\*(D1A2\_2))\*1000 ;  
B2D1A2\_2 = ((B2D1\_2)\*(D1A2\_2))\*1000 ;  
A1D1D1\_2 = ((A1D1\_2)\*(D1D1\_2))\*1000 ;  
A2D1D1\_2 = ((A2D1\_2)\*(D1D1\_2))\*1000 ;  
D1D1D1\_2 = ((D1D1\_2)\*(D1D1\_2))\*1000 ;  
D2D1D1\_2 = ((D2D1\_2)\*(D1D1\_2))\*1000 ;  
D3D1D1\_2 = ((D3D1\_2)\*(D1D1\_2))\*1000 ;  
B1D1D1\_2 = ((B1D1\_2)\*(D1D1\_2))\*1000 ;  
B2D1D1\_2 = ((B2D1\_2)\*(D1D1\_2))\*1000 ;  
A1D1D2\_2 = ((A1D1\_2)\*(D1D2\_2))\*1000 ;  
A2D1D2\_2 = ((A2D1\_2)\*(D1D2\_2))\*1000 ;  
D1D1D2\_2 = ((D1D1\_2)\*(D1D2\_2))\*1000 ;  
D2D1D2\_2 = ((D2D1\_2)\*(D1D2\_2))\*1000 ;  
D3D1D2\_2 = ((D3D1\_2)\*(D1D2\_2))\*1000 ;  
B1D1D2\_2 = ((B1D1\_2)\*(D1D2\_2))\*1000 ;  
B2D1D2\_2 = ((B2D1\_2)\*(D1D2\_2))\*1000 ;  
A1D1D3\_2 = ((A1D1\_2)\*(D1D3\_2))\*1000 ;  
A2D1D3\_2 = ((A2D1\_2)\*(D1D3\_2))\*1000 ;  
D1D1D3\_2 = ((D1D1\_2)\*(D1D3\_2))\*1000 ;  
D2D1D3\_2 = ((D2D1\_2)\*(D1D3\_2))\*1000 ;  
D3D1D3\_2 = ((D3D1\_2)\*(D1D3\_2))\*1000 ;  
B1D1D3\_2 = ((B1D1\_2)\*(D1D3\_2))\*1000 ;  
B2D1D3\_2 = ((B2D1\_2)\*(D1D3\_2))\*1000 ;  
A1D1B1\_2 = ((A1D1\_2)\*(D1B1\_2))\*1000 ;  
A2D1B1\_2 = ((A2D1\_2)\*(D1B1\_2))\*1000 ;  
D1D1B1\_2 = ((D1D1\_2)\*(D1B1\_2))\*1000 ;  
D2D1B1\_2 = ((D2D1\_2)\*(D1B1\_2))\*1000 ;  
D3D1B1\_2 = ((D3D1\_2)\*(D1B1\_2))\*1000 ;  
B1D1B1\_2 = ((B1D1\_2)\*(D1B1\_2))\*1000 ;  
B2D1B1\_2 = ((B2D1\_2)\*(D1B1\_2))\*1000 ;  
A1D1B2\_2 = ((A1D1\_2)\*(D1B2\_2))\*1000 ;  
A2D1B2\_2 = ((A2D1\_2)\*(D1B2\_2))\*1000 ;  
D1D1B2\_2 = ((D1D1\_2)\*(D1B2\_2))\*1000 ;  
D2D1B2\_2 = ((D2D1\_2)\*(D1B2\_2))\*1000 ;  
D3D1B2\_2 = ((D3D1\_2)\*(D1B2\_2))\*1000 ;  
B1D1B2\_2 = ((B1D1\_2)\*(D1B2\_2))\*1000 ;  
B2D1B2\_2 = ((B2D1\_2)\*(D1B2\_2))\*1000 ;

! indirect effects D2 group 0

NEW(A1D2A1\_0  
A2D2A1\_0  
D1D2A1\_0  
D2D2A1\_0  
D3D2A1\_0  
B1D2A1\_0  
B2D2A1\_0  
A1D2A2\_0  
A2D2A2\_0  
D1D2A2\_0  
D2D2A2\_0  
D3D2A2\_0  
B1D2A2\_0  
B2D2A2\_0  
A1D2D1\_0  
A2D2D1\_0  
D1D2D1\_0  
D2D2D1\_0  
D3D2D1\_0  
B1D2D1\_0  
B2D2D1\_0  
A1D2D2\_0  
A2D2D2\_0  
D1D2D2\_0  
D2D2D2\_0  
D3D2D2\_0  
B1D2D2\_0  
B2D2D2\_0  
A1D2D3\_0  
A2D2D3\_0  
D1D2D3\_0  
D2D2D3\_0  
D3D2D3\_0  
B1D2D3\_0  
B2D2D3\_0  
A1D2B1\_0  
A2D2B1\_0  
D1D2B1\_0  
D2D2B1\_0  
D3D2B1\_0  
B1D2B1\_0  
B2D2B1\_0  
A1D2B2\_0  
A2D2B2\_0  
D1D2B2\_0  
D2D2B2\_0  
D3D2B2\_0  
B1D2B2\_0  
B2D2B2\_0);

A1D2A1\_0 = ((A1D2\_0)\*(D2A1\_0))\*1000 ;  
A2D2A1\_0 = ((A2D2\_0)\*(D2A1\_0))\*1000 ;  
D1D2A1\_0 = ((D1D2\_0)\*(D2A1\_0))\*1000 ;  
D2D2A1\_0 = ((D2D2\_0)\*(D2A1\_0))\*1000 ;  
D3D2A1\_0 = ((D3D2\_0)\*(D2A1\_0))\*1000 ;  
B1D2A1\_0 = ((B1D2\_0)\*(D2A1\_0))\*1000 ;  
B2D2A1\_0 = ((B2D2\_0)\*(D2A1\_0))\*1000 ;  
A1D2A2\_0 = ((A1D2\_0)\*(D2A2\_0))\*1000 ;  
A2D2A2\_0 = ((A2D2\_0)\*(D2A2\_0))\*1000 ;  
D1D2A2\_0 = ((D1D2\_0)\*(D2A2\_0))\*1000 ;  
D2D2A2\_0 = ((D2D2\_0)\*(D2A2\_0))\*1000 ;  
D3D2A2\_0 = ((D3D2\_0)\*(D2A2\_0))\*1000 ;  
B1D2A2\_0 = ((B1D2\_0)\*(D2A2\_0))\*1000 ;  
B2D2A2\_0 = ((B2D2\_0)\*(D2A2\_0))\*1000 ;  
A1D2D1\_0 = ((A1D2\_0)\*(D2D1\_0))\*1000 ;  
A2D2D1\_0 = ((A2D2\_0)\*(D2D1\_0))\*1000 ;  
D1D2D1\_0 = ((D1D2\_0)\*(D2D1\_0))\*1000 ;  
D2D2D1\_0 = ((D2D2\_0)\*(D2D1\_0))\*1000 ;  
D3D2D1\_0 = ((D3D2\_0)\*(D2D1\_0))\*1000 ;  
B1D2D1\_0 = ((B1D2\_0)\*(D2D1\_0))\*1000 ;  
B2D2D1\_0 = ((B2D2\_0)\*(D2D1\_0))\*1000 ;  
A1D2D2\_0 = ((A1D2\_0)\*(D2D2\_0))\*1000 ;  
A2D2D2\_0 = ((A2D2\_0)\*(D2D2\_0))\*1000 ;  
D1D2D2\_0 = ((D1D2\_0)\*(D2D2\_0))\*1000 ;  
D2D2D2\_0 = ((D2D2\_0)\*(D2D2\_0))\*1000 ;  
D3D2D2\_0 = ((D3D2\_0)\*(D2D2\_0))\*1000 ;  
B1D2D2\_0 = ((B1D2\_0)\*(D2D2\_0))\*1000 ;  
B2D2D2\_0 = ((B2D2\_0)\*(D2D2\_0))\*1000 ;  
A1D2D3\_0 = ((A1D2\_0)\*(D2D3\_0))\*1000 ;  
A2D2D3\_0 = ((A2D2\_0)\*(D2D3\_0))\*1000 ;  
D1D2D3\_0 = ((D1D2\_0)\*(D2D3\_0))\*1000 ;  
D2D2D3\_0 = ((D2D2\_0)\*(D2D3\_0))\*1000 ;  
D3D2D3\_0 = ((D3D2\_0)\*(D2D3\_0))\*1000 ;  
B1D2D3\_0 = ((B1D2\_0)\*(D2D3\_0))\*1000 ;  
B2D2D3\_0 = ((B2D2\_0)\*(D2D3\_0))\*1000 ;  
A1D2B1\_0 = ((A1D2\_0)\*(D2B1\_0))\*1000 ;  
A2D2B1\_0 = ((A2D2\_0)\*(D2B1\_0))\*1000 ;  
D1D2B1\_0 = ((D1D2\_0)\*(D2B1\_0))\*1000 ;  
D2D2B1\_0 = ((D2D2\_0)\*(D2B1\_0))\*1000 ;  
D3D2B1\_0 = ((D3D2\_0)\*(D2B1\_0))\*1000 ;  
B1D2B1\_0 = ((B1D2\_0)\*(D2B1\_0))\*1000 ;  
B2D2B1\_0 = ((B2D2\_0)\*(D2B1\_0))\*1000 ;  
A1D2B2\_0 = ((A1D2\_0)\*(D2B2\_0))\*1000 ;  
A2D2B2\_0 = ((A2D2\_0)\*(D2B2\_0))\*1000 ;  
D1D2B2\_0 = ((D1D2\_0)\*(D2B2\_0))\*1000 ;  
D2D2B2\_0 = ((D2D2\_0)\*(D2B2\_0))\*1000 ;  
D3D2B2\_0 = ((D3D2\_0)\*(D2B2\_0))\*1000 ;  
B1D2B2\_0 = ((B1D2\_0)\*(D2B2\_0))\*1000 ;  
B2D2B2\_0 = ((B2D2\_0)\*(D2B2\_0))\*1000 ;



! indirect effects D2 group 1

NEW(A1D2A1\_1

A2D2A1\_1

D1D2A1\_1

D2D2A1\_1

D3D2A1\_1

B1D2A1\_1

B2D2A1\_1

A1D2A2\_1

A2D2A2\_1

D1D2A2\_1

D2D2A2\_1

D3D2A2\_1

B1D2A2\_1

B2D2A2\_1

A1D2D1\_1

A2D2D1\_1

D1D2D1\_1

D2D2D1\_1

D3D2D1\_1

B1D2D1\_1

B2D2D1\_1

A1D2D2\_1

A2D2D2\_1

D1D2D2\_1

D2D2D2\_1

D3D2D2\_1

B1D2D2\_1

B2D2D2\_1

A1D2D3\_1

A2D2D3\_1

D1D2D3\_1

D2D2D3\_1

D3D2D3\_1

B1D2D3\_1

B2D2D3\_1

A1D2B1\_1

A2D2B1\_1

D1D2B1\_1

D2D2B1\_1

D3D2B1\_1

B1D2B1\_1

B2D2B1\_1

A1D2B2\_1

A2D2B2\_1

D1D2B2\_1

D2D2B2\_1

D3D2B2\_1

B1D2B2\_1  
B2D2B2\_1);  
A1D2A1\_1 = ((A1D2\_1)\*(D2A1\_1))\*1000 ;  
A2D2A1\_1 = ((A2D2\_1)\*(D2A1\_1))\*1000 ;  
D1D2A1\_1 = ((D1D2\_1)\*(D2A1\_1))\*1000 ;  
D2D2A1\_1 = ((D2D2\_1)\*(D2A1\_1))\*1000 ;  
D3D2A1\_1 = ((D3D2\_1)\*(D2A1\_1))\*1000 ;  
B1D2A1\_1 = ((B1D2\_1)\*(D2A1\_1))\*1000 ;  
B2D2A1\_1 = ((B2D2\_1)\*(D2A1\_1))\*1000 ;  
A1D2A2\_1 = ((A1D2\_1)\*(D2A2\_1))\*1000 ;  
A2D2A2\_1 = ((A2D2\_1)\*(D2A2\_1))\*1000 ;  
D1D2A2\_1 = ((D1D2\_1)\*(D2A2\_1))\*1000 ;  
D2D2A2\_1 = ((D2D2\_1)\*(D2A2\_1))\*1000 ;  
D3D2A2\_1 = ((D3D2\_1)\*(D2A2\_1))\*1000 ;  
B1D2A2\_1 = ((B1D2\_1)\*(D2A2\_1))\*1000 ;  
B2D2A2\_1 = ((B2D2\_1)\*(D2A2\_1))\*1000 ;  
A1D2D1\_1 = ((A1D2\_1)\*(D2D1\_1))\*1000 ;  
A2D2D1\_1 = ((A2D2\_1)\*(D2D1\_1))\*1000 ;  
D1D2D1\_1 = ((D1D2\_1)\*(D2D1\_1))\*1000 ;  
D2D2D1\_1 = ((D2D2\_1)\*(D2D1\_1))\*1000 ;  
D3D2D1\_1 = ((D3D2\_1)\*(D2D1\_1))\*1000 ;  
B1D2D1\_1 = ((B1D2\_1)\*(D2D1\_1))\*1000 ;  
B2D2D1\_1 = ((B2D2\_1)\*(D2D1\_1))\*1000 ;  
A1D2D2\_1 = ((A1D2\_1)\*(D2D2\_1))\*1000 ;  
A2D2D2\_1 = ((A2D2\_1)\*(D2D2\_1))\*1000 ;  
D1D2D2\_1 = ((D1D2\_1)\*(D2D2\_1))\*1000 ;  
D2D2D2\_1 = ((D2D2\_1)\*(D2D2\_1))\*1000 ;  
D3D2D2\_1 = ((D3D2\_1)\*(D2D2\_1))\*1000 ;  
B1D2D2\_1 = ((B1D2\_1)\*(D2D2\_1))\*1000 ;  
B2D2D2\_1 = ((B2D2\_1)\*(D2D2\_1))\*1000 ;  
A1D2D3\_1 = ((A1D2\_1)\*(D2D3\_1))\*1000 ;  
A2D2D3\_1 = ((A2D2\_1)\*(D2D3\_1))\*1000 ;  
D1D2D3\_1 = ((D1D2\_1)\*(D2D3\_1))\*1000 ;  
D2D2D3\_1 = ((D2D2\_1)\*(D2D3\_1))\*1000 ;  
D3D2D3\_1 = ((D3D2\_1)\*(D2D3\_1))\*1000 ;  
B1D2D3\_1 = ((B1D2\_1)\*(D2D3\_1))\*1000 ;  
B2D2D3\_1 = ((B2D2\_1)\*(D2D3\_1))\*1000 ;  
A1D2B1\_1 = ((A1D2\_1)\*(D2B1\_1))\*1000 ;  
A2D2B1\_1 = ((A2D2\_1)\*(D2B1\_1))\*1000 ;  
D1D2B1\_1 = ((D1D2\_1)\*(D2B1\_1))\*1000 ;  
D2D2B1\_1 = ((D2D2\_1)\*(D2B1\_1))\*1000 ;  
D3D2B1\_1 = ((D3D2\_1)\*(D2B1\_1))\*1000 ;  
B1D2B1\_1 = ((B1D2\_1)\*(D2B1\_1))\*1000 ;  
B2D2B1\_1 = ((B2D2\_1)\*(D2B1\_1))\*1000 ;  
A1D2B2\_1 = ((A1D2\_1)\*(D2B2\_1))\*1000 ;  
A2D2B2\_1 = ((A2D2\_1)\*(D2B2\_1))\*1000 ;  
D1D2B2\_1 = ((D1D2\_1)\*(D2B2\_1))\*1000 ;  
D2D2B2\_1 = ((D2D2\_1)\*(D2B2\_1))\*1000 ;  
D3D2B2\_1 = ((D3D2\_1)\*(D2B2\_1))\*1000 ;

B1D2B2\_1 = ((B1D2\_1)\*(D2B2\_1))\*1000 ;  
B2D2B2\_1 = ((B2D2\_1)\*(D2B2\_1))\*1000 ;

! indirect effects D2 group 2

NEW(A1D2A1\_2

A2D2A1\_2

D1D2A1\_2

D2D2A1\_2

D3D2A1\_2

B1D2A1\_2

B2D2A1\_2

A1D2A2\_2

A2D2A2\_2

D1D2A2\_2

D2D2A2\_2

D3D2A2\_2

B1D2A2\_2

B2D2A2\_2

A1D2D1\_2

A2D2D1\_2

D1D2D1\_2

D2D2D1\_2

D3D2D1\_2

B1D2D1\_2

B2D2D1\_2

A1D2D2\_2

A2D2D2\_2

D1D2D2\_2

D2D2D2\_2

D3D2D2\_2

B1D2D2\_2

B2D2D2\_2

A1D2D3\_2

A2D2D3\_2

D1D2D3\_2

D2D2D3\_2

D3D2D3\_2

B1D2D3\_2

B2D2D3\_2

A1D2B1\_2

A2D2B1\_2

D1D2B1\_2

D2D2B1\_2

D3D2B1\_2

B1D2B1\_2

B2D2B1\_2

A1D2B2\_2

A2D2B2\_2

D1D2B2\_2

D2D2B2\_2  
D3D2B2\_2  
B1D2B2\_2  
B2D2B2\_2);  
A1D2A1\_2 = ((A1D2\_2)\*(D2A1\_2))\*1000 ;  
A2D2A1\_2 = ((A2D2\_2)\*(D2A1\_2))\*1000 ;  
D1D2A1\_2 = ((D1D2\_2)\*(D2A1\_2))\*1000 ;  
D2D2A1\_2 = ((D2D2\_2)\*(D2A1\_2))\*1000 ;  
D3D2A1\_2 = ((D3D2\_2)\*(D2A1\_2))\*1000 ;  
B1D2A1\_2 = ((B1D2\_2)\*(D2A1\_2))\*1000 ;  
B2D2A1\_2 = ((B2D2\_2)\*(D2A1\_2))\*1000 ;  
A1D2A2\_2 = ((A1D2\_2)\*(D2A2\_2))\*1000 ;  
A2D2A2\_2 = ((A2D2\_2)\*(D2A2\_2))\*1000 ;  
D1D2A2\_2 = ((D1D2\_2)\*(D2A2\_2))\*1000 ;  
D2D2A2\_2 = ((D2D2\_2)\*(D2A2\_2))\*1000 ;  
D3D2A2\_2 = ((D3D2\_2)\*(D2A2\_2))\*1000 ;  
B1D2A2\_2 = ((B1D2\_2)\*(D2A2\_2))\*1000 ;  
B2D2A2\_2 = ((B2D2\_2)\*(D2A2\_2))\*1000 ;  
A1D2D1\_2 = ((A1D2\_2)\*(D2D1\_2))\*1000 ;  
A2D2D1\_2 = ((A2D2\_2)\*(D2D1\_2))\*1000 ;  
D1D2D1\_2 = ((D1D2\_2)\*(D2D1\_2))\*1000 ;  
D2D2D1\_2 = ((D2D2\_2)\*(D2D1\_2))\*1000 ;  
D3D2D1\_2 = ((D3D2\_2)\*(D2D1\_2))\*1000 ;  
B1D2D1\_2 = ((B1D2\_2)\*(D2D1\_2))\*1000 ;  
B2D2D1\_2 = ((B2D2\_2)\*(D2D1\_2))\*1000 ;  
A1D2D2\_2 = ((A1D2\_2)\*(D2D2\_2))\*1000 ;  
A2D2D2\_2 = ((A2D2\_2)\*(D2D2\_2))\*1000 ;  
D1D2D2\_2 = ((D1D2\_2)\*(D2D2\_2))\*1000 ;  
D2D2D2\_2 = ((D2D2\_2)\*(D2D2\_2))\*1000 ;  
D3D2D2\_2 = ((D3D2\_2)\*(D2D2\_2))\*1000 ;  
B1D2D2\_2 = ((B1D2\_2)\*(D2D2\_2))\*1000 ;  
B2D2D2\_2 = ((B2D2\_2)\*(D2D2\_2))\*1000 ;  
A1D2D3\_2 = ((A1D2\_2)\*(D2D3\_2))\*1000 ;  
A2D2D3\_2 = ((A2D2\_2)\*(D2D3\_2))\*1000 ;  
D1D2D3\_2 = ((D1D2\_2)\*(D2D3\_2))\*1000 ;  
D2D2D3\_2 = ((D2D2\_2)\*(D2D3\_2))\*1000 ;  
D3D2D3\_2 = ((D3D2\_2)\*(D2D3\_2))\*1000 ;  
B1D2D3\_2 = ((B1D2\_2)\*(D2D3\_2))\*1000 ;  
B2D2D3\_2 = ((B2D2\_2)\*(D2D3\_2))\*1000 ;  
A1D2B1\_2 = ((A1D2\_2)\*(D2B1\_2))\*1000 ;  
A2D2B1\_2 = ((A2D2\_2)\*(D2B1\_2))\*1000 ;  
D1D2B1\_2 = ((D1D2\_2)\*(D2B1\_2))\*1000 ;  
D2D2B1\_2 = ((D2D2\_2)\*(D2B1\_2))\*1000 ;  
D3D2B1\_2 = ((D3D2\_2)\*(D2B1\_2))\*1000 ;  
B1D2B1\_2 = ((B1D2\_2)\*(D2B1\_2))\*1000 ;  
B2D2B1\_2 = ((B2D2\_2)\*(D2B1\_2))\*1000 ;  
A1D2B2\_2 = ((A1D2\_2)\*(D2B2\_2))\*1000 ;  
A2D2B2\_2 = ((A2D2\_2)\*(D2B2\_2))\*1000 ;  
D1D2B2\_2 = ((D1D2\_2)\*(D2B2\_2))\*1000 ;

D2D2B2\_2 = ((D2D2\_2)\*(D2B2\_2))\*1000 ;  
D3D2B2\_2 = ((D3D2\_2)\*(D2B2\_2))\*1000 ;  
B1D2B2\_2 = ((B1D2\_2)\*(D2B2\_2))\*1000 ;  
B2D2B2\_2 = ((B2D2\_2)\*(D2B2\_2))\*1000 ;

! indirect effects D3 group 0

NEW(A1D3A1\_0

A2D3A1\_0

D1D3A1\_0

D2D3A1\_0

D3D3A1\_0

B1D3A1\_0

B2D3A1\_0

A1D3A2\_0

A2D3A2\_0

D1D3A2\_0

D2D3A2\_0

D3D3A2\_0

B1D3A2\_0

B2D3A2\_0

A1D3D1\_0

A2D3D1\_0

D1D3D1\_0

D2D3D1\_0

D3D3D1\_0

B1D3D1\_0

B2D3D1\_0

A1D3D2\_0

A2D3D2\_0

D1D3D2\_0

D2D3D2\_0

D3D3D2\_0

B1D3D2\_0

B2D3D2\_0

A1D3D3\_0

A2D3D3\_0

D1D3D3\_0

D2D3D3\_0

D3D3D3\_0

B1D3D3\_0

B2D3D3\_0

A1D3B1\_0

A2D3B1\_0

D1D3B1\_0

D2D3B1\_0

D3D3B1\_0

B1D3B1\_0

B2D3B1\_0

A1D3B2\_0

A2D3B2\_0  
D1D3B2\_0  
D2D3B2\_0  
D3D3B2\_0  
B1D3B2\_0  
B2D3B2\_0);  
A1D3A1\_0 = ((A1D3\_0)\*(D3A1\_0))\*1000 ;  
A2D3A1\_0 = ((A2D3\_0)\*(D3A1\_0))\*1000 ;  
D1D3A1\_0 = ((D1D3\_0)\*(D3A1\_0))\*1000 ;  
D2D3A1\_0 = ((D2D3\_0)\*(D3A1\_0))\*1000 ;  
D3D3A1\_0 = ((D3D3\_0)\*(D3A1\_0))\*1000 ;  
B1D3A1\_0 = ((B1D3\_0)\*(D3A1\_0))\*1000 ;  
B2D3A1\_0 = ((B2D3\_0)\*(D3A1\_0))\*1000 ;  
A1D3A2\_0 = ((A1D3\_0)\*(D3A2\_0))\*1000 ;  
A2D3A2\_0 = ((A2D3\_0)\*(D3A2\_0))\*1000 ;  
D1D3A2\_0 = ((D1D3\_0)\*(D3A2\_0))\*1000 ;  
D2D3A2\_0 = ((D2D3\_0)\*(D3A2\_0))\*1000 ;  
D3D3A2\_0 = ((D3D3\_0)\*(D3A2\_0))\*1000 ;  
B1D3A2\_0 = ((B1D3\_0)\*(D3A2\_0))\*1000 ;  
B2D3A2\_0 = ((B2D3\_0)\*(D3A2\_0))\*1000 ;  
A1D3D1\_0 = ((A1D3\_0)\*(D3D1\_0))\*1000 ;  
A2D3D1\_0 = ((A2D3\_0)\*(D3D1\_0))\*1000 ;  
D1D3D1\_0 = ((D1D3\_0)\*(D3D1\_0))\*1000 ;  
D2D3D1\_0 = ((D2D3\_0)\*(D3D1\_0))\*1000 ;  
D3D3D1\_0 = ((D3D3\_0)\*(D3D1\_0))\*1000 ;  
B1D3D1\_0 = ((B1D3\_0)\*(D3D1\_0))\*1000 ;  
B2D3D1\_0 = ((B2D3\_0)\*(D3D1\_0))\*1000 ;  
A1D3D2\_0 = ((A1D3\_0)\*(D3D2\_0))\*1000 ;  
A2D3D2\_0 = ((A2D3\_0)\*(D3D2\_0))\*1000 ;  
D1D3D2\_0 = ((D1D3\_0)\*(D3D2\_0))\*1000 ;  
D2D3D2\_0 = ((D2D3\_0)\*(D3D2\_0))\*1000 ;  
D3D3D2\_0 = ((D3D3\_0)\*(D3D2\_0))\*1000 ;  
B1D3D2\_0 = ((B1D3\_0)\*(D3D2\_0))\*1000 ;  
B2D3D2\_0 = ((B2D3\_0)\*(D3D2\_0))\*1000 ;  
A1D3D3\_0 = ((A1D3\_0)\*(D3D3\_0))\*1000 ;  
A2D3D3\_0 = ((A2D3\_0)\*(D3D3\_0))\*1000 ;  
D1D3D3\_0 = ((D1D3\_0)\*(D3D3\_0))\*1000 ;  
D2D3D3\_0 = ((D2D3\_0)\*(D3D3\_0))\*1000 ;  
D3D3D3\_0 = ((D3D3\_0)\*(D3D3\_0))\*1000 ;  
B1D3D3\_0 = ((B1D3\_0)\*(D3D3\_0))\*1000 ;  
B2D3D3\_0 = ((B2D3\_0)\*(D3D3\_0))\*1000 ;  
A1D3B1\_0 = ((A1D3\_0)\*(D3B1\_0))\*1000 ;  
A2D3B1\_0 = ((A2D3\_0)\*(D3B1\_0))\*1000 ;  
D1D3B1\_0 = ((D1D3\_0)\*(D3B1\_0))\*1000 ;  
D2D3B1\_0 = ((D2D3\_0)\*(D3B1\_0))\*1000 ;  
D3D3B1\_0 = ((D3D3\_0)\*(D3B1\_0))\*1000 ;  
B1D3B1\_0 = ((B1D3\_0)\*(D3B1\_0))\*1000 ;  
B2D3B1\_0 = ((B2D3\_0)\*(D3B1\_0))\*1000 ;  
A1D3B2\_0 = ((A1D3\_0)\*(D3B2\_0))\*1000 ;

A2D3B2\_0 = ((A2D3\_0)\*(D3B2\_0))\*1000 ;  
D1D3B2\_0 = ((D1D3\_0)\*(D3B2\_0))\*1000 ;  
D2D3B2\_0 = ((D2D3\_0)\*(D3B2\_0))\*1000 ;  
D3D3B2\_0 = ((D3D3\_0)\*(D3B2\_0))\*1000 ;  
B1D3B2\_0 = ((B1D3\_0)\*(D3B2\_0))\*1000 ;  
B2D3B2\_0 = ((B2D3\_0)\*(D3B2\_0))\*1000 ;

! indirect effects D3 group 1

NEW(A1D3A1\_1

A2D3A1\_1

D1D3A1\_1

D2D3A1\_1

D3D3A1\_1

B1D3A1\_1

B2D3A1\_1

A1D3A2\_1

A2D3A2\_1

D1D3A2\_1

D2D3A2\_1

D3D3A2\_1

B1D3A2\_1

B2D3A2\_1

A1D3D1\_1

A2D3D1\_1

D1D3D1\_1

D2D3D1\_1

D3D3D1\_1

B1D3D1\_1

B2D3D1\_1

A1D3D2\_1

A2D3D2\_1

D1D3D2\_1

D2D3D2\_1

D3D3D2\_1

B1D3D2\_1

B2D3D2\_1

A1D3D3\_1

A2D3D3\_1

D1D3D3\_1

D2D3D3\_1

D3D3D3\_1

B1D3D3\_1

B2D3D3\_1

A1D3B1\_1

A2D3B1\_1

D1D3B1\_1

D2D3B1\_1

D3D3B1\_1

B1D3B1\_1

B2D3B1\_1  
A1D3B2\_1  
A2D3B2\_1  
D1D3B2\_1  
D2D3B2\_1  
D3D3B2\_1  
B1D3B2\_1  
B2D3B2\_1);  
A1D3A1\_1 = ((A1D3\_1)\*(D3A1\_1))\*1000 ;  
A2D3A1\_1 = ((A2D3\_1)\*(D3A1\_1))\*1000 ;  
D1D3A1\_1 = ((D1D3\_1)\*(D3A1\_1))\*1000 ;  
D2D3A1\_1 = ((D2D3\_1)\*(D3A1\_1))\*1000 ;  
D3D3A1\_1 = ((D3D3\_1)\*(D3A1\_1))\*1000 ;  
B1D3A1\_1 = ((B1D3\_1)\*(D3A1\_1))\*1000 ;  
B2D3A1\_1 = ((B2D3\_1)\*(D3A1\_1))\*1000 ;  
A1D3A2\_1 = ((A1D3\_1)\*(D3A2\_1))\*1000 ;  
A2D3A2\_1 = ((A2D3\_1)\*(D3A2\_1))\*1000 ;  
D1D3A2\_1 = ((D1D3\_1)\*(D3A2\_1))\*1000 ;  
D2D3A2\_1 = ((D2D3\_1)\*(D3A2\_1))\*1000 ;  
D3D3A2\_1 = ((D3D3\_1)\*(D3A2\_1))\*1000 ;  
B1D3A2\_1 = ((B1D3\_1)\*(D3A2\_1))\*1000 ;  
B2D3A2\_1 = ((B2D3\_1)\*(D3A2\_1))\*1000 ;  
A1D3D1\_1 = ((A1D3\_1)\*(D3D1\_1))\*1000 ;  
A2D3D1\_1 = ((A2D3\_1)\*(D3D1\_1))\*1000 ;  
D1D3D1\_1 = ((D1D3\_1)\*(D3D1\_1))\*1000 ;  
D2D3D1\_1 = ((D2D3\_1)\*(D3D1\_1))\*1000 ;  
D3D3D1\_1 = ((D3D3\_1)\*(D3D1\_1))\*1000 ;  
B1D3D1\_1 = ((B1D3\_1)\*(D3D1\_1))\*1000 ;  
B2D3D1\_1 = ((B2D3\_1)\*(D3D1\_1))\*1000 ;  
A1D3D2\_1 = ((A1D3\_1)\*(D3D2\_1))\*1000 ;  
A2D3D2\_1 = ((A2D3\_1)\*(D3D2\_1))\*1000 ;  
D1D3D2\_1 = ((D1D3\_1)\*(D3D2\_1))\*1000 ;  
D2D3D2\_1 = ((D2D3\_1)\*(D3D2\_1))\*1000 ;  
D3D3D2\_1 = ((D3D3\_1)\*(D3D2\_1))\*1000 ;  
B1D3D2\_1 = ((B1D3\_1)\*(D3D2\_1))\*1000 ;  
B2D3D2\_1 = ((B2D3\_1)\*(D3D2\_1))\*1000 ;  
A1D3D3\_1 = ((A1D3\_1)\*(D3D3\_1))\*1000 ;  
A2D3D3\_1 = ((A2D3\_1)\*(D3D3\_1))\*1000 ;  
D1D3D3\_1 = ((D1D3\_1)\*(D3D3\_1))\*1000 ;  
D2D3D3\_1 = ((D2D3\_1)\*(D3D3\_1))\*1000 ;  
D3D3D3\_1 = ((D3D3\_1)\*(D3D3\_1))\*1000 ;  
B1D3D3\_1 = ((B1D3\_1)\*(D3D3\_1))\*1000 ;  
B2D3D3\_1 = ((B2D3\_1)\*(D3D3\_1))\*1000 ;  
A1D3B1\_1 = ((A1D3\_1)\*(D3B1\_1))\*1000 ;  
A2D3B1\_1 = ((A2D3\_1)\*(D3B1\_1))\*1000 ;  
D1D3B1\_1 = ((D1D3\_1)\*(D3B1\_1))\*1000 ;  
D2D3B1\_1 = ((D2D3\_1)\*(D3B1\_1))\*1000 ;  
D3D3B1\_1 = ((D3D3\_1)\*(D3B1\_1))\*1000 ;  
B1D3B1\_1 = ((B1D3\_1)\*(D3B1\_1))\*1000 ;



B2D3B1\_1 = ((B2D3\_1)\*(D3B1\_1))\*1000 ;  
A1D3B2\_1 = ((A1D3\_1)\*(D3B2\_1))\*1000 ;  
A2D3B2\_1 = ((A2D3\_1)\*(D3B2\_1))\*1000 ;  
D1D3B2\_1 = ((D1D3\_1)\*(D3B2\_1))\*1000 ;  
D2D3B2\_1 = ((D2D3\_1)\*(D3B2\_1))\*1000 ;  
D3D3B2\_1 = ((D3D3\_1)\*(D3B2\_1))\*1000 ;  
B1D3B2\_1 = ((B1D3\_1)\*(D3B2\_1))\*1000 ;  
B2D3B2\_1 = ((B2D3\_1)\*(D3B2\_1))\*1000 ;

! indirect effects D3 group 2

NEW(A1D3A1\_2

A2D3A1\_2

D1D3A1\_2

D2D3A1\_2

D3D3A1\_2

B1D3A1\_2

B2D3A1\_2

A1D3A2\_2

A2D3A2\_2

D1D3A2\_2

D2D3A2\_2

D3D3A2\_2

B1D3A2\_2

B2D3A2\_2

A1D3D1\_2

A2D3D1\_2

D1D3D1\_2

D2D3D1\_2

D3D3D1\_2

B1D3D1\_2

B2D3D1\_2

A1D3D2\_2

A2D3D2\_2

D1D3D2\_2

D2D3D2\_2

D3D3D2\_2

B1D3D2\_2

B2D3D2\_2

A1D3D3\_2

A2D3D3\_2

D1D3D3\_2

D2D3D3\_2

D3D3D3\_2

B1D3D3\_2

B2D3D3\_2

A1D3B1\_2

A2D3B1\_2

D1D3B1\_2

D2D3B1\_2

D3D3B1\_2  
B1D3B1\_2  
B2D3B1\_2  
A1D3B2\_2  
A2D3B2\_2  
D1D3B2\_2  
D2D3B2\_2  
D3D3B2\_2  
B1D3B2\_2  
B2D3B2\_2);  
A1D3A1\_2 = ((A1D3\_2)\*(D3A1\_2))\*1000 ;  
A2D3A1\_2 = ((A2D3\_2)\*(D3A1\_2))\*1000 ;  
D1D3A1\_2 = ((D1D3\_2)\*(D3A1\_2))\*1000 ;  
D2D3A1\_2 = ((D2D3\_2)\*(D3A1\_2))\*1000 ;  
D3D3A1\_2 = ((D3D3\_2)\*(D3A1\_2))\*1000 ;  
B1D3A1\_2 = ((B1D3\_2)\*(D3A1\_2))\*1000 ;  
B2D3A1\_2 = ((B2D3\_2)\*(D3A1\_2))\*1000 ;  
A1D3A2\_2 = ((A1D3\_2)\*(D3A2\_2))\*1000 ;  
A2D3A2\_2 = ((A2D3\_2)\*(D3A2\_2))\*1000 ;  
D1D3A2\_2 = ((D1D3\_2)\*(D3A2\_2))\*1000 ;  
D2D3A2\_2 = ((D2D3\_2)\*(D3A2\_2))\*1000 ;  
D3D3A2\_2 = ((D3D3\_2)\*(D3A2\_2))\*1000 ;  
B1D3A2\_2 = ((B1D3\_2)\*(D3A2\_2))\*1000 ;  
B2D3A2\_2 = ((B2D3\_2)\*(D3A2\_2))\*1000 ;  
A1D3D1\_2 = ((A1D3\_2)\*(D3D1\_2))\*1000 ;  
A2D3D1\_2 = ((A2D3\_2)\*(D3D1\_2))\*1000 ;  
D1D3D1\_2 = ((D1D3\_2)\*(D3D1\_2))\*1000 ;  
D2D3D1\_2 = ((D2D3\_2)\*(D3D1\_2))\*1000 ;  
D3D3D1\_2 = ((D3D3\_2)\*(D3D1\_2))\*1000 ;  
B1D3D1\_2 = ((B1D3\_2)\*(D3D1\_2))\*1000 ;  
B2D3D1\_2 = ((B2D3\_2)\*(D3D1\_2))\*1000 ;  
A1D3D2\_2 = ((A1D3\_2)\*(D3D2\_2))\*1000 ;  
A2D3D2\_2 = ((A2D3\_2)\*(D3D2\_2))\*1000 ;  
D1D3D2\_2 = ((D1D3\_2)\*(D3D2\_2))\*1000 ;  
D2D3D2\_2 = ((D2D3\_2)\*(D3D2\_2))\*1000 ;  
D3D3D2\_2 = ((D3D3\_2)\*(D3D2\_2))\*1000 ;  
B1D3D2\_2 = ((B1D3\_2)\*(D3D2\_2))\*1000 ;  
B2D3D2\_2 = ((B2D3\_2)\*(D3D2\_2))\*1000 ;  
A1D3D3\_2 = ((A1D3\_2)\*(D3D3\_2))\*1000 ;  
A2D3D3\_2 = ((A2D3\_2)\*(D3D3\_2))\*1000 ;  
D1D3D3\_2 = ((D1D3\_2)\*(D3D3\_2))\*1000 ;  
D2D3D3\_2 = ((D2D3\_2)\*(D3D3\_2))\*1000 ;  
D3D3D3\_2 = ((D3D3\_2)\*(D3D3\_2))\*1000 ;  
B1D3D3\_2 = ((B1D3\_2)\*(D3D3\_2))\*1000 ;  
B2D3D3\_2 = ((B2D3\_2)\*(D3D3\_2))\*1000 ;  
A1D3B1\_2 = ((A1D3\_2)\*(D3B1\_2))\*1000 ;  
A2D3B1\_2 = ((A2D3\_2)\*(D3B1\_2))\*1000 ;  
D1D3B1\_2 = ((D1D3\_2)\*(D3B1\_2))\*1000 ;  
D2D3B1\_2 = ((D2D3\_2)\*(D3B1\_2))\*1000 ;

D3D3B1\_2 = ((D3D3\_2)\*(D3B1\_2))\*1000 ;  
B1D3B1\_2 = ((B1D3\_2)\*(D3B1\_2))\*1000 ;  
B2D3B1\_2 = ((B2D3\_2)\*(D3B1\_2))\*1000 ;  
A1D3B2\_2 = ((A1D3\_2)\*(D3B2\_2))\*1000 ;  
A2D3B2\_2 = ((A2D3\_2)\*(D3B2\_2))\*1000 ;  
D1D3B2\_2 = ((D1D3\_2)\*(D3B2\_2))\*1000 ;  
D2D3B2\_2 = ((D2D3\_2)\*(D3B2\_2))\*1000 ;  
D3D3B2\_2 = ((D3D3\_2)\*(D3B2\_2))\*1000 ;  
B1D3B2\_2 = ((B1D3\_2)\*(D3B2\_2))\*1000 ;  
B2D3B2\_2 = ((B2D3\_2)\*(D3B2\_2))\*1000 ;

! indirect effects B1 group 0

NEW(A1B1A1\_0

A2B1A1\_0

D1B1A1\_0

D2B1A1\_0

D3B1A1\_0

B1B1A1\_0

B2B1A1\_0

A1B1A2\_0

A2B1A2\_0

D1B1A2\_0

D2B1A2\_0

D3B1A2\_0

B1B1A2\_0

B2B1A2\_0

A1B1D1\_0

A2B1D1\_0

D1B1D1\_0

D2B1D1\_0

D3B1D1\_0

B1B1D1\_0

B2B1D1\_0

A1B1D2\_0

A2B1D2\_0

D1B1D2\_0

D2B1D2\_0

D3B1D2\_0

B1B1D2\_0

B2B1D2\_0

A1B1D3\_0

A2B1D3\_0

D1B1D3\_0

D2B1D3\_0

D3B1D3\_0

B1B1D3\_0

B2B1D3\_0

A1B1B1\_0

A2B1B1\_0

D1B1B1\_0  
D2B1B1\_0  
D3B1B1\_0  
B1B1B1\_0  
B2B1B1\_0  
A1B1B2\_0  
A2B1B2\_0  
D1B1B2\_0  
D2B1B2\_0  
D3B1B2\_0  
B1B1B2\_0  
B2B1B2\_0);  
A1B1A1\_0 = ((A1B1\_0)\*(B1A1\_0))\*1000 ;  
A2B1A1\_0 = ((A2B1\_0)\*(B1A1\_0))\*1000 ;  
D1B1A1\_0 = ((D1B1\_0)\*(B1A1\_0))\*1000 ;  
D2B1A1\_0 = ((D2B1\_0)\*(B1A1\_0))\*1000 ;  
D3B1A1\_0 = ((D3B1\_0)\*(B1A1\_0))\*1000 ;  
B1B1A1\_0 = ((B1B1\_0)\*(B1A1\_0))\*1000 ;  
B2B1A1\_0 = ((B2B1\_0)\*(B1A1\_0))\*1000 ;  
A1B1A2\_0 = ((A1B1\_0)\*(B1A2\_0))\*1000 ;  
A2B1A2\_0 = ((A2B1\_0)\*(B1A2\_0))\*1000 ;  
D1B1A2\_0 = ((D1B1\_0)\*(B1A2\_0))\*1000 ;  
D2B1A2\_0 = ((D2B1\_0)\*(B1A2\_0))\*1000 ;  
D3B1A2\_0 = ((D3B1\_0)\*(B1A2\_0))\*1000 ;  
B1B1A2\_0 = ((B1B1\_0)\*(B1A2\_0))\*1000 ;  
B2B1A2\_0 = ((B2B1\_0)\*(B1A2\_0))\*1000 ;  
A1B1D1\_0 = ((A1B1\_0)\*(B1D1\_0))\*1000 ;  
A2B1D1\_0 = ((A2B1\_0)\*(B1D1\_0))\*1000 ;  
D1B1D1\_0 = ((D1B1\_0)\*(B1D1\_0))\*1000 ;  
D2B1D1\_0 = ((D2B1\_0)\*(B1D1\_0))\*1000 ;  
D3B1D1\_0 = ((D3B1\_0)\*(B1D1\_0))\*1000 ;  
B1B1D1\_0 = ((B1B1\_0)\*(B1D1\_0))\*1000 ;  
B2B1D1\_0 = ((B2B1\_0)\*(B1D1\_0))\*1000 ;  
A1B1D2\_0 = ((A1B1\_0)\*(B1D2\_0))\*1000 ;  
A2B1D2\_0 = ((A2B1\_0)\*(B1D2\_0))\*1000 ;  
D1B1D2\_0 = ((D1B1\_0)\*(B1D2\_0))\*1000 ;  
D2B1D2\_0 = ((D2B1\_0)\*(B1D2\_0))\*1000 ;  
D3B1D2\_0 = ((D3B1\_0)\*(B1D2\_0))\*1000 ;  
B1B1D2\_0 = ((B1B1\_0)\*(B1D2\_0))\*1000 ;  
B2B1D2\_0 = ((B2B1\_0)\*(B1D2\_0))\*1000 ;  
A1B1D3\_0 = ((A1B1\_0)\*(B1D3\_0))\*1000 ;  
A2B1D3\_0 = ((A2B1\_0)\*(B1D3\_0))\*1000 ;  
D1B1D3\_0 = ((D1B1\_0)\*(B1D3\_0))\*1000 ;  
D2B1D3\_0 = ((D2B1\_0)\*(B1D3\_0))\*1000 ;  
D3B1D3\_0 = ((D3B1\_0)\*(B1D3\_0))\*1000 ;  
B1B1D3\_0 = ((B1B1\_0)\*(B1D3\_0))\*1000 ;  
B2B1D3\_0 = ((B2B1\_0)\*(B1D3\_0))\*1000 ;  
A1B1B1\_0 = ((A1B1\_0)\*(B1B1\_0))\*1000 ;  
A2B1B1\_0 = ((A2B1\_0)\*(B1B1\_0))\*1000 ;

D1B1B1\_0 = ((D1B1\_0)\*(B1B1\_0))\*1000 ;  
D2B1B1\_0 = ((D2B1\_0)\*(B1B1\_0))\*1000 ;  
D3B1B1\_0 = ((D3B1\_0)\*(B1B1\_0))\*1000 ;  
B1B1B1\_0 = ((B1B1\_0)\*(B1B1\_0))\*1000 ;  
B2B1B1\_0 = ((B2B1\_0)\*(B1B1\_0))\*1000 ;  
A1B1B2\_0 = ((A1B1\_0)\*(B1B2\_0))\*1000 ;  
A2B1B2\_0 = ((A2B1\_0)\*(B1B2\_0))\*1000 ;  
D1B1B2\_0 = ((D1B1\_0)\*(B1B2\_0))\*1000 ;  
D2B1B2\_0 = ((D2B1\_0)\*(B1B2\_0))\*1000 ;  
D3B1B2\_0 = ((D3B1\_0)\*(B1B2\_0))\*1000 ;  
B1B1B2\_0 = ((B1B1\_0)\*(B1B2\_0))\*1000 ;  
B2B1B2\_0 = ((B2B1\_0)\*(B1B2\_0))\*1000 ;

! indirect effects B1 group 1

NEW(A1B1A1\_1

A2B1A1\_1

D1B1A1\_1

D2B1A1\_1

D3B1A1\_1

B1B1A1\_1

B2B1A1\_1

A1B1A2\_1

A2B1A2\_1

D1B1A2\_1

D2B1A2\_1

D3B1A2\_1

B1B1A2\_1

B2B1A2\_1

A1B1D1\_1

A2B1D1\_1

D1B1D1\_1

D2B1D1\_1

D3B1D1\_1

B1B1D1\_1

B2B1D1\_1

A1B1D2\_1

A2B1D2\_1

D1B1D2\_1

D2B1D2\_1

D3B1D2\_1

B1B1D2\_1

B2B1D2\_1

A1B1D3\_1

A2B1D3\_1

D1B1D3\_1

D2B1D3\_1

D3B1D3\_1

B1B1D3\_1

B2B1D3\_1

A1B1B1\_1  
A2B1B1\_1  
D1B1B1\_1  
D2B1B1\_1  
D3B1B1\_1  
B1B1B1\_1  
B2B1B1\_1  
A1B1B2\_1  
A2B1B2\_1  
D1B1B2\_1  
D2B1B2\_1  
D3B1B2\_1  
B1B1B2\_1  
B2B1B2\_1);  
A1B1A1\_1 = ((A1B1\_1)\*(B1A1\_1))\*1000 ;  
A2B1A1\_1 = ((A2B1\_1)\*(B1A1\_1))\*1000 ;  
D1B1A1\_1 = ((D1B1\_1)\*(B1A1\_1))\*1000 ;  
D2B1A1\_1 = ((D2B1\_1)\*(B1A1\_1))\*1000 ;  
D3B1A1\_1 = ((D3B1\_1)\*(B1A1\_1))\*1000 ;  
B1B1A1\_1 = ((B1B1\_1)\*(B1A1\_1))\*1000 ;  
B2B1A1\_1 = ((B2B1\_1)\*(B1A1\_1))\*1000 ;  
A1B1A2\_1 = ((A1B1\_1)\*(B1A2\_1))\*1000 ;  
A2B1A2\_1 = ((A2B1\_1)\*(B1A2\_1))\*1000 ;  
D1B1A2\_1 = ((D1B1\_1)\*(B1A2\_1))\*1000 ;  
D2B1A2\_1 = ((D2B1\_1)\*(B1A2\_1))\*1000 ;  
D3B1A2\_1 = ((D3B1\_1)\*(B1A2\_1))\*1000 ;  
B1B1A2\_1 = ((B1B1\_1)\*(B1A2\_1))\*1000 ;  
B2B1A2\_1 = ((B2B1\_1)\*(B1A2\_1))\*1000 ;  
A1B1D1\_1 = ((A1B1\_1)\*(B1D1\_1))\*1000 ;  
A2B1D1\_1 = ((A2B1\_1)\*(B1D1\_1))\*1000 ;  
D1B1D1\_1 = ((D1B1\_1)\*(B1D1\_1))\*1000 ;  
D2B1D1\_1 = ((D2B1\_1)\*(B1D1\_1))\*1000 ;  
D3B1D1\_1 = ((D3B1\_1)\*(B1D1\_1))\*1000 ;  
B1B1D1\_1 = ((B1B1\_1)\*(B1D1\_1))\*1000 ;  
B2B1D1\_1 = ((B2B1\_1)\*(B1D1\_1))\*1000 ;  
A1B1D2\_1 = ((A1B1\_1)\*(B1D2\_1))\*1000 ;  
A2B1D2\_1 = ((A2B1\_1)\*(B1D2\_1))\*1000 ;  
D1B1D2\_1 = ((D1B1\_1)\*(B1D2\_1))\*1000 ;  
D2B1D2\_1 = ((D2B1\_1)\*(B1D2\_1))\*1000 ;  
D3B1D2\_1 = ((D3B1\_1)\*(B1D2\_1))\*1000 ;  
B1B1D2\_1 = ((B1B1\_1)\*(B1D2\_1))\*1000 ;  
B2B1D2\_1 = ((B2B1\_1)\*(B1D2\_1))\*1000 ;  
A1B1D3\_1 = ((A1B1\_1)\*(B1D3\_1))\*1000 ;  
A2B1D3\_1 = ((A2B1\_1)\*(B1D3\_1))\*1000 ;  
D1B1D3\_1 = ((D1B1\_1)\*(B1D3\_1))\*1000 ;  
D2B1D3\_1 = ((D2B1\_1)\*(B1D3\_1))\*1000 ;  
D3B1D3\_1 = ((D3B1\_1)\*(B1D3\_1))\*1000 ;  
B1B1D3\_1 = ((B1B1\_1)\*(B1D3\_1))\*1000 ;  
B2B1D3\_1 = ((B2B1\_1)\*(B1D3\_1))\*1000 ;

A1B1B1\_1 = ((A1B1\_1)\*(B1B1\_1))\*1000 ;  
A2B1B1\_1 = ((A2B1\_1)\*(B1B1\_1))\*1000 ;  
D1B1B1\_1 = ((D1B1\_1)\*(B1B1\_1))\*1000 ;  
D2B1B1\_1 = ((D2B1\_1)\*(B1B1\_1))\*1000 ;  
D3B1B1\_1 = ((D3B1\_1)\*(B1B1\_1))\*1000 ;  
B1B1B1\_1 = ((B1B1\_1)\*(B1B1\_1))\*1000 ;  
B2B1B1\_1 = ((B2B1\_1)\*(B1B1\_1))\*1000 ;  
A1B1B2\_1 = ((A1B1\_1)\*(B1B2\_1))\*1000 ;  
A2B1B2\_1 = ((A2B1\_1)\*(B1B2\_1))\*1000 ;  
D1B1B2\_1 = ((D1B1\_1)\*(B1B2\_1))\*1000 ;  
D2B1B2\_1 = ((D2B1\_1)\*(B1B2\_1))\*1000 ;  
D3B1B2\_1 = ((D3B1\_1)\*(B1B2\_1))\*1000 ;  
B1B1B2\_1 = ((B1B1\_1)\*(B1B2\_1))\*1000 ;  
B2B1B2\_1 = ((B2B1\_1)\*(B1B2\_1))\*1000 ;

! indirect effects B1 group 2

NEW(A1B1A1\_2

A2B1A1\_2

D1B1A1\_2

D2B1A1\_2

D3B1A1\_2

B1B1A1\_2

B2B1A1\_2

A1B1A2\_2

A2B1A2\_2

D1B1A2\_2

D2B1A2\_2

D3B1A2\_2

B1B1A2\_2

B2B1A2\_2

A1B1D1\_2

A2B1D1\_2

D1B1D1\_2

D2B1D1\_2

D3B1D1\_2

B1B1D1\_2

B2B1D1\_2

A1B1D2\_2

A2B1D2\_2

D1B1D2\_2

D2B1D2\_2

D3B1D2\_2

B1B1D2\_2

B2B1D2\_2

A1B1D3\_2

A2B1D3\_2

D1B1D3\_2

D2B1D3\_2

D3B1D3\_2

B1B1D3\_2  
B2B1D3\_2  
A1B1B1\_2  
A2B1B1\_2  
D1B1B1\_2  
D2B1B1\_2  
D3B1B1\_2  
B1B1B1\_2  
B2B1B1\_2  
A1B1B2\_2  
A2B1B2\_2  
D1B1B2\_2  
D2B1B2\_2  
D3B1B2\_2  
B1B1B2\_2  
B2B1B2\_2);  
A1B1A1\_2 = ((A1B1\_2)\*(B1A1\_2))\*1000 ;  
A2B1A1\_2 = ((A2B1\_2)\*(B1A1\_2))\*1000 ;  
D1B1A1\_2 = ((D1B1\_2)\*(B1A1\_2))\*1000 ;  
D2B1A1\_2 = ((D2B1\_2)\*(B1A1\_2))\*1000 ;  
D3B1A1\_2 = ((D3B1\_2)\*(B1A1\_2))\*1000 ;  
B1B1A1\_2 = ((B1B1\_2)\*(B1A1\_2))\*1000 ;  
B2B1A1\_2 = ((B2B1\_2)\*(B1A1\_2))\*1000 ;  
A1B1A2\_2 = ((A1B1\_2)\*(B1A2\_2))\*1000 ;  
A2B1A2\_2 = ((A2B1\_2)\*(B1A2\_2))\*1000 ;  
D1B1A2\_2 = ((D1B1\_2)\*(B1A2\_2))\*1000 ;  
D2B1A2\_2 = ((D2B1\_2)\*(B1A2\_2))\*1000 ;  
D3B1A2\_2 = ((D3B1\_2)\*(B1A2\_2))\*1000 ;  
B1B1A2\_2 = ((B1B1\_2)\*(B1A2\_2))\*1000 ;  
B2B1A2\_2 = ((B2B1\_2)\*(B1A2\_2))\*1000 ;  
A1B1D1\_2 = ((A1B1\_2)\*(B1D1\_2))\*1000 ;  
A2B1D1\_2 = ((A2B1\_2)\*(B1D1\_2))\*1000 ;  
D1B1D1\_2 = ((D1B1\_2)\*(B1D1\_2))\*1000 ;  
D2B1D1\_2 = ((D2B1\_2)\*(B1D1\_2))\*1000 ;  
D3B1D1\_2 = ((D3B1\_2)\*(B1D1\_2))\*1000 ;  
B1B1D1\_2 = ((B1B1\_2)\*(B1D1\_2))\*1000 ;  
B2B1D1\_2 = ((B2B1\_2)\*(B1D1\_2))\*1000 ;  
A1B1D2\_2 = ((A1B1\_2)\*(B1D2\_2))\*1000 ;  
A2B1D2\_2 = ((A2B1\_2)\*(B1D2\_2))\*1000 ;  
D1B1D2\_2 = ((D1B1\_2)\*(B1D2\_2))\*1000 ;  
D2B1D2\_2 = ((D2B1\_2)\*(B1D2\_2))\*1000 ;  
D3B1D2\_2 = ((D3B1\_2)\*(B1D2\_2))\*1000 ;  
B1B1D2\_2 = ((B1B1\_2)\*(B1D2\_2))\*1000 ;  
B2B1D2\_2 = ((B2B1\_2)\*(B1D2\_2))\*1000 ;  
A1B1D3\_2 = ((A1B1\_2)\*(B1D3\_2))\*1000 ;  
A2B1D3\_2 = ((A2B1\_2)\*(B1D3\_2))\*1000 ;  
D1B1D3\_2 = ((D1B1\_2)\*(B1D3\_2))\*1000 ;  
D2B1D3\_2 = ((D2B1\_2)\*(B1D3\_2))\*1000 ;  
D3B1D3\_2 = ((D3B1\_2)\*(B1D3\_2))\*1000 ;



B1B1D3\_2 = ((B1B1\_2)\*(B1D3\_2))\*1000 ;  
B2B1D3\_2 = ((B2B1\_2)\*(B1D3\_2))\*1000 ;  
A1B1B1\_2 = ((A1B1\_2)\*(B1B1\_2))\*1000 ;  
A2B1B1\_2 = ((A2B1\_2)\*(B1B1\_2))\*1000 ;  
D1B1B1\_2 = ((D1B1\_2)\*(B1B1\_2))\*1000 ;  
D2B1B1\_2 = ((D2B1\_2)\*(B1B1\_2))\*1000 ;  
D3B1B1\_2 = ((D3B1\_2)\*(B1B1\_2))\*1000 ;  
B1B1B1\_2 = ((B1B1\_2)\*(B1B1\_2))\*1000 ;  
B2B1B1\_2 = ((B2B1\_2)\*(B1B1\_2))\*1000 ;  
A1B1B2\_2 = ((A1B1\_2)\*(B1B2\_2))\*1000 ;  
A2B1B2\_2 = ((A2B1\_2)\*(B1B2\_2))\*1000 ;  
D1B1B2\_2 = ((D1B1\_2)\*(B1B2\_2))\*1000 ;  
D2B1B2\_2 = ((D2B1\_2)\*(B1B2\_2))\*1000 ;  
D3B1B2\_2 = ((D3B1\_2)\*(B1B2\_2))\*1000 ;  
B1B1B2\_2 = ((B1B1\_2)\*(B1B2\_2))\*1000 ;  
B2B1B2\_2 = ((B2B1\_2)\*(B1B2\_2))\*1000 ;

! indirect effects B2 group 0

NEW(A1B2A1\_0

A2B2A1\_0

D1B2A1\_0

D2B2A1\_0

D3B2A1\_0

B1B2A1\_0

B2B2A1\_0

A1B2A2\_0

A2B2A2\_0

D1B2A2\_0

D2B2A2\_0

D3B2A2\_0

B1B2A2\_0

B2B2A2\_0

A1B2D1\_0

A2B2D1\_0

D1B2D1\_0

D2B2D1\_0

D3B2D1\_0

B1B2D1\_0

B2B2D1\_0

A1B2D2\_0

A2B2D2\_0

D1B2D2\_0

D2B2D2\_0

D3B2D2\_0

B1B2D2\_0

B2B2D2\_0

A1B2D3\_0

A2B2D3\_0

D1B2D3\_0

D2B2D3\_0  
D3B2D3\_0  
B1B2D3\_0  
B2B2D3\_0  
A1B2B1\_0  
A2B2B1\_0  
D1B2B1\_0  
D2B2B1\_0  
D3B2B1\_0  
B1B2B1\_0  
B2B2B1\_0  
A1B2B2\_0  
A2B2B2\_0  
D1B2B2\_0  
D2B2B2\_0  
D3B2B2\_0  
B1B2B2\_0  
B2B2B2\_0);  
A1B2A1\_0 = ((A1B2\_0)\*(B2A1\_0))\*1000 ;  
A2B2A1\_0 = ((A2B2\_0)\*(B2A1\_0))\*1000 ;  
D1B2A1\_0 = ((D1B2\_0)\*(B2A1\_0))\*1000 ;  
D2B2A1\_0 = ((D2B2\_0)\*(B2A1\_0))\*1000 ;  
D3B2A1\_0 = ((D3B2\_0)\*(B2A1\_0))\*1000 ;  
B1B2A1\_0 = ((B1B2\_0)\*(B2A1\_0))\*1000 ;  
B2B2A1\_0 = ((B2B2\_0)\*(B2A1\_0))\*1000 ;  
A1B2A2\_0 = ((A1B2\_0)\*(B2A2\_0))\*1000 ;  
A2B2A2\_0 = ((A2B2\_0)\*(B2A2\_0))\*1000 ;  
D1B2A2\_0 = ((D1B2\_0)\*(B2A2\_0))\*1000 ;  
D2B2A2\_0 = ((D2B2\_0)\*(B2A2\_0))\*1000 ;  
D3B2A2\_0 = ((D3B2\_0)\*(B2A2\_0))\*1000 ;  
B1B2A2\_0 = ((B1B2\_0)\*(B2A2\_0))\*1000 ;  
B2B2A2\_0 = ((B2B2\_0)\*(B2A2\_0))\*1000 ;  
A1B2D1\_0 = ((A1B2\_0)\*(B2D1\_0))\*1000 ;  
A2B2D1\_0 = ((A2B2\_0)\*(B2D1\_0))\*1000 ;  
D1B2D1\_0 = ((D1B2\_0)\*(B2D1\_0))\*1000 ;  
D2B2D1\_0 = ((D2B2\_0)\*(B2D1\_0))\*1000 ;  
D3B2D1\_0 = ((D3B2\_0)\*(B2D1\_0))\*1000 ;  
B1B2D1\_0 = ((B1B2\_0)\*(B2D1\_0))\*1000 ;  
B2B2D1\_0 = ((B2B2\_0)\*(B2D1\_0))\*1000 ;  
A1B2D2\_0 = ((A1B2\_0)\*(B2D2\_0))\*1000 ;  
A2B2D2\_0 = ((A2B2\_0)\*(B2D2\_0))\*1000 ;  
D1B2D2\_0 = ((D1B2\_0)\*(B2D2\_0))\*1000 ;  
D2B2D2\_0 = ((D2B2\_0)\*(B2D2\_0))\*1000 ;  
D3B2D2\_0 = ((D3B2\_0)\*(B2D2\_0))\*1000 ;  
B1B2D2\_0 = ((B1B2\_0)\*(B2D2\_0))\*1000 ;  
B2B2D2\_0 = ((B2B2\_0)\*(B2D2\_0))\*1000 ;  
A1B2D3\_0 = ((A1B2\_0)\*(B2D3\_0))\*1000 ;  
A2B2D3\_0 = ((A2B2\_0)\*(B2D3\_0))\*1000 ;  
D1B2D3\_0 = ((D1B2\_0)\*(B2D3\_0))\*1000 ;

D2B2D3\_0 = ((D2B2\_0)\*(B2D3\_0))\*1000 ;  
D3B2D3\_0 = ((D3B2\_0)\*(B2D3\_0))\*1000 ;  
B1B2D3\_0 = ((B1B2\_0)\*(B2D3\_0))\*1000 ;  
B2B2D3\_0 = ((B2B2\_0)\*(B2D3\_0))\*1000 ;  
A1B2B1\_0 = ((A1B2\_0)\*(B2B1\_0))\*1000 ;  
A2B2B1\_0 = ((A2B2\_0)\*(B2B1\_0))\*1000 ;  
D1B2B1\_0 = ((D1B2\_0)\*(B2B1\_0))\*1000 ;  
D2B2B1\_0 = ((D2B2\_0)\*(B2B1\_0))\*1000 ;  
D3B2B1\_0 = ((D3B2\_0)\*(B2B1\_0))\*1000 ;  
B1B2B1\_0 = ((B1B2\_0)\*(B2B1\_0))\*1000 ;  
B2B2B1\_0 = ((B2B2\_0)\*(B2B1\_0))\*1000 ;  
A1B2B2\_0 = ((A1B2\_0)\*(B2B2\_0))\*1000 ;  
A2B2B2\_0 = ((A2B2\_0)\*(B2B2\_0))\*1000 ;  
D1B2B2\_0 = ((D1B2\_0)\*(B2B2\_0))\*1000 ;  
D2B2B2\_0 = ((D2B2\_0)\*(B2B2\_0))\*1000 ;  
D3B2B2\_0 = ((D3B2\_0)\*(B2B2\_0))\*1000 ;  
B1B2B2\_0 = ((B1B2\_0)\*(B2B2\_0))\*1000 ;  
B2B2B2\_0 = ((B2B2\_0)\*(B2B2\_0))\*1000 ;

! indirect effects B2 group 1

NEW(A1B2A1\_1

A2B2A1\_1

D1B2A1\_1

D2B2A1\_1

D3B2A1\_1

B1B2A1\_1

B2B2A1\_1

A1B2A2\_1

A2B2A2\_1

D1B2A2\_1

D2B2A2\_1

D3B2A2\_1

B1B2A2\_1

B2B2A2\_1

A1B2D1\_1

A2B2D1\_1

D1B2D1\_1

D2B2D1\_1

D3B2D1\_1

B1B2D1\_1

B2B2D1\_1

A1B2D2\_1

A2B2D2\_1

D1B2D2\_1

D2B2D2\_1

D3B2D2\_1

B1B2D2\_1

B2B2D2\_1

A1B2D3\_1

A2B2D3\_1  
D1B2D3\_1  
D2B2D3\_1  
D3B2D3\_1  
B1B2D3\_1  
B2B2D3\_1  
A1B2B1\_1  
A2B2B1\_1  
D1B2B1\_1  
D2B2B1\_1  
D3B2B1\_1  
B1B2B1\_1  
B2B2B1\_1  
A1B2B2\_1  
A2B2B2\_1  
D1B2B2\_1  
D2B2B2\_1  
D3B2B2\_1  
B1B2B2\_1  
B2B2B2\_1);

A1B2A1\_1 = ((A1B2\_1)\*(B2A1\_1))\*1000 ;  
A2B2A1\_1 = ((A2B2\_1)\*(B2A1\_1))\*1000 ;  
D1B2A1\_1 = ((D1B2\_1)\*(B2A1\_1))\*1000 ;  
D2B2A1\_1 = ((D2B2\_1)\*(B2A1\_1))\*1000 ;  
D3B2A1\_1 = ((D3B2\_1)\*(B2A1\_1))\*1000 ;  
B1B2A1\_1 = ((B1B2\_1)\*(B2A1\_1))\*1000 ;  
B2B2A1\_1 = ((B2B2\_1)\*(B2A1\_1))\*1000 ;  
A1B2A2\_1 = ((A1B2\_1)\*(B2A2\_1))\*1000 ;  
A2B2A2\_1 = ((A2B2\_1)\*(B2A2\_1))\*1000 ;  
D1B2A2\_1 = ((D1B2\_1)\*(B2A2\_1))\*1000 ;  
D2B2A2\_1 = ((D2B2\_1)\*(B2A2\_1))\*1000 ;  
D3B2A2\_1 = ((D3B2\_1)\*(B2A2\_1))\*1000 ;  
B1B2A2\_1 = ((B1B2\_1)\*(B2A2\_1))\*1000 ;  
B2B2A2\_1 = ((B2B2\_1)\*(B2A2\_1))\*1000 ;  
A1B2D1\_1 = ((A1B2\_1)\*(B2D1\_1))\*1000 ;  
A2B2D1\_1 = ((A2B2\_1)\*(B2D1\_1))\*1000 ;  
D1B2D1\_1 = ((D1B2\_1)\*(B2D1\_1))\*1000 ;  
D2B2D1\_1 = ((D2B2\_1)\*(B2D1\_1))\*1000 ;  
D3B2D1\_1 = ((D3B2\_1)\*(B2D1\_1))\*1000 ;  
B1B2D1\_1 = ((B1B2\_1)\*(B2D1\_1))\*1000 ;  
B2B2D1\_1 = ((B2B2\_1)\*(B2D1\_1))\*1000 ;  
A1B2D2\_1 = ((A1B2\_1)\*(B2D2\_1))\*1000 ;  
A2B2D2\_1 = ((A2B2\_1)\*(B2D2\_1))\*1000 ;  
D1B2D2\_1 = ((D1B2\_1)\*(B2D2\_1))\*1000 ;  
D2B2D2\_1 = ((D2B2\_1)\*(B2D2\_1))\*1000 ;  
D3B2D2\_1 = ((D3B2\_1)\*(B2D2\_1))\*1000 ;  
B1B2D2\_1 = ((B1B2\_1)\*(B2D2\_1))\*1000 ;  
B2B2D2\_1 = ((B2B2\_1)\*(B2D2\_1))\*1000 ;  
A1B2D3\_1 = ((A1B2\_1)\*(B2D3\_1))\*1000 ;

A2B2D3\_1 = ((A2B2\_1)\*(B2D3\_1))\*1000 ;  
D1B2D3\_1 = ((D1B2\_1)\*(B2D3\_1))\*1000 ;  
D2B2D3\_1 = ((D2B2\_1)\*(B2D3\_1))\*1000 ;  
D3B2D3\_1 = ((D3B2\_1)\*(B2D3\_1))\*1000 ;  
B1B2D3\_1 = ((B1B2\_1)\*(B2D3\_1))\*1000 ;  
B2B2D3\_1 = ((B2B2\_1)\*(B2D3\_1))\*1000 ;  
A1B2B1\_1 = ((A1B2\_1)\*(B2B1\_1))\*1000 ;  
A2B2B1\_1 = ((A2B2\_1)\*(B2B1\_1))\*1000 ;  
D1B2B1\_1 = ((D1B2\_1)\*(B2B1\_1))\*1000 ;  
D2B2B1\_1 = ((D2B2\_1)\*(B2B1\_1))\*1000 ;  
D3B2B1\_1 = ((D3B2\_1)\*(B2B1\_1))\*1000 ;  
B1B2B1\_1 = ((B1B2\_1)\*(B2B1\_1))\*1000 ;  
B2B2B1\_1 = ((B2B2\_1)\*(B2B1\_1))\*1000 ;  
A1B2B2\_1 = ((A1B2\_1)\*(B2B2\_1))\*1000 ;  
A2B2B2\_1 = ((A2B2\_1)\*(B2B2\_1))\*1000 ;  
D1B2B2\_1 = ((D1B2\_1)\*(B2B2\_1))\*1000 ;  
D2B2B2\_1 = ((D2B2\_1)\*(B2B2\_1))\*1000 ;  
D3B2B2\_1 = ((D3B2\_1)\*(B2B2\_1))\*1000 ;  
B1B2B2\_1 = ((B1B2\_1)\*(B2B2\_1))\*1000 ;  
B2B2B2\_1 = ((B2B2\_1)\*(B2B2\_1))\*1000 ;

! indirect effects B2 group 2

NEW(A1B2A1\_2

A2B2A1\_2

D1B2A1\_2

D2B2A1\_2

D3B2A1\_2

B1B2A1\_2

B2B2A1\_2

A1B2A2\_2

A2B2A2\_2

D1B2A2\_2

D2B2A2\_2

D3B2A2\_2

B1B2A2\_2

B2B2A2\_2

A1B2D1\_2

A2B2D1\_2

D1B2D1\_2

D2B2D1\_2

D3B2D1\_2

B1B2D1\_2

B2B2D1\_2

A1B2D2\_2

A2B2D2\_2

D1B2D2\_2

D2B2D2\_2

D3B2D2\_2

B1B2D2\_2

B2B2D2\_2  
A1B2D3\_2  
A2B2D3\_2  
D1B2D3\_2  
D2B2D3\_2  
D3B2D3\_2  
B1B2D3\_2  
B2B2D3\_2  
A1B2B1\_2  
A2B2B1\_2  
D1B2B1\_2  
D2B2B1\_2  
D3B2B1\_2  
B1B2B1\_2  
B2B2B1\_2  
A1B2B2\_2  
A2B2B2\_2  
D1B2B2\_2  
D2B2B2\_2  
D3B2B2\_2  
B1B2B2\_2  
B2B2B2\_2);

A1B2A1\_2 = ((A1B2\_2)\*(B2A1\_2))\*1000 ;  
A2B2A1\_2 = ((A2B2\_2)\*(B2A1\_2))\*1000 ;  
D1B2A1\_2 = ((D1B2\_2)\*(B2A1\_2))\*1000 ;  
D2B2A1\_2 = ((D2B2\_2)\*(B2A1\_2))\*1000 ;  
D3B2A1\_2 = ((D3B2\_2)\*(B2A1\_2))\*1000 ;  
B1B2A1\_2 = ((B1B2\_2)\*(B2A1\_2))\*1000 ;  
B2B2A1\_2 = ((B2B2\_2)\*(B2A1\_2))\*1000 ;  
A1B2A2\_2 = ((A1B2\_2)\*(B2A2\_2))\*1000 ;  
A2B2A2\_2 = ((A2B2\_2)\*(B2A2\_2))\*1000 ;  
D1B2A2\_2 = ((D1B2\_2)\*(B2A2\_2))\*1000 ;  
D2B2A2\_2 = ((D2B2\_2)\*(B2A2\_2))\*1000 ;  
D3B2A2\_2 = ((D3B2\_2)\*(B2A2\_2))\*1000 ;  
B1B2A2\_2 = ((B1B2\_2)\*(B2A2\_2))\*1000 ;  
B2B2A2\_2 = ((B2B2\_2)\*(B2A2\_2))\*1000 ;  
A1B2D1\_2 = ((A1B2\_2)\*(B2D1\_2))\*1000 ;  
A2B2D1\_2 = ((A2B2\_2)\*(B2D1\_2))\*1000 ;  
D1B2D1\_2 = ((D1B2\_2)\*(B2D1\_2))\*1000 ;  
D2B2D1\_2 = ((D2B2\_2)\*(B2D1\_2))\*1000 ;  
D3B2D1\_2 = ((D3B2\_2)\*(B2D1\_2))\*1000 ;  
B1B2D1\_2 = ((B1B2\_2)\*(B2D1\_2))\*1000 ;  
B2B2D1\_2 = ((B2B2\_2)\*(B2D1\_2))\*1000 ;  
A1B2D2\_2 = ((A1B2\_2)\*(B2D2\_2))\*1000 ;  
A2B2D2\_2 = ((A2B2\_2)\*(B2D2\_2))\*1000 ;  
D1B2D2\_2 = ((D1B2\_2)\*(B2D2\_2))\*1000 ;  
D2B2D2\_2 = ((D2B2\_2)\*(B2D2\_2))\*1000 ;  
D3B2D2\_2 = ((D3B2\_2)\*(B2D2\_2))\*1000 ;  
B1B2D2\_2 = ((B1B2\_2)\*(B2D2\_2))\*1000 ;

$B2B2D2\_2 = ((B2B2\_2)*(B2D2\_2))*1000 ;$   
 $A1B2D3\_2 = ((A1B2\_2)*(B2D3\_2))*1000 ;$   
 $A2B2D3\_2 = ((A2B2\_2)*(B2D3\_2))*1000 ;$   
 $D1B2D3\_2 = ((D1B2\_2)*(B2D3\_2))*1000 ;$   
 $D2B2D3\_2 = ((D2B2\_2)*(B2D3\_2))*1000 ;$   
 $D3B2D3\_2 = ((D3B2\_2)*(B2D3\_2))*1000 ;$   
 $B1B2D3\_2 = ((B1B2\_2)*(B2D3\_2))*1000 ;$   
 $B2B2D3\_2 = ((B2B2\_2)*(B2D3\_2))*1000 ;$   
 $A1B2B1\_2 = ((A1B2\_2)*(B2B1\_2))*1000 ;$   
 $A2B2B1\_2 = ((A2B2\_2)*(B2B1\_2))*1000 ;$   
 $D1B2B1\_2 = ((D1B2\_2)*(B2B1\_2))*1000 ;$   
 $D2B2B1\_2 = ((D2B2\_2)*(B2B1\_2))*1000 ;$   
 $D3B2B1\_2 = ((D3B2\_2)*(B2B1\_2))*1000 ;$   
 $B1B2B1\_2 = ((B1B2\_2)*(B2B1\_2))*1000 ;$   
 $B2B2B1\_2 = ((B2B2\_2)*(B2B1\_2))*1000 ;$   
 $A1B2B2\_2 = ((A1B2\_2)*(B2B2\_2))*1000 ;$   
 $A2B2B2\_2 = ((A2B2\_2)*(B2B2\_2))*1000 ;$   
 $D1B2B2\_2 = ((D1B2\_2)*(B2B2\_2))*1000 ;$   
 $D2B2B2\_2 = ((D2B2\_2)*(B2B2\_2))*1000 ;$   
 $D3B2B2\_2 = ((D3B2\_2)*(B2B2\_2))*1000 ;$   
 $B1B2B2\_2 = ((B1B2\_2)*(B2B2\_2))*1000 ;$   
 $B2B2B2\_2 = ((B2B2\_2)*(B2B2\_2))*1000 ;$

! Summaries of all indirect effects

! all indirect effects A1 group 0

$NEW(aiA1\_0);$   
 $aiA1\_0 = A1A1A1\_0 +$   
 $A2A1A1\_0 +$   
 $D1A1A1\_0 +$   
 $D2A1A1\_0 +$   
 $D3A1A1\_0 +$   
 $B1A1A1\_0 +$   
 $B2A1A1\_0 +$   
 $A1A1A2\_0 +$   
 $A2A1A2\_0 +$   
 $D1A1A2\_0 +$   
 $D2A1A2\_0 +$   
 $D3A1A2\_0 +$   
 $B1A1A2\_0 +$   
 $B2A1A2\_0 +$   
 $A1A1D1\_0 +$   
 $A2A1D1\_0 +$   
 $D1A1D1\_0 +$   
 $D2A1D1\_0 +$   
 $D3A1D1\_0 +$   
 $B1A1D1\_0 +$

B2A1D1\_0 +  
A1A1D2\_0 +  
A2A1D2\_0 +  
D1A1D2\_0 +  
D2A1D2\_0 +  
D3A1D2\_0 +  
B1A1D2\_0 +  
B2A1D2\_0 +  
A1A1D3\_0 +  
A2A1D3\_0 +  
D1A1D3\_0 +  
D2A1D3\_0 +  
D3A1D3\_0 +  
B1A1D3\_0 +  
B2A1D3\_0 +  
A1A1B1\_0 +  
A2A1B1\_0 +  
D1A1B1\_0 +  
D2A1B1\_0 +  
D3A1B1\_0 +  
B1A1B1\_0 +  
B2A1B1\_0 +  
A1A1B2\_0 +  
A2A1B2\_0 +  
D1A1B2\_0 +  
D2A1B2\_0 +  
D3A1B2\_0 +  
B1A1B2\_0 +  
B2A1B2\_0;

! all indirect effects A1 group 1

NEW(aiA1\_1);

aiA1\_1 = A1A1A1\_1 +

A2A1A1\_1 +  
D1A1A1\_1 +  
D2A1A1\_1 +  
D3A1A1\_1 +  
B1A1A1\_1 +  
B2A1A1\_1 +  
A1A1A2\_1 +  
A2A1A2\_1 +  
D1A1A2\_1 +  
D2A1A2\_1 +  
D3A1A2\_1 +  
B1A1A2\_1 +  
B2A1A2\_1 +  
A1A1D1\_1 +  
A2A1D1\_1 +  
D1A1D1\_1 +



D2A1D1\_1 +  
D3A1D1\_1 +  
B1A1D1\_1 +  
B2A1D1\_1 +  
A1A1D2\_1 +  
A2A1D2\_1 +  
D1A1D2\_1 +  
D2A1D2\_1 +  
D3A1D2\_1 +  
B1A1D2\_1 +  
B2A1D2\_1 +  
A1A1D3\_1 +  
A2A1D3\_1 +  
D1A1D3\_1 +  
D2A1D3\_1 +  
D3A1D3\_1 +  
B1A1D3\_1 +  
B2A1D3\_1 +  
A1A1B1\_1 +  
A2A1B1\_1 +  
D1A1B1\_1 +  
D2A1B1\_1 +  
D3A1B1\_1 +  
B1A1B1\_1 +  
B2A1B1\_1 +  
A1A1B2\_1 +  
A2A1B2\_1 +  
D1A1B2\_1 +  
D2A1B2\_1 +  
D3A1B2\_1 +  
B1A1B2\_1 +  
B2A1B2\_1;

! all indirect effects A1 group 2

NEW(aiA1\_2);

aiA1\_2 = A1A1A1\_2 +

A2A1A1\_2 +  
D1A1A1\_2 +  
D2A1A1\_2 +  
D3A1A1\_2 +  
B1A1A1\_2 +  
B2A1A1\_2 +  
A1A1A2\_2 +  
A2A1A2\_2 +  
D1A1A2\_2 +  
D2A1A2\_2 +  
D3A1A2\_2 +  
B1A1A2\_2 +  
B2A1A2\_2 +

A1A1D1\_2 +  
A2A1D1\_2 +  
D1A1D1\_2 +  
D2A1D1\_2 +  
D3A1D1\_2 +  
B1A1D1\_2 +  
B2A1D1\_2 +  
A1A1D2\_2 +  
A2A1D2\_2 +  
D1A1D2\_2 +  
D2A1D2\_2 +  
D3A1D2\_2 +  
B1A1D2\_2 +  
B2A1D2\_2 +  
A1A1D3\_2 +  
A2A1D3\_2 +  
D1A1D3\_2 +  
D2A1D3\_2 +  
D3A1D3\_2 +  
B1A1D3\_2 +  
B2A1D3\_2 +  
A1A1B1\_2 +  
A2A1B1\_2 +  
D1A1B1\_2 +  
D2A1B1\_2 +  
D3A1B1\_2 +  
B1A1B1\_2 +  
B2A1B1\_2 +  
A1A1B2\_2 +  
A2A1B2\_2 +  
D1A1B2\_2 +  
D2A1B2\_2 +  
D3A1B2\_2 +  
B1A1B2\_2 +  
B2A1B2\_2;

! all indirect effects A2 group 0

NEW(aiA2\_0);

aiA2\_0 = A1A2A1\_0 +

A2A2A1\_0 +  
D1A2A1\_0 +  
D2A2A1\_0 +  
D3A2A1\_0 +  
B1A2A1\_0 +  
B2A2A1\_0 +  
A1A2A2\_0 +  
A2A2A2\_0 +  
D1A2A2\_0 +  
D2A2A2\_0 +

D3A2A2\_0 +  
B1A2A2\_0 +  
B2A2A2\_0 +  
A1A2D1\_0 +  
A2A2D1\_0 +  
D1A2D1\_0 +  
D2A2D1\_0 +  
D3A2D1\_0 +  
B1A2D1\_0 +  
B2A2D1\_0 +  
A1A2D2\_0 +  
A2A2D2\_0 +  
D1A2D2\_0 +  
D2A2D2\_0 +  
D3A2D2\_0 +  
B1A2D2\_0 +  
B2A2D2\_0 +  
A1A2D3\_0 +  
A2A2D3\_0 +  
D1A2D3\_0 +  
D2A2D3\_0 +  
D3A2D3\_0 +  
B1A2D3\_0 +  
B2A2D3\_0 +  
A1A2B1\_0 +  
A2A2B1\_0 +  
D1A2B1\_0 +  
D2A2B1\_0 +  
D3A2B1\_0 +  
B1A2B1\_0 +  
B2A2B1\_0 +  
A1A2B2\_0 +  
A2A2B2\_0 +  
D1A2B2\_0 +  
D2A2B2\_0 +  
D3A2B2\_0 +  
B1A2B2\_0 +  
B2A2B2\_0;

! all indirect effects A2 group 1

NEW(aiA2\_1);

aiA2\_1 = A1A2A1\_1 +

A2A2A1\_1 +  
D1A2A1\_1 +  
D2A2A1\_1 +  
D3A2A1\_1 +  
B1A2A1\_1 +  
B2A2A1\_1 +  
A1A2A2\_1 +

A2A2A2\_1 +  
D1A2A2\_1 +  
D2A2A2\_1 +  
D3A2A2\_1 +  
B1A2A2\_1 +  
B2A2A2\_1 +  
A1A2D1\_1 +  
A2A2D1\_1 +  
D1A2D1\_1 +  
D2A2D1\_1 +  
D3A2D1\_1 +  
B1A2D1\_1 +  
B2A2D1\_1 +  
A1A2D2\_1 +  
A2A2D2\_1 +  
D1A2D2\_1 +  
D2A2D2\_1 +  
D3A2D2\_1 +  
B1A2D2\_1 +  
B2A2D2\_1 +  
A1A2D3\_1 +  
A2A2D3\_1 +  
D1A2D3\_1 +  
D2A2D3\_1 +  
D3A2D3\_1 +  
B1A2D3\_1 +  
B2A2D3\_1 +  
A1A2B1\_1 +  
A2A2B1\_1 +  
D1A2B1\_1 +  
D2A2B1\_1 +  
D3A2B1\_1 +  
B1A2B1\_1 +  
B2A2B1\_1 +  
A1A2B2\_1 +  
A2A2B2\_1 +  
D1A2B2\_1 +  
D2A2B2\_1 +  
D3A2B2\_1 +  
B1A2B2\_1 +  
B2A2B2\_1;

! all indirect effects A2 group 2

NEW(aiA2\_2);

aiA2\_2 = A1A2A1\_2 +

A2A2A1\_2 +  
D1A2A1\_2 +  
D2A2A1\_2 +  
D3A2A1\_2 +

B1A2A1\_2 +  
B2A2A1\_2 +  
A1A2A2\_2 +  
A2A2A2\_2 +  
D1A2A2\_2 +  
D2A2A2\_2 +  
D3A2A2\_2 +  
B1A2A2\_2 +  
B2A2A2\_2 +  
A1A2D1\_2 +  
A2A2D1\_2 +  
D1A2D1\_2 +  
D2A2D1\_2 +  
D3A2D1\_2 +  
B1A2D1\_2 +  
B2A2D1\_2 +  
A1A2D2\_2 +  
A2A2D2\_2 +  
D1A2D2\_2 +  
D2A2D2\_2 +  
D3A2D2\_2 +  
B1A2D2\_2 +  
B2A2D2\_2 +  
A1A2D3\_2 +  
A2A2D3\_2 +  
D1A2D3\_2 +  
D2A2D3\_2 +  
D3A2D3\_2 +  
B1A2D3\_2 +  
B2A2D3\_2 +  
A1A2B1\_2 +  
A2A2B1\_2 +  
D1A2B1\_2 +  
D2A2B1\_2 +  
D3A2B1\_2 +  
B1A2B1\_2 +  
B2A2B1\_2 +  
A1A2B2\_2 +  
A2A2B2\_2 +  
D1A2B2\_2 +  
D2A2B2\_2 +  
D3A2B2\_2 +  
B1A2B2\_2 +  
B2A2B2\_2;

! all indirect effects D1 group 0

NEW(aiD1\_0);

aiD1\_0 = A1D1A1\_0 +

A2D1A1\_0 +

D1D1A1\_0 +  
D2D1A1\_0 +  
D3D1A1\_0 +  
B1D1A1\_0 +  
B2D1A1\_0 +  
A1D1A2\_0 +  
A2D1A2\_0 +  
D1D1A2\_0 +  
D2D1A2\_0 +  
D3D1A2\_0 +  
B1D1A2\_0 +  
B2D1A2\_0 +  
A1D1D1\_0 +  
A2D1D1\_0 +  
D1D1D1\_0 +  
D2D1D1\_0 +  
D3D1D1\_0 +  
B1D1D1\_0 +  
B2D1D1\_0 +  
A1D1D2\_0 +  
A2D1D2\_0 +  
D1D1D2\_0 +  
D2D1D2\_0 +  
D3D1D2\_0 +  
B1D1D2\_0 +  
B2D1D2\_0 +  
A1D1D3\_0 +  
A2D1D3\_0 +  
D1D1D3\_0 +  
D2D1D3\_0 +  
D3D1D3\_0 +  
B1D1D3\_0 +  
B2D1D3\_0 +  
A1D1B1\_0 +  
A2D1B1\_0 +  
D1D1B1\_0 +  
D2D1B1\_0 +  
D3D1B1\_0 +  
B1D1B1\_0 +  
B2D1B1\_0 +  
A1D1B2\_0 +  
A2D1B2\_0 +  
D1D1B2\_0 +  
D2D1B2\_0 +  
D3D1B2\_0 +  
B1D1B2\_0 +  
B2D1B2\_0;

! all indirect effects D1 group 1

NEW(aiD1\_1);  
aiD1\_1 = A1D1A1\_1 +  
A2D1A1\_1 +  
D1D1A1\_1 +  
D2D1A1\_1 +  
D3D1A1\_1 +  
B1D1A1\_1 +  
B2D1A1\_1 +  
A1D1A2\_1 +  
A2D1A2\_1 +  
D1D1A2\_1 +  
D2D1A2\_1 +  
D3D1A2\_1 +  
B1D1A2\_1 +  
B2D1A2\_1 +  
A1D1D1\_1 +  
A2D1D1\_1 +  
D1D1D1\_1 +  
D2D1D1\_1 +  
D3D1D1\_1 +  
B1D1D1\_1 +  
B2D1D1\_1 +  
A1D1D2\_1 +  
A2D1D2\_1 +  
D1D1D2\_1 +  
D2D1D2\_1 +  
D3D1D2\_1 +  
B1D1D2\_1 +  
B2D1D2\_1 +  
A1D1D3\_1 +  
A2D1D3\_1 +  
D1D1D3\_1 +  
D2D1D3\_1 +  
D3D1D3\_1 +  
B1D1D3\_1 +  
B2D1D3\_1 +  
A1D1B1\_1 +  
A2D1B1\_1 +  
D1D1B1\_1 +  
D2D1B1\_1 +  
D3D1B1\_1 +  
B1D1B1\_1 +  
B2D1B1\_1 +  
A1D1B2\_1 +  
A2D1B2\_1 +  
D1D1B2\_1 +  
D2D1B2\_1 +  
D3D1B2\_1 +  
B1D1B2\_1 +

B2D1B2\_1;

! all indirect effects D1 group 2

NEW(aiD1\_2);

aiD1\_2 = A1D1A1\_2 +

A2D1A1\_2 +

D1D1A1\_2 +

D2D1A1\_2 +

D3D1A1\_2 +

B1D1A1\_2 +

B2D1A1\_2 +

A1D1A2\_2 +

A2D1A2\_2 +

D1D1A2\_2 +

D2D1A2\_2 +

D3D1A2\_2 +

B1D1A2\_2 +

B2D1A2\_2 +

A1D1D1\_2 +

A2D1D1\_2 +

D1D1D1\_2 +

D2D1D1\_2 +

D3D1D1\_2 +

B1D1D1\_2 +

B2D1D1\_2 +

A1D1D2\_2 +

A2D1D2\_2 +

D1D1D2\_2 +

D2D1D2\_2 +

D3D1D2\_2 +

B1D1D2\_2 +

B2D1D2\_2 +

A1D1D3\_2 +

A2D1D3\_2 +

D1D1D3\_2 +

D2D1D3\_2 +

D3D1D3\_2 +

B1D1D3\_2 +

B2D1D3\_2 +

A1D1B1\_2 +

A2D1B1\_2 +

D1D1B1\_2 +

D2D1B1\_2 +

D3D1B1\_2 +

B1D1B1\_2 +

B2D1B1\_2 +

A1D1B2\_2 +

A2D1B2\_2 +

D1D1B2\_2 +



D2D1B2\_2 +  
D3D1B2\_2 +  
B1D1B2\_2 +  
B2D1B2\_2;

! all indirect effects D2 group 0

NEW(aiD2\_0);

aiD2\_0 = A1D2A1\_0 +

A2D2A1\_0 +

D1D2A1\_0 +

D2D2A1\_0 +

D3D2A1\_0 +

B1D2A1\_0 +

B2D2A1\_0 +

A1D2A2\_0 +

A2D2A2\_0 +

D1D2A2\_0 +

D2D2A2\_0 +

D3D2A2\_0 +

B1D2A2\_0 +

B2D2A2\_0 +

A1D2D1\_0 +

A2D2D1\_0 +

D1D2D1\_0 +

D2D2D1\_0 +

D3D2D1\_0 +

B1D2D1\_0 +

B2D2D1\_0 +

A1D2D2\_0 +

A2D2D2\_0 +

D1D2D2\_0 +

D2D2D2\_0 +

D3D2D2\_0 +

B1D2D2\_0 +

B2D2D2\_0 +

A1D2D3\_0 +

A2D2D3\_0 +

D1D2D3\_0 +

D2D2D3\_0 +

D3D2D3\_0 +

B1D2D3\_0 +

B2D2D3\_0 +

A1D2B1\_0 +

A2D2B1\_0 +

D1D2B1\_0 +

D2D2B1\_0 +

D3D2B1\_0 +

B1D2B1\_0 +

B2D2B1\_0 +

A1D2B2\_0 +  
A2D2B2\_0 +  
D1D2B2\_0 +  
D2D2B2\_0 +  
D3D2B2\_0 +  
B1D2B2\_0 +  
B2D2B2\_0;

! all indirect effects D2 group 1

NEW(aiD2\_1);

aiD2\_1 = A1D2A1\_1 +

A2D2A1\_1 +  
D1D2A1\_1 +  
D2D2A1\_1 +  
D3D2A1\_1 +  
B1D2A1\_1 +  
B2D2A1\_1 +  
A1D2A2\_1 +  
A2D2A2\_1 +  
D1D2A2\_1 +  
D2D2A2\_1 +  
D3D2A2\_1 +  
B1D2A2\_1 +  
B2D2A2\_1 +  
A1D2D1\_1 +  
A2D2D1\_1 +  
D1D2D1\_1 +  
D2D2D1\_1 +  
D3D2D1\_1 +  
B1D2D1\_1 +  
B2D2D1\_1 +  
A1D2D2\_1 +  
A2D2D2\_1 +  
D1D2D2\_1 +  
D2D2D2\_1 +  
D3D2D2\_1 +  
B1D2D2\_1 +  
B2D2D2\_1 +  
A1D2D3\_1 +  
A2D2D3\_1 +  
D1D2D3\_1 +  
D2D2D3\_1 +  
D3D2D3\_1 +  
B1D2D3\_1 +  
B2D2D3\_1 +  
A1D2B1\_1 +  
A2D2B1\_1 +  
D1D2B1\_1 +  
D2D2B1\_1 +

D3D2B1\_1 +  
B1D2B1\_1 +  
B2D2B1\_1 +  
A1D2B2\_1 +  
A2D2B2\_1 +  
D1D2B2\_1 +  
D2D2B2\_1 +  
D3D2B2\_1 +  
B1D2B2\_1 +  
B2D2B2\_1;

! all indirect effects D2 group 2

NEW(aiD2\_2);

aiD2\_2 = A1D2A1\_2 +

A2D2A1\_2 +  
D1D2A1\_2 +  
D2D2A1\_2 +  
D3D2A1\_2 +  
B1D2A1\_2 +  
B2D2A1\_2 +  
A1D2A2\_2 +  
A2D2A2\_2 +  
D1D2A2\_2 +  
D2D2A2\_2 +  
D3D2A2\_2 +  
B1D2A2\_2 +  
B2D2A2\_2 +  
A1D2D1\_2 +  
A2D2D1\_2 +  
D1D2D1\_2 +  
D2D2D1\_2 +  
D3D2D1\_2 +  
B1D2D1\_2 +  
B2D2D1\_2 +  
A1D2D2\_2 +  
A2D2D2\_2 +  
D1D2D2\_2 +  
D2D2D2\_2 +  
D3D2D2\_2 +  
B1D2D2\_2 +  
B2D2D2\_2 +  
A1D2D3\_2 +  
A2D2D3\_2 +  
D1D2D3\_2 +  
D2D2D3\_2 +  
D3D2D3\_2 +  
B1D2D3\_2 +  
B2D2D3\_2 +  
A1D2B1\_2 +

A2D2B1\_2 +  
D1D2B1\_2 +  
D2D2B1\_2 +  
D3D2B1\_2 +  
B1D2B1\_2 +  
B2D2B1\_2 +  
A1D2B2\_2 +  
A2D2B2\_2 +  
D1D2B2\_2 +  
D2D2B2\_2 +  
D3D2B2\_2 +  
B1D2B2\_2 +  
B2D2B2\_2;

! all indirect effects D3 group 0

NEW(aiD3\_0);

aiD3\_0 = A1D3A1\_0 +

A2D3A1\_0 +  
D1D3A1\_0 +  
D2D3A1\_0 +  
D3D3A1\_0 +  
B1D3A1\_0 +  
B2D3A1\_0 +  
A1D3A2\_0 +  
A2D3A2\_0 +  
D1D3A2\_0 +  
D2D3A2\_0 +  
D3D3A2\_0 +  
B1D3A2\_0 +  
B2D3A2\_0 +  
A1D3D1\_0 +  
A2D3D1\_0 +  
D1D3D1\_0 +  
D2D3D1\_0 +  
D3D3D1\_0 +  
B1D3D1\_0 +  
B2D3D1\_0 +  
A1D3D2\_0 +  
A2D3D2\_0 +  
D1D3D2\_0 +  
D2D3D2\_0 +  
D3D3D2\_0 +  
B1D3D2\_0 +  
B2D3D2\_0 +  
A1D3D3\_0 +  
A2D3D3\_0 +  
D1D3D3\_0 +  
D2D3D3\_0 +  
D3D3D3\_0 +

B1D3D3\_0 +  
B2D3D3\_0 +  
A1D3B1\_0 +  
A2D3B1\_0 +  
D1D3B1\_0 +  
D2D3B1\_0 +  
D3D3B1\_0 +  
B1D3B1\_0 +  
B2D3B1\_0 +  
A1D3B2\_0 +  
A2D3B2\_0 +  
D1D3B2\_0 +  
D2D3B2\_0 +  
D3D3B2\_0 +  
B1D3B2\_0 +  
B2D3B2\_0;

! all indirect effects D3 group 1

NEW(aiD3\_1);

aiD3\_1 = A1D3A1\_1 +

A2D3A1\_1 +  
D1D3A1\_1 +  
D2D3A1\_1 +  
D3D3A1\_1 +  
B1D3A1\_1 +  
B2D3A1\_1 +  
A1D3A2\_1 +  
A2D3A2\_1 +  
D1D3A2\_1 +  
D2D3A2\_1 +  
D3D3A2\_1 +  
B1D3A2\_1 +  
B2D3A2\_1 +  
A1D3D1\_1 +  
A2D3D1\_1 +  
D1D3D1\_1 +  
D2D3D1\_1 +  
D3D3D1\_1 +  
B1D3D1\_1 +  
B2D3D1\_1 +  
A1D3D2\_1 +  
A2D3D2\_1 +  
D1D3D2\_1 +  
D2D3D2\_1 +  
D3D3D2\_1 +  
B1D3D2\_1 +  
B2D3D2\_1 +  
A1D3D3\_1 +  
A2D3D3\_1 +

D1D3D3\_1 +  
D2D3D3\_1 +  
D3D3D3\_1 +  
B1D3D3\_1 +  
B2D3D3\_1 +  
A1D3B1\_1 +  
A2D3B1\_1 +  
D1D3B1\_1 +  
D2D3B1\_1 +  
D3D3B1\_1 +  
B1D3B1\_1 +  
B2D3B1\_1 +  
A1D3B2\_1 +  
A2D3B2\_1 +  
D1D3B2\_1 +  
D2D3B2\_1 +  
D3D3B2\_1 +  
B1D3B2\_1 +  
B2D3B2\_1;

! all indirect effects D3 group 2

NEW(aiD3\_2);

aiD3\_2 = A1D3A1\_2 +

A2D3A1\_2 +  
D1D3A1\_2 +  
D2D3A1\_2 +  
D3D3A1\_2 +  
B1D3A1\_2 +  
B2D3A1\_2 +  
A1D3A2\_2 +  
A2D3A2\_2 +  
D1D3A2\_2 +  
D2D3A2\_2 +  
D3D3A2\_2 +  
B1D3A2\_2 +  
B2D3A2\_2 +  
A1D3D1\_2 +  
A2D3D1\_2 +  
D1D3D1\_2 +  
D2D3D1\_2 +  
D3D3D1\_2 +  
B1D3D1\_2 +  
B2D3D1\_2 +  
A1D3D2\_2 +  
A2D3D2\_2 +  
D1D3D2\_2 +  
D2D3D2\_2 +  
D3D3D2\_2 +  
B1D3D2\_2 +

B2D3D2\_2 +  
A1D3D3\_2 +  
A2D3D3\_2 +  
D1D3D3\_2 +  
D2D3D3\_2 +  
D3D3D3\_2 +  
B1D3D3\_2 +  
B2D3D3\_2 +  
A1D3B1\_2 +  
A2D3B1\_2 +  
D1D3B1\_2 +  
D2D3B1\_2 +  
D3D3B1\_2 +  
B1D3B1\_2 +  
B2D3B1\_2 +  
A1D3B2\_2 +  
A2D3B2\_2 +  
D1D3B2\_2 +  
D2D3B2\_2 +  
D3D3B2\_2 +  
B1D3B2\_2 +  
B2D3B2\_2;

! all indirect effects B1 group 0

NEW(aiB1\_0);

aiB1\_0 = A1B1A1\_0 +

A2B1A1\_0 +  
D1B1A1\_0 +  
D2B1A1\_0 +  
D3B1A1\_0 +  
B1B1A1\_0 +  
B2B1A1\_0 +  
A1B1A2\_0 +  
A2B1A2\_0 +  
D1B1A2\_0 +  
D2B1A2\_0 +  
D3B1A2\_0 +  
B1B1A2\_0 +  
B2B1A2\_0 +  
A1B1D1\_0 +  
A2B1D1\_0 +  
D1B1D1\_0 +  
D2B1D1\_0 +  
D3B1D1\_0 +  
B1B1D1\_0 +  
B2B1D1\_0 +  
A1B1D2\_0 +  
A2B1D2\_0 +  
D1B1D2\_0 +

D2B1D2\_0 +  
D3B1D2\_0 +  
B1B1D2\_0 +  
B2B1D2\_0 +  
A1B1D3\_0 +  
A2B1D3\_0 +  
D1B1D3\_0 +  
D2B1D3\_0 +  
D3B1D3\_0 +  
B1B1D3\_0 +  
B2B1D3\_0 +  
A1B1B1\_0 +  
A2B1B1\_0 +  
D1B1B1\_0 +  
D2B1B1\_0 +  
D3B1B1\_0 +  
B1B1B1\_0 +  
B2B1B1\_0 +  
A1B1B2\_0 +  
A2B1B2\_0 +  
D1B1B2\_0 +  
D2B1B2\_0 +  
D3B1B2\_0 +  
B1B1B2\_0 +  
B2B1B2\_0;

! all indirect effects B1 group 1

NEW(aiB1\_1);

aiB1\_1 = A1B1A1\_1 +

A2B1A1\_1 +  
D1B1A1\_1 +  
D2B1A1\_1 +  
D3B1A1\_1 +  
B1B1A1\_1 +  
B2B1A1\_1 +  
A1B1A2\_1 +  
A2B1A2\_1 +  
D1B1A2\_1 +  
D2B1A2\_1 +  
D3B1A2\_1 +  
B1B1A2\_1 +  
B2B1A2\_1 +  
A1B1D1\_1 +  
A2B1D1\_1 +  
D1B1D1\_1 +  
D2B1D1\_1 +  
D3B1D1\_1 +  
B1B1D1\_1 +  
B2B1D1\_1 +



A1B1D2\_1 +  
A2B1D2\_1 +  
D1B1D2\_1 +  
D2B1D2\_1 +  
D3B1D2\_1 +  
B1B1D2\_1 +  
B2B1D2\_1 +  
A1B1D3\_1 +  
A2B1D3\_1 +  
D1B1D3\_1 +  
D2B1D3\_1 +  
D3B1D3\_1 +  
B1B1D3\_1 +  
B2B1D3\_1 +  
A1B1B1\_1 +  
A2B1B1\_1 +  
D1B1B1\_1 +  
D2B1B1\_1 +  
D3B1B1\_1 +  
B1B1B1\_1 +  
B2B1B1\_1 +  
A1B1B2\_1 +  
A2B1B2\_1 +  
D1B1B2\_1 +  
D2B1B2\_1 +  
D3B1B2\_1 +  
B1B1B2\_1 +  
B2B1B2\_1;

! all indirect effects B1 group 2

NEW(aiB1\_2);

aiB1\_2 = A1B1A1\_2 +

A2B1A1\_2 +  
D1B1A1\_2 +  
D2B1A1\_2 +  
D3B1A1\_2 +  
B1B1A1\_2 +  
B2B1A1\_2 +  
A1B1A2\_2 +  
A2B1A2\_2 +  
D1B1A2\_2 +  
D2B1A2\_2 +  
D3B1A2\_2 +  
B1B1A2\_2 +  
B2B1A2\_2 +  
A1B1D1\_2 +  
A2B1D1\_2 +  
D1B1D1\_2 +  
D2B1D1\_2 +

D3B1D1\_2 +  
B1B1D1\_2 +  
B2B1D1\_2 +  
A1B1D2\_2 +  
A2B1D2\_2 +  
D1B1D2\_2 +  
D2B1D2\_2 +  
D3B1D2\_2 +  
B1B1D2\_2 +  
B2B1D2\_2 +  
A1B1D3\_2 +  
A2B1D3\_2 +  
D1B1D3\_2 +  
D2B1D3\_2 +  
D3B1D3\_2 +  
B1B1D3\_2 +  
B2B1D3\_2 +  
A1B1B1\_2 +  
A2B1B1\_2 +  
D1B1B1\_2 +  
D2B1B1\_2 +  
D3B1B1\_2 +  
B1B1B1\_2 +  
B2B1B1\_2 +  
A1B1B2\_2 +  
A2B1B2\_2 +  
D1B1B2\_2 +  
D2B1B2\_2 +  
D3B1B2\_2 +  
B1B1B2\_2 +  
B2B1B2\_2;

! all indirect effects B2 group 0

NEW(aiB2\_0);

aiB2\_0 = A1B2A1\_0 +

A2B2A1\_0 +  
D1B2A1\_0 +  
D2B2A1\_0 +  
D3B2A1\_0 +  
B1B2A1\_0 +  
B2B2A1\_0 +  
A1B2A2\_0 +  
A2B2A2\_0 +  
D1B2A2\_0 +  
D2B2A2\_0 +  
D3B2A2\_0 +  
B1B2A2\_0 +  
B2B2A2\_0 +  
A1B2D1\_0 +

A2B2D1\_0 +  
D1B2D1\_0 +  
D2B2D1\_0 +  
D3B2D1\_0 +  
B1B2D1\_0 +  
B2B2D1\_0 +  
A1B2D2\_0 +  
A2B2D2\_0 +  
D1B2D2\_0 +  
D2B2D2\_0 +  
D3B2D2\_0 +  
B1B2D2\_0 +  
B2B2D2\_0 +  
A1B2D3\_0 +  
A2B2D3\_0 +  
D1B2D3\_0 +  
D2B2D3\_0 +  
D3B2D3\_0 +  
B1B2D3\_0 +  
B2B2D3\_0 +  
A1B2B1\_0 +  
A2B2B1\_0 +  
D1B2B1\_0 +  
D2B2B1\_0 +  
D3B2B1\_0 +  
B1B2B1\_0 +  
B2B2B1\_0 +  
A1B2B2\_0 +  
A2B2B2\_0 +  
D1B2B2\_0 +  
D2B2B2\_0 +  
D3B2B2\_0 +  
B1B2B2\_0 +  
B2B2B2\_0;

! all indirect effects B2 group 1

NEW(aiB2\_1);

aiB2\_1 = A1B2A1\_1 +

A2B2A1\_1 +  
D1B2A1\_1 +  
D2B2A1\_1 +  
D3B2A1\_1 +  
B1B2A1\_1 +  
B2B2A1\_1 +  
A1B2A2\_1 +  
A2B2A2\_1 +  
D1B2A2\_1 +  
D2B2A2\_1 +  
D3B2A2\_1 +

B1B2A2\_1 +  
B2B2A2\_1 +  
A1B2D1\_1 +  
A2B2D1\_1 +  
D1B2D1\_1 +  
D2B2D1\_1 +  
D3B2D1\_1 +  
B1B2D1\_1 +  
B2B2D1\_1 +  
A1B2D2\_1 +  
A2B2D2\_1 +  
D1B2D2\_1 +  
D2B2D2\_1 +  
D3B2D2\_1 +  
B1B2D2\_1 +  
B2B2D2\_1 +  
A1B2D3\_1 +  
A2B2D3\_1 +  
D1B2D3\_1 +  
D2B2D3\_1 +  
D3B2D3\_1 +  
B1B2D3\_1 +  
B2B2D3\_1 +  
A1B2B1\_1 +  
A2B2B1\_1 +  
D1B2B1\_1 +  
D2B2B1\_1 +  
D3B2B1\_1 +  
B1B2B1\_1 +  
B2B2B1\_1 +  
A1B2B2\_1 +  
A2B2B2\_1 +  
D1B2B2\_1 +  
D2B2B2\_1 +  
D3B2B2\_1 +  
B1B2B2\_1 +  
B2B2B2\_1;

! all indirect effects B2 group 2

NEW(aiB2\_2);

aiB2\_2 = A1B2A1\_2 +

A2B2A1\_2 +  
D1B2A1\_2 +  
D2B2A1\_2 +  
D3B2A1\_2 +  
B1B2A1\_2 +  
B2B2A1\_2 +  
A1B2A2\_2 +  
A2B2A2\_2 +

D1B2A2\_2 +  
D2B2A2\_2 +  
D3B2A2\_2 +  
B1B2A2\_2 +  
B2B2A2\_2 +  
A1B2D1\_2 +  
A2B2D1\_2 +  
D1B2D1\_2 +  
D2B2D1\_2 +  
D3B2D1\_2 +  
B1B2D1\_2 +  
B2B2D1\_2 +  
A1B2D2\_2 +  
A2B2D2\_2 +  
D1B2D2\_2 +  
D2B2D2\_2 +  
D3B2D2\_2 +  
B1B2D2\_2 +  
B2B2D2\_2 +  
A1B2D3\_2 +  
A2B2D3\_2 +  
D1B2D3\_2 +  
D2B2D3\_2 +  
D3B2D3\_2 +  
B1B2D3\_2 +  
B2B2D3\_2 +  
A1B2B1\_2 +  
A2B2B1\_2 +  
D1B2B1\_2 +  
D2B2B1\_2 +  
D3B2B1\_2 +  
B1B2B1\_2 +  
B2B2B1\_2 +  
A1B2B2\_2 +  
A2B2B2\_2 +  
D1B2B2\_2 +  
D2B2B2\_2 +  
D3B2B2\_2 +  
B1B2B2\_2 +  
B2B2B2\_2;

! Generalized bridge centrality

! r-centrality A1 Group 0

NEW(rcA1\_0 rcA1\_0s);  
rcA1\_0 = D1A1A2\_0 +  
D2A1A2\_0 +

D3A1A2\_0 +  
B1A1A2\_0 +  
B2A1A2\_0 +  
A2A1D1\_0 +  
A2A1D2\_0 +  
A2A1D3\_0 +  
A2A1B1\_0 +  
A2A1B2\_0 +  
D1A1B1\_0 +  
D2A1B1\_0 +  
D3A1B1\_0 +  
D1A1B2\_0 +  
D2A1B2\_0 +  
D3A1B2\_0 +  
B1A1D1\_0 +  
B2A1D1\_0 +  
B1A1D2\_0 +  
B2A1D2\_0 +  
B1A1D3\_0 +  
B2A1D3\_0 +  
B2A1B1\_0 +  
B1A1B2\_0;

! Re-scaled r-centrality  
 $rcA1\_0s = (rcA1\_0)/24;$

! r-centrality A2 Group 0

NEW(rcA2\_0 rcA2\_0s);  
 $rcA2\_0 = D1A2A1\_0 +$   
D2A2A1\_0 +  
D3A2A1\_0 +  
B1A2A1\_0 +  
B2A2A1\_0 +  
A1A2D1\_0 +  
A1A2D2\_0 +  
A1A2D3\_0 +  
A1A2B1\_0 +  
A1A2B2\_0 +  
D1A2B1\_0 +  
D2A2B1\_0 +  
D3A2B1\_0 +  
D1A2B2\_0 +  
D2A2B2\_0 +  
D3A2B2\_0 +  
B1A2D1\_0 +  
B2A2D1\_0 +  
B1A2D2\_0 +

B2A2D2\_0 +  
B1A2D3\_0 +  
B2A2D3\_0 +  
B2A2B1\_0 +  
B1A2B2\_0;

! Re-scaled r-centrality  
 $rcA2\_0s = (rcA2\_0)/24;$

! r-centrality D1 Group 0

NEW(rcD1\_0 rcD1\_0s);  
rcD1\_0 = A1D1D2\_0 +  
A2D1D2\_0 +  
B1D1D2\_0 +  
B2D1D2\_0 +  
A1D1D3\_0 +  
A2D1D3\_0 +  
B1D1D3\_0 +  
B2D1D3\_0 +  
D2D1A1\_0 +  
D3D1A1\_0 +  
D2D1A2\_0 +  
D3D1A2\_0 +  
D2D1B1\_0 +  
D3D1B1\_0 +  
D2D1B2\_0 +  
D3D1B2\_0 +  
A1D1B1\_0 +  
A2D1B1\_0 +  
A1D1B2\_0 +  
A2D1B2\_0 +  
B1D1A1\_0 +  
B2D1A1\_0 +  
B1D1A2\_0 +  
B2D1A2\_0 +  
B2D1B1\_0 +  
B1D1B2\_0;

! Re-scaled r-centrality  
 $rcD1\_0s = (rcD1\_0)/26;$

! r-centrality D2 Group 0

NEW(rcD2\_0 rcD2\_0s);  
rcD2\_0 = A1D2D1\_0 +  
A2D2D1\_0 +

B1D2D1\_0 +  
B2D2D1\_0 +  
A1D2D3\_0 +  
A2D2D3\_0 +  
B1D2D3\_0 +  
B2D2D3\_0 +  
D1D2A1\_0 +  
D3D2A1\_0 +  
D1D2A2\_0 +  
D3D2A2\_0 +  
D1D2B1\_0 +  
D3D2B1\_0 +  
D1D2B2\_0 +  
D3D2B2\_0 +  
A1D2B1\_0 +  
A2D2B1\_0 +  
A1D2B2\_0 +  
A2D2B2\_0 +  
B1D2A1\_0 +  
B2D2A1\_0 +  
B1D2A2\_0 +  
B2D2A2\_0 +  
B2D2B1\_0 +  
B1D2B2\_0;

! Re-scaled r-centrality  
 $rcD2\_0s = (rcD2\_0)/26;$

! r-centrality D3 Group 0

NEW(rcD3\_0 rcD3\_0s);  
 $rcD3\_0 = A1D3D1\_0 +$   
A2D3D1\_0 +  
B1D3D1\_0 +  
B2D3D1\_0 +  
A1D3D2\_0 +  
A2D3D2\_0 +  
B1D3D2\_0 +  
B2D3D2\_0 +  
D1D3A1\_0 +  
D2D3A1\_0 +  
D1D3A2\_0 +  
D2D3A2\_0 +  
D1D3B1\_0 +  
D2D3B1\_0 +  
D1D3B2\_0 +  
D2D3B2\_0 +  
A1D3B1\_0 +



A2D3B1\_0 +  
A1D3B2\_0 +  
A2D3B2\_0 +  
B1D3A1\_0 +  
B2D3A1\_0 +  
B1D3A2\_0 +  
B2D3A2\_0 +  
B2D3B1\_0 +  
B1D3B2\_0;

! Re-scaled r-centrality  
 $rcD3\_0s = (rcD3\_0)/26;$

! r-centrality B1 Group 0

NEW(rcB1\_0 rcB1\_0s);  
rcB1\_0 = D1B1A1\_0 +  
D2B1A1\_0 +  
D3B1A1\_0 +  
B2B1A1\_0 +  
D1B1A2\_0 +  
D2B1A2\_0 +  
D3B1A2\_0 +  
B2B1A2\_0 +  
A1B1D1\_0 +  
A2B1D1\_0 +  
B2B1D1\_0 +  
A1B1D2\_0 +  
A2B1D2\_0 +  
B2B1D2\_0 +  
A1B1D3\_0 +  
A2B1D3\_0 +  
B2B1D3\_0 +  
A1B1B2\_0 +  
A2B1B2\_0 +  
D1B1B2\_0 +  
D2B1B2\_0 +  
D3B1B2\_0;

! Re-scaled r-centrality  
 $rcB1\_0s = (rcB1\_0)/22;$

! r-centrality B2 Group 0

NEW(rcB2\_0 rcB2\_0s);  
rcB2\_0 = D1B2A1\_0 +  
D2B2A1\_0 +

D3B2A1\_0 +  
B1B2A1\_0 +  
D1B2A2\_0 +  
D2B2A2\_0 +  
D3B2A2\_0 +  
B1B2A2\_0 +  
A1B2D1\_0 +  
A2B2D1\_0 +  
B1B2D1\_0 +  
A1B2D2\_0 +  
A2B2D2\_0 +  
B1B2D2\_0 +  
A1B2D3\_0 +  
A2B2D3\_0 +  
B1B2D3\_0 +  
A1B2B1\_0 +  
A2B2B1\_0 +  
D1B2B1\_0 +  
D2B2B1\_0 +  
D3B2B1\_0;

! Re-scaled r-centrality  
 $rcB2\_0s = (rcB2\_0)/22;$

! r-centrality A1 Group 1

NEW(rcA1\_1 rcA1\_1s);  
 $rcA1\_1 = D1A1A2\_1 +$   
D2A1A2\_1 +  
D3A1A2\_1 +  
B1A1A2\_1 +  
B2A1A2\_1 +  
A2A1D1\_1 +  
A2A1D2\_1 +  
A2A1D3\_1 +  
A2A1B1\_1 +  
A2A1B2\_1 +  
D1A1B1\_1 +  
D2A1B1\_1 +  
D3A1B1\_1 +  
D1A1B2\_1 +  
D2A1B2\_1 +  
D3A1B2\_1 +  
B1A1D1\_1 +  
B2A1D1\_1 +  
B1A1D2\_1 +  
B2A1D2\_1 +  
B1A1D3\_1 +

B2A1D3\_1 +  
B2A1B1\_1 +  
B1A1B2\_1;

! Re-scaled r-centrality  
 $rcA1\_1s = (rcA1\_1)/24;$

! r-centrality A2 Group 1

NEW(rcA2\_1 rcA2\_1s);  
rcA2\_1 = D1A2A1\_1 +  
D2A2A1\_1 +  
D3A2A1\_1 +  
B1A2A1\_1 +  
B2A2A1\_1 +  
A1A2D1\_1 +  
A1A2D2\_1 +  
A1A2D3\_1 +  
A1A2B1\_1 +  
A1A2B2\_1 +  
D1A2B1\_1 +  
D2A2B1\_1 +  
D3A2B1\_1 +  
D1A2B2\_1 +  
D2A2B2\_1 +  
D3A2B2\_1 +  
B1A2D1\_1 +  
B2A2D1\_1 +  
B1A2D2\_1 +  
B2A2D2\_1 +  
B1A2D3\_1 +  
B2A2D3\_1 +  
B2A2B1\_1 +  
B1A2B2\_1;

! Re-scaled r-centrality  
 $rcA2\_1s = (rcA2\_1)/24;$

! r-centrality D1 Group 1

NEW(rcD1\_1 rcD1\_1s);  
rcD1\_1 = A1D1D2\_1 +  
A2D1D2\_1 +  
B1D1D2\_1 +  
B2D1D2\_1 +  
A1D1D3\_1 +  
A2D1D3\_1 +

B1D1D3\_1 +  
B2D1D3\_1 +  
D2D1A1\_1 +  
D3D1A1\_1 +  
D2D1A2\_1 +  
D3D1A2\_1 +  
D2D1B1\_1 +  
D3D1B1\_1 +  
D2D1B2\_1 +  
D3D1B2\_1 +  
A1D1B1\_1 +  
A2D1B1\_1 +  
A1D1B2\_1 +  
A2D1B2\_1 +  
B1D1A1\_1 +  
B2D1A1\_1 +  
B1D1A2\_1 +  
B2D1A2\_1 +  
B2D1B1\_1 +  
B1D1B2\_1;

! Re-scaled r-centrality  
 $rcD1\_1s = (rcD1\_1)/26;$

! r-centrality D2 Group 1

NEW(rcD2\_1 rcD2\_1s);  
 $rcD2\_1 = A1D2D1\_1 +$   
A2D2D1\_1 +  
B1D2D1\_1 +  
B2D2D1\_1 +  
A1D2D3\_1 +  
A2D2D3\_1 +  
B1D2D3\_1 +  
B2D2D3\_1 +  
D1D2A1\_1 +  
D3D2A1\_1 +  
D1D2A2\_1 +  
D3D2A2\_1 +  
D1D2B1\_1 +  
D3D2B1\_1 +  
D1D2B2\_1 +  
D3D2B2\_1 +  
A1D2B1\_1 +  
A2D2B1\_1 +  
A1D2B2\_1 +  
A2D2B2\_1 +  
B1D2A1\_1 +

B2D2A1\_1 +  
B1D2A2\_1 +  
B2D2A2\_1 +  
B2D2B1\_1 +  
B1D2B2\_1;

! Re-scaled r-centrality  
 $rcD2\_1s = (rcD2\_1)/26;$

! r-centrality D3 Group 1

NEW(rcD3\_1 rcD3\_1s);  
 $rcD3\_1 = A1D3D1\_1 +$   
A2D3D1\_1 +  
B1D3D1\_1 +  
B2D3D1\_1 +  
A1D3D2\_1 +  
A2D3D2\_1 +  
B1D3D2\_1 +  
B2D3D2\_1 +  
D1D3A1\_1 +  
D2D3A1\_1 +  
D1D3A2\_1 +  
D2D3A2\_1 +  
D1D3B1\_1 +  
D2D3B1\_1 +  
D1D3B2\_1 +  
D2D3B2\_1 +  
A1D3B1\_1 +  
A2D3B1\_1 +  
A1D3B2\_1 +  
A2D3B2\_1 +  
B1D3A1\_1 +  
B2D3A1\_1 +  
B1D3A2\_1 +  
B2D3A2\_1 +  
B2D3B1\_1 +  
B1D3B2\_1;

! Re-scaled r-centrality  
 $rcD3\_1s = (rcD3\_1)/26;$

! r-centrality B1 Group 1

NEW(rcB1\_1 rcB1\_1s);  
 $rcB1\_1 = D1B1A1\_1 +$   
D2B1A1\_1 +

D3B1A1\_1 +  
B2B1A1\_1 +  
D1B1A2\_1 +  
D2B1A2\_1 +  
D3B1A2\_1 +  
B2B1A2\_1 +  
A1B1D1\_1 +  
A2B1D1\_1 +  
B2B1D1\_1 +  
A1B1D2\_1 +  
A2B1D2\_1 +  
B2B1D2\_1 +  
A1B1D3\_1 +  
A2B1D3\_1 +  
B2B1D3\_1 +  
A1B1B2\_1 +  
A2B1B2\_1 +  
D1B1B2\_1 +  
D2B1B2\_1 +  
D3B1B2\_1;

! Re-scaled r-centrality  
 $rcB1\_1s = (rcB1\_1)/22;$

! r-centrality B2 Group 1

NEW( $rcB2\_1$   $rcB2\_1s$ );  
 $rcB2\_1 = D1B2A1\_1 +$   
D2B2A1\_1 +  
D3B2A1\_1 +  
B1B2A1\_1 +  
D1B2A2\_1 +  
D2B2A2\_1 +  
D3B2A2\_1 +  
B1B2A2\_1 +  
A1B2D1\_1 +  
A2B2D1\_1 +  
B1B2D1\_1 +  
A1B2D2\_1 +  
A2B2D2\_1 +  
B1B2D2\_1 +  
A1B2D3\_1 +  
A2B2D3\_1 +  
B1B2D3\_1 +  
A1B2B1\_1 +  
A2B2B1\_1 +  
D1B2B1\_1 +  
D2B2B1\_1 +

D3B2B1\_1;

! Re-scaled r-centrality

$rcB2\_1s = (rcB2\_1)/22;$

! r-centrality A1 Group 2

NEW(rcA1\_2 rcA1\_2s);

$rcA1\_2 = D1A1A2\_2 +$

$D2A1A2\_2 +$

$D3A1A2\_2 +$

$B1A1A2\_2 +$

$B2A1A2\_2 +$

$A2A1D1\_2 +$

$A2A1D2\_2 +$

$A2A1D3\_2 +$

$A2A1B1\_2 +$

$A2A1B2\_2 +$

$D1A1B1\_2 +$

$D2A1B1\_2 +$

$D3A1B1\_2 +$

$D1A1B2\_2 +$

$D2A1B2\_2 +$

$D3A1B2\_2 +$

$B1A1D1\_2 +$

$B2A1D1\_2 +$

$B1A1D2\_2 +$

$B2A1D2\_2 +$

$B1A1D3\_2 +$

$B2A1D3\_2 +$

$B2A1B1\_2 +$

$B1A1B2\_2;$

! Re-scaled r-centrality

$rcA1\_2s = (rcA1\_2)/24;$

! r-centrality A2 Group 2

NEW(rcA2\_2 rcA2\_2s);

$rcA2\_2 = D1A2A1\_2 +$

$D2A2A1\_2 +$

$D3A2A1\_2 +$

$B1A2A1\_2 +$

$B2A2A1\_2 +$

$A1A2D1\_2 +$

$A1A2D2\_2 +$

$A1A2D3\_2 +$

A1A2B1\_2 +  
A1A2B2\_2 +  
D1A2B1\_2 +  
D2A2B1\_2 +  
D3A2B1\_2 +  
D1A2B2\_2 +  
D2A2B2\_2 +  
D3A2B2\_2 +  
B1A2D1\_2 +  
B2A2D1\_2 +  
B1A2D2\_2 +  
B2A2D2\_2 +  
B1A2D3\_2 +  
B2A2D3\_2 +  
B2A2B1\_2 +  
B1A2B2\_2;

! Re-scaled r-centrality  
 $rcA2\_2s = (rcA2\_2)/24;$

! r-centrality D1 Group 2

NEW(rcD1\_2 rcD1\_2s);  
 $rcD1\_2 = A1D1D2\_2 +$   
A2D1D2\_2 +  
B1D1D2\_2 +  
B2D1D2\_2 +  
A1D1D3\_2 +  
A2D1D3\_2 +  
B1D1D3\_2 +  
B2D1D3\_2 +  
D2D1A1\_2 +  
D3D1A1\_2 +  
D2D1A2\_2 +  
D3D1A2\_2 +  
D2D1B1\_2 +  
D3D1B1\_2 +  
D2D1B2\_2 +  
D3D1B2\_2 +  
A1D1B1\_2 +  
A2D1B1\_2 +  
A1D1B2\_2 +  
A2D1B2\_2 +  
B1D1A1\_2 +  
B2D1A1\_2 +  
B1D1A2\_2 +  
B2D1A2\_2 +  
B2D1B1\_2 +



B1D1B2\_2;

! Re-scaled r-centrality

$rcD1\_2s = (rcD1\_2)/26;$

! r-centrality D2 Group 2

NEW(rcD2\_2 rcD2\_2s);

$rcD2\_2 = A1D2D1\_2 +$

$A2D2D1\_2 +$

$B1D2D1\_2 +$

$B2D2D1\_2 +$

$A1D2D3\_2 +$

$A2D2D3\_2 +$

$B1D2D3\_2 +$

$B2D2D3\_2 +$

$D1D2A1\_2 +$

$D3D2A1\_2 +$

$D1D2A2\_2 +$

$D3D2A2\_2 +$

$D1D2B1\_2 +$

$D3D2B1\_2 +$

$D1D2B2\_2 +$

$D3D2B2\_2 +$

$A1D2B1\_2 +$

$A2D2B1\_2 +$

$A1D2B2\_2 +$

$A2D2B2\_2 +$

$B1D2A1\_2 +$

$B2D2A1\_2 +$

$B1D2A2\_2 +$

$B2D2A2\_2 +$

$B2D2B1\_2 +$

$B1D2B2\_2;$

! Re-scaled r-centrality

$rcD2\_2s = (rcD2\_2)/26;$

! r-centrality D3 Group 2

NEW(rcD3\_2 rcD3\_2s);

$rcD3\_2 = A1D3D1\_2 +$

$A2D3D1\_2 +$

$B1D3D1\_2 +$

$B2D3D1\_2 +$

$A1D3D2\_2 +$

$A2D3D2\_2 +$

B1D3D2\_2 +  
B2D3D2\_2 +  
D1D3A1\_2 +  
D2D3A1\_2 +  
D1D3A2\_2 +  
D2D3A2\_2 +  
D1D3B1\_2 +  
D2D3B1\_2 +  
D1D3B2\_2 +  
D2D3B2\_2 +  
A1D3B1\_2 +  
A2D3B1\_2 +  
A1D3B2\_2 +  
A2D3B2\_2 +  
B1D3A1\_2 +  
B2D3A1\_2 +  
B1D3A2\_2 +  
B2D3A2\_2 +  
B2D3B1\_2 +  
B1D3B2\_2;

! Re-scaled r-centrality  
 $rcD3\_2s = (rcD3\_2)/26;$

! r-centrality B1 Group 2

NEW(rcB1\_2 rcB1\_2s);  
 $rcB1\_2 = D1B1A1\_2 +$   
D2B1A1\_2 +  
D3B1A1\_2 +  
B2B1A1\_2 +  
D1B1A2\_2 +  
D2B1A2\_2 +  
D3B1A2\_2 +  
B2B1A2\_2 +  
A1B1D1\_2 +  
A2B1D1\_2 +  
B2B1D1\_2 +  
A1B1D2\_2 +  
A2B1D2\_2 +  
B2B1D2\_2 +  
A1B1D3\_2 +  
A2B1D3\_2 +  
B2B1D3\_2 +  
A1B1B2\_2 +  
A2B1B2\_2 +  
D1B1B2\_2 +  
D2B1B2\_2 +

D3B1B2\_2;

! Re-scaled r-centrality

$rcB1\_2s = (rcB1\_2)/22;$

! r-centrality B2 Group 2

NEW(rcB2\_2 rcB2\_2s);

$rcB2\_2 = D1B2A1\_2 +$

$D2B2A1\_2 +$

$D3B2A1\_2 +$

$B1B2A1\_2 +$

$D1B2A2\_2 +$

$D2B2A2\_2 +$

$D3B2A2\_2 +$

$B1B2A2\_2 +$

$A1B2D1\_2 +$

$A2B2D1\_2 +$

$B1B2D1\_2 +$

$A1B2D2\_2 +$

$A2B2D2\_2 +$

$B1B2D2\_2 +$

$A1B2D3\_2 +$

$A2B2D3\_2 +$

$B1B2D3\_2 +$

$A1B2B1\_2 +$

$A2B2B1\_2 +$

$D1B2B1\_2 +$

$D2B2B1\_2 +$

$D3B2B1\_2;$

! Re-scaled r-centrality

$rcB2\_2s = (rcB2\_2)/22;$

! New measures 12 June - Test diff r centrality

! Test for group 0 (comorbid)

! D3 (Down - all other bridge effects)

NEW(dfDA1\_0);

$dfDA1\_0 = rcD3\_0s - rcA1\_0s;$

NEW(dfDA2\_0);

$dfDA2\_0 = rcD3\_0s - rcA2\_0s;$

NEW(dfDB1\_0);

$dfDB1\_0 = rcD3\_0s - rcB1\_0s;$

NEW(dfDB2\_0);

$dfDB2\_0 = rcD3\_0s - rcB2\_0s;$

NEW(dfDD1\_0);

$dfDD1\_0 = rcD3\_0s - rcD1\_0s;$

NEW(dfDD2\_0);

dfDD2\_0 = rcD3\_0s - rcD2\_0s;

! Test for group 1 (depression) not cheerful(d1) - all other effects;

NEW(dfDA1\_1);

dfDA1\_1 = rcD1\_1s - rcA1\_1s;

NEW(dfDA2\_1);

dfDA2\_1 = rcD1\_1s - rcA2\_1s;

NEW(dfDB1\_1);

dfDB1\_1 = rcD1\_1s - rcB1\_1s;

NEW(dfDB2\_1);

dfDB2\_1 = rcD1\_1s - rcB2\_1s;

NEW(dfDD2\_1);

dfDD2\_1 = rcD1\_1s - rcD2\_1s;

NEW(dfDD3\_1);

dfDD3\_1 = rcD1\_1s - rcD3\_1s;

! Test for group 2 (anxiety) Down (d3) - all other effects;

NEW(dfDA1\_2);

dfDA1\_2 = rcD3\_2s - rcA1\_2s;

NEW(dfDA2\_2);

dfDA2\_2 = rcD3\_2s - rcA2\_2s;

NEW(dfDB1\_2);

dfDB1\_2 = rcD3\_2s - rcB1\_2s;

NEW(dfDB2\_2);

dfDB2\_2 = rcD3\_2s - rcB2\_2s;

NEW(dfDD1\_2);

dfDD1\_2 = rcD3\_2s - rcD1\_2s;

NEW(dfDD2\_2);

dfDD2\_2 = rcD3\_2s - rcD2\_2s;

OUTPUT: TECH1 TECH8 STDYX cinterval patterns;

!SAVEDATA:

!PARAMETERS = bpars\_saved.dat;

!FILE IS fscores\_saved.dat;

!AVE IS FSCORES(30,10);
